# Supplementary material for: Organocatalytic enantioselective conjugate addition of pyrazolin-5-ones to arylomethylidene malonates
Source: Royal Society of Chemistry journal article supplement (doi:10.1039/c9ob01700c), 2019-01-01
Supplement: c9ob01700c1.pdf [file c9ob01700c1.pdf]

# Organocatalytic Enantioselective Conjugate Addition of Pyrazolin-5-ones to Arylomethylidene Malonates

Arun Sharma, Vivek Sharma, Swapandeep Singh Chimni\*

Department of Chemistry Guru Nanak Dev University Amritsar-143005, Punjab, India

| S.No. |                                                                     | Page no. |
|-------|---------------------------------------------------------------------|----------|
| 1.    | <sup>1</sup> H and <sup>13</sup> C spectra of compound <b>1a–5a</b> | S2–S44   |
| 2.    | HPLC chromatograms of compound <b>3a–5a</b>                         | S45–S72  |

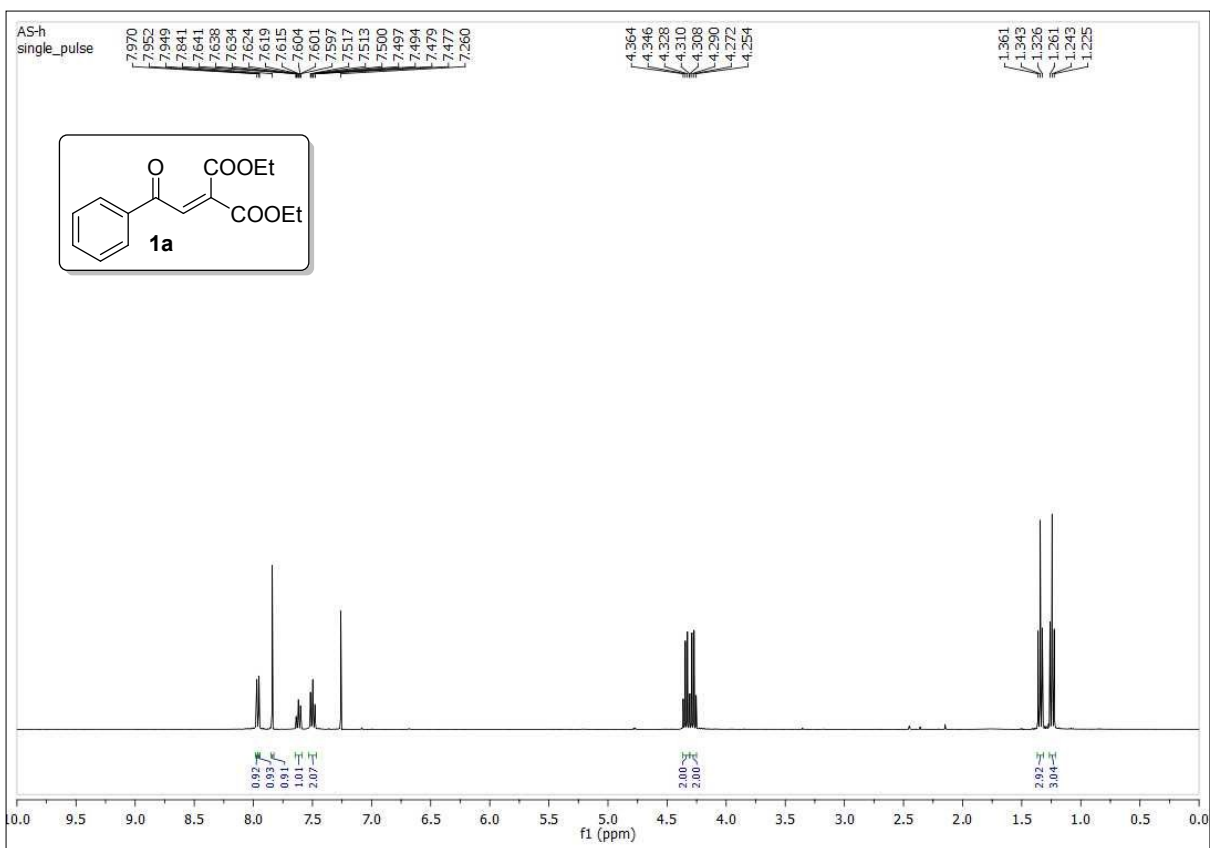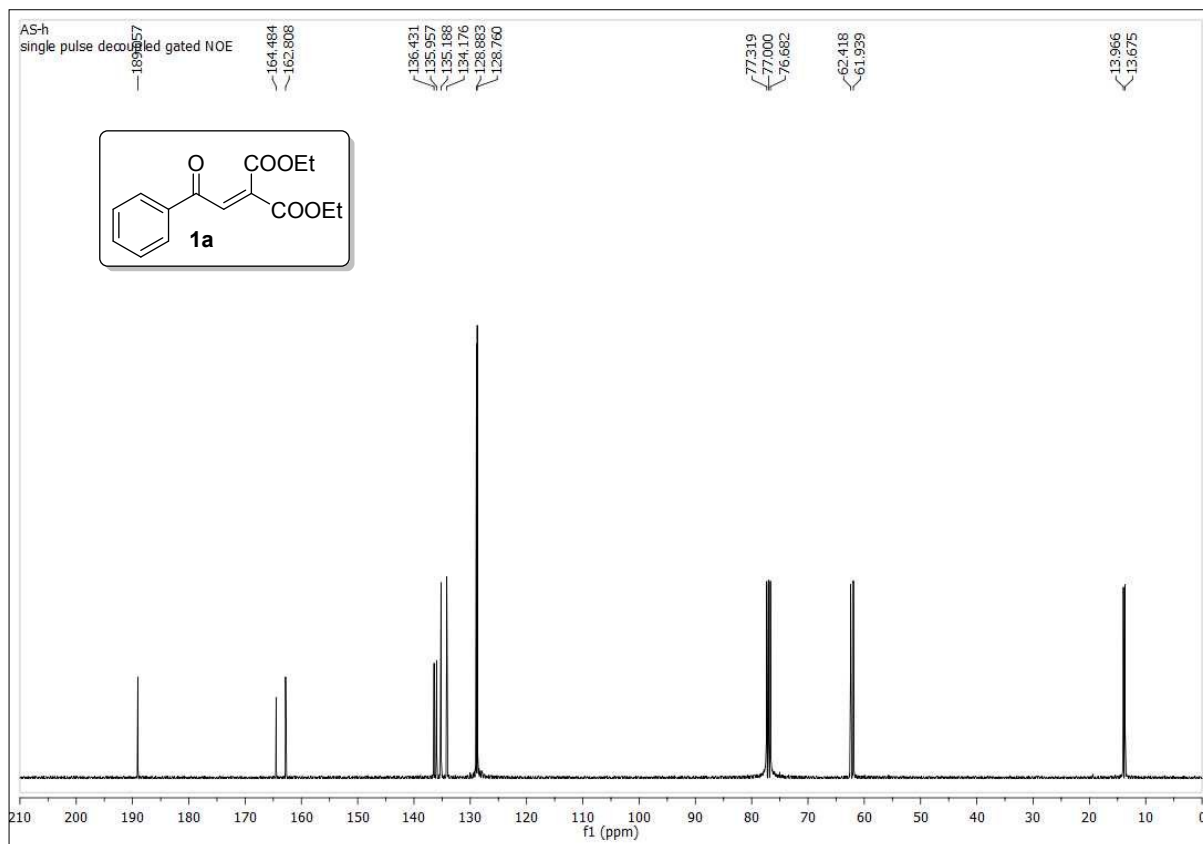

Jan28-2019  
2-Cl

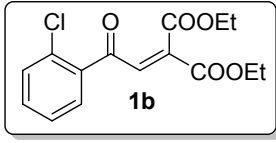

7.649  
7.628  
7.611  
7.481  
7.478  
7.381  
7.378  
7.364  
7.361

4.355  
4.340  
4.326  
4.322  
4.307  
4.293

1.357  
1.342  
1.328  
1.314  
1.300

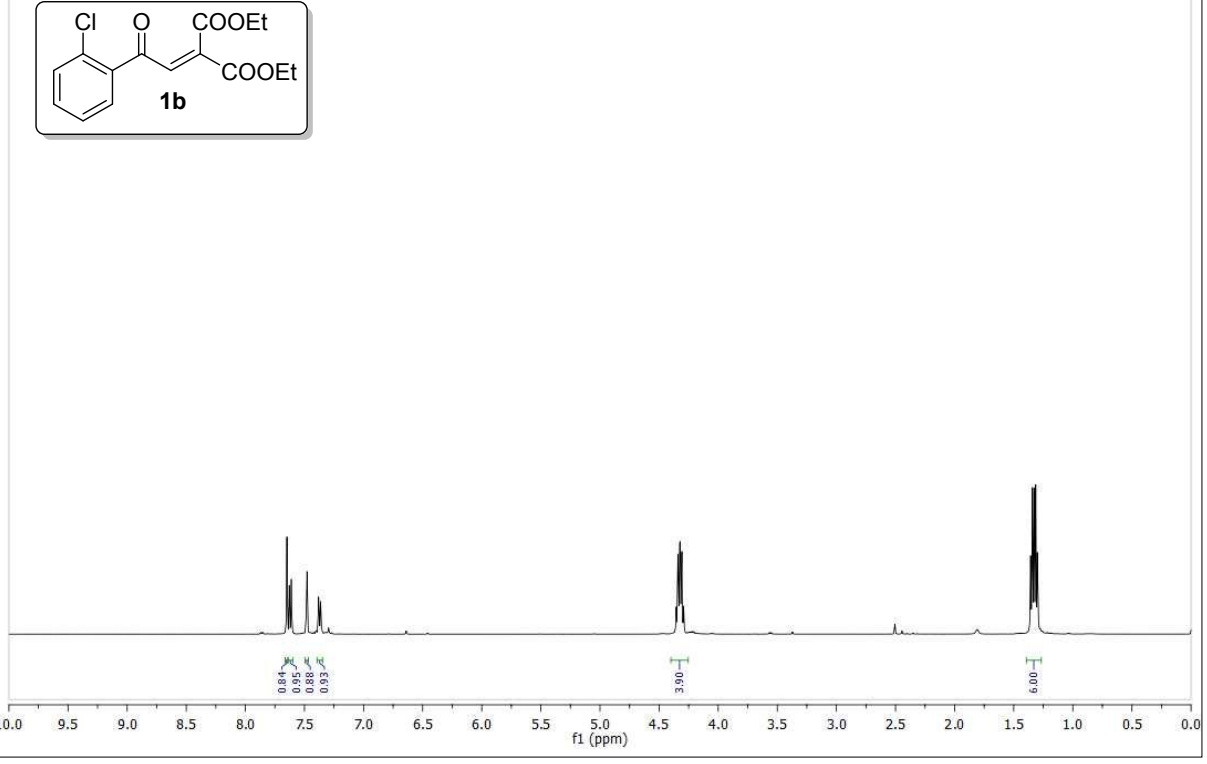

Jan28-2019  
2-Cl

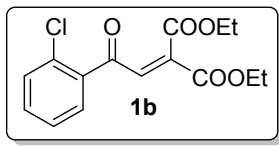

188.962

164.193  
162.559

139.182  
136.138  
135.737  
134.884  
133.527  
131.798  
130.506  
127.563

77.254  
77.000  
76.745

62.435  
62.004

13.877  
13.696

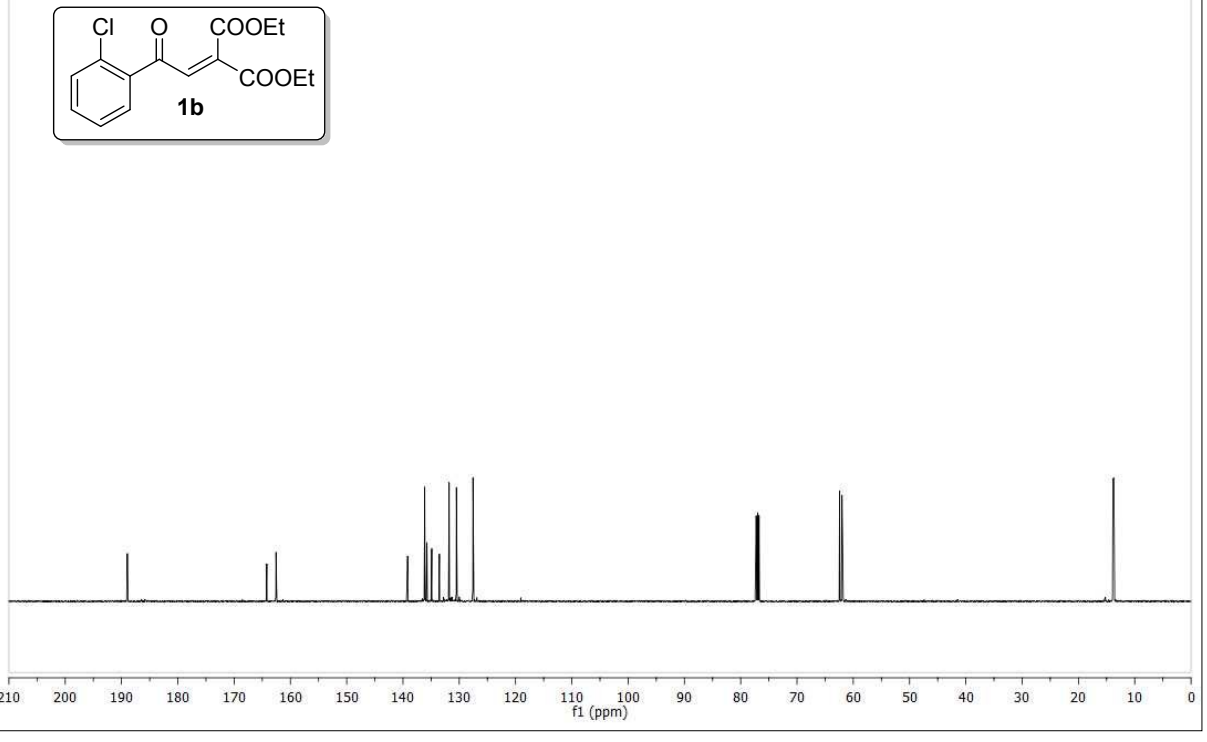





AS-4-F  
single\_pulse

8.035  
8.022  
8.013  
7.999

7.212  
7.190  
7.169

4.380  
4.363  
4.345  
4.334  
4.327  
4.316  
4.298  
4.280

1.378  
1.360  
1.342  
1.287  
1.269  
1.251

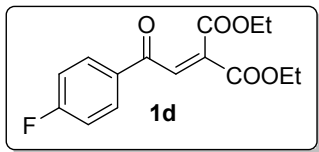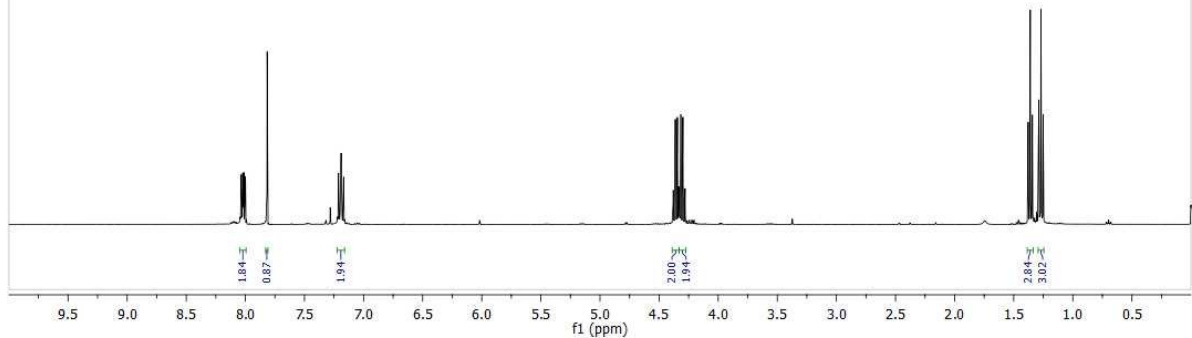

AS-4-F  
single\_pulse decoupled gated

187.497  
167.779  
165.821  
164.863  
162.712

136.626  
134.834  
132.458  
132.428  
131.594  
131.497

116.275  
116.054

77.318  
77.000  
76.681

62.474  
61.981

13.950  
13.687

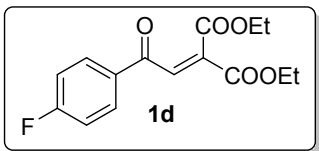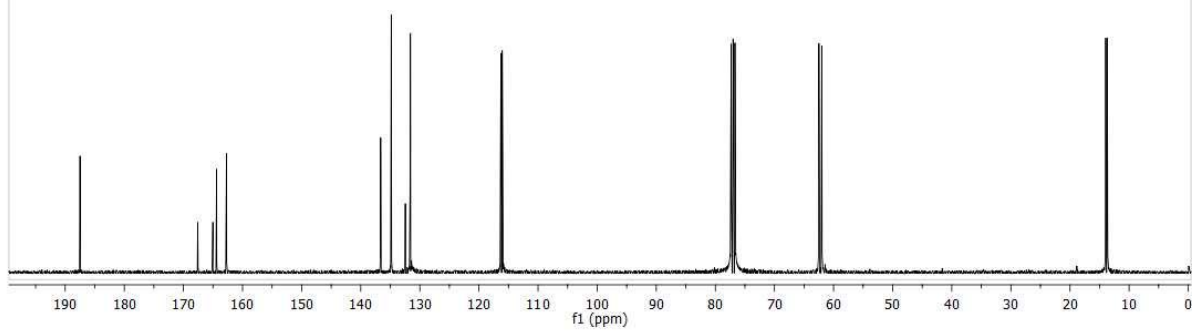

AS-S-1  
single\_pulse

7.821  
7.800  
7.765  
7.638  
7.616  
7.260  
7.258

4.349  
4.331  
4.314  
4.305  
4.285  
4.287  
4.269  
4.251

1.346  
1.329  
1.311  
1.261  
1.243  
1.225

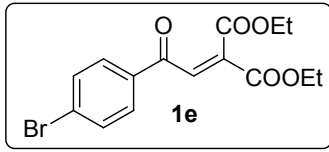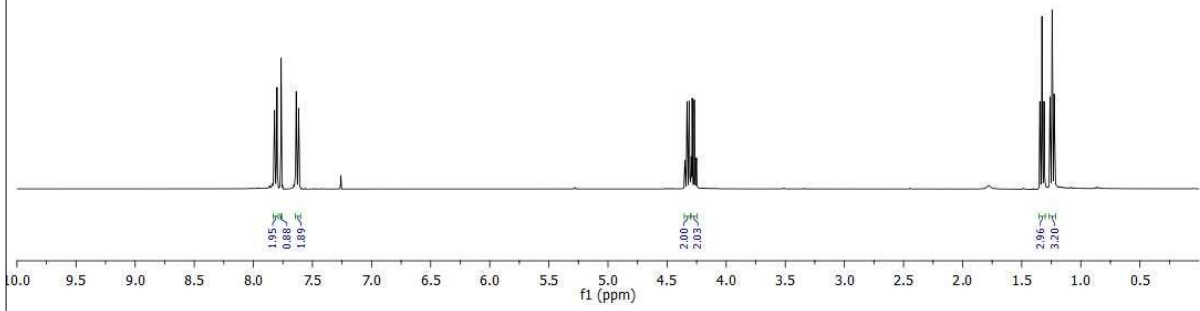

AS-S-1  
single pulse decoupled gated NOE

188.840

164.285  
162.621

136.824  
134.655  
134.499  
132.213  
130.134  
129.583

77.319  
77.000  
76.681

62.477  
61.983

13.926  
13.673

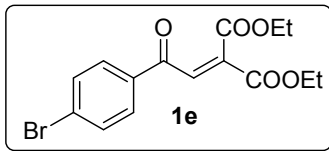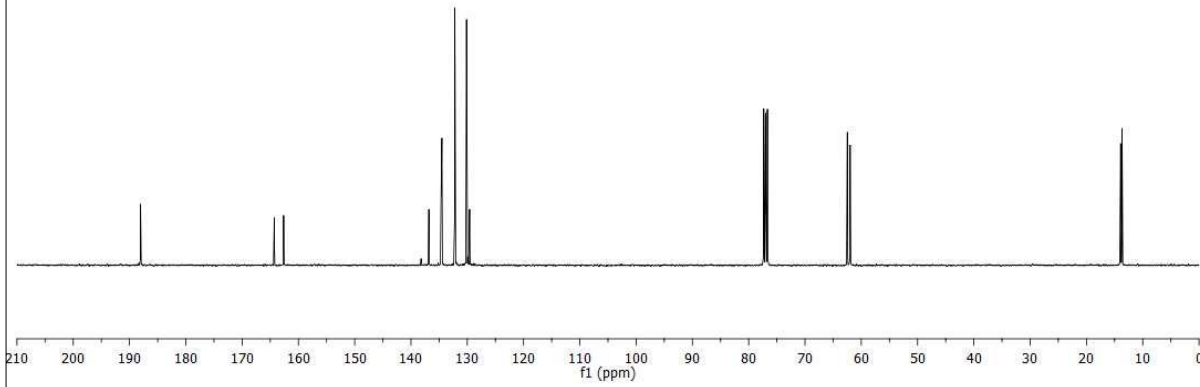

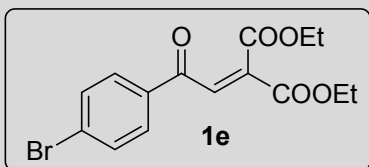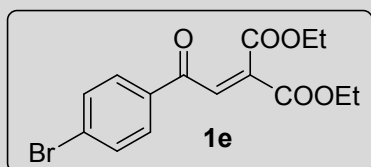

AS-S-3  
single\_pulse

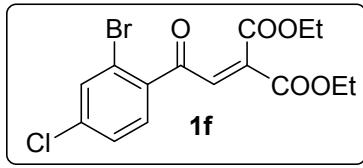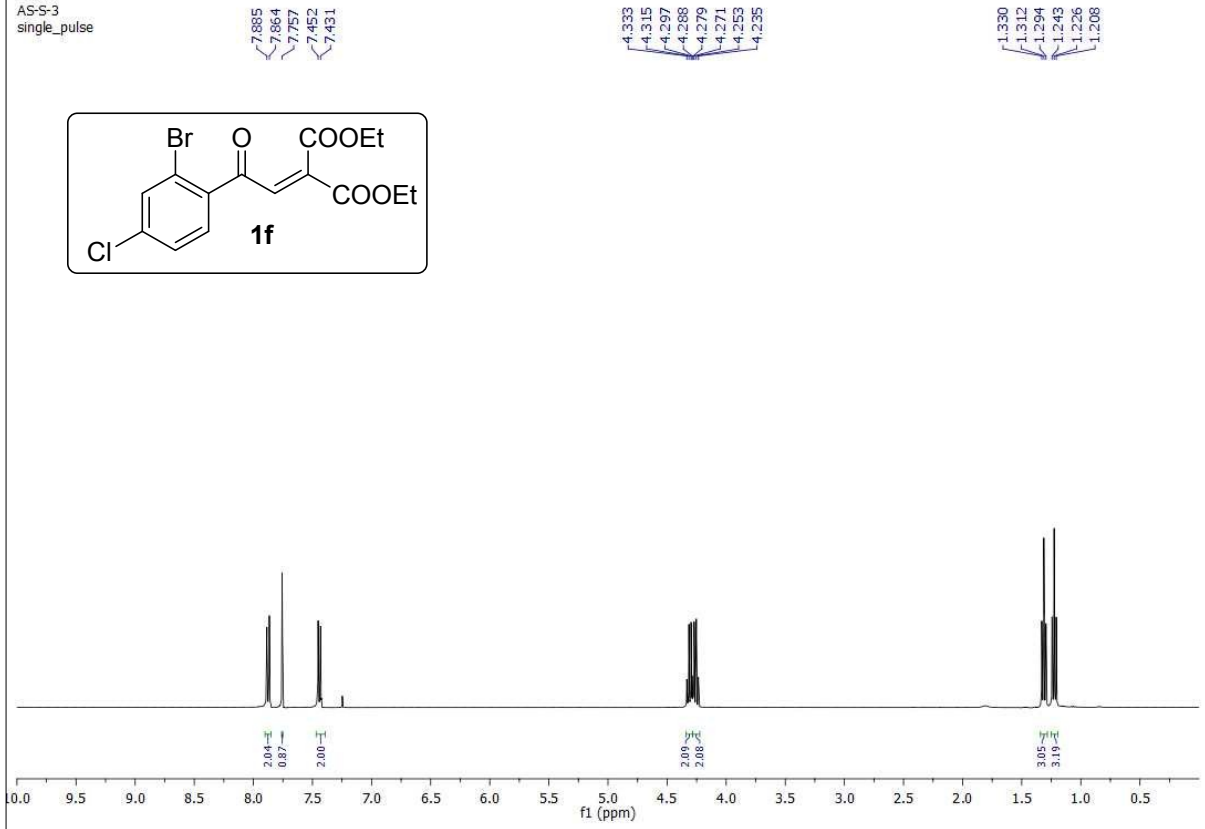

Anun  
3-Br-racemic

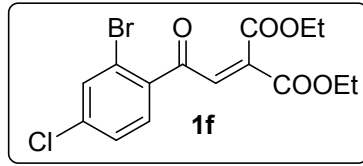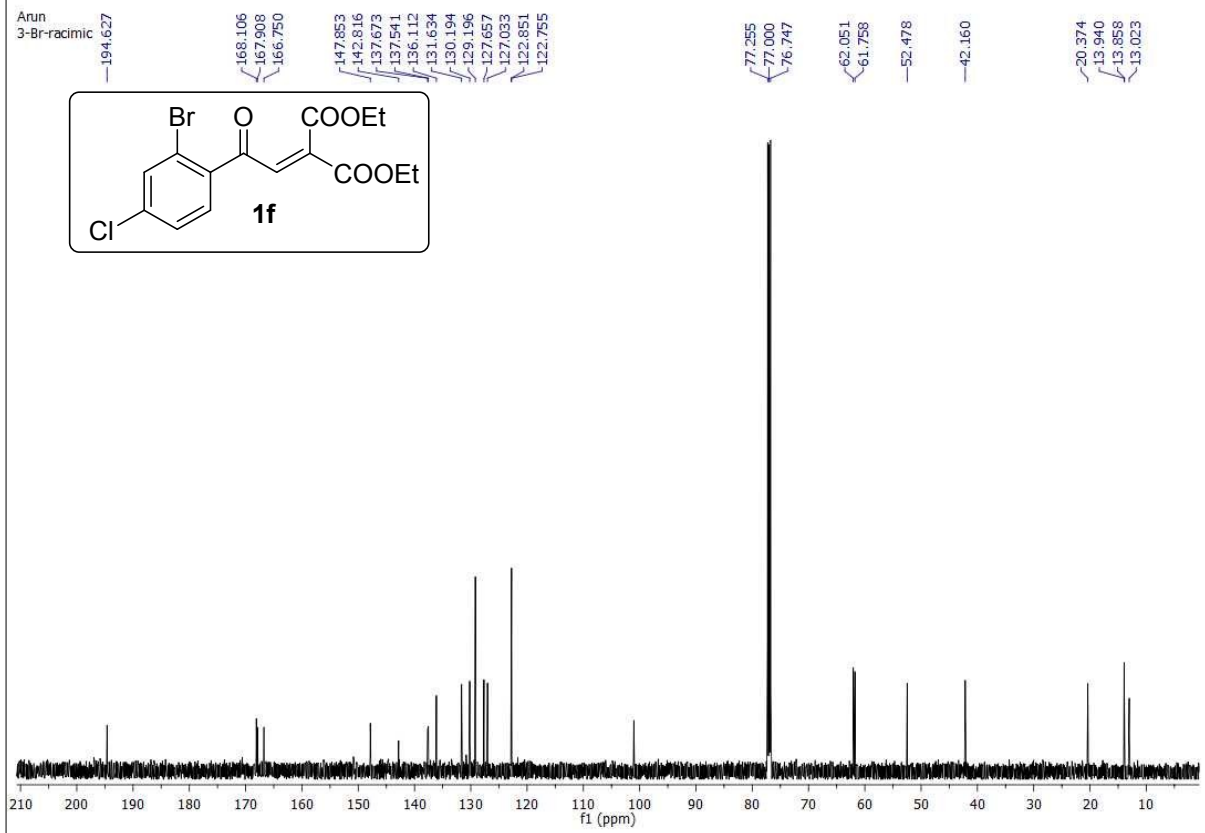

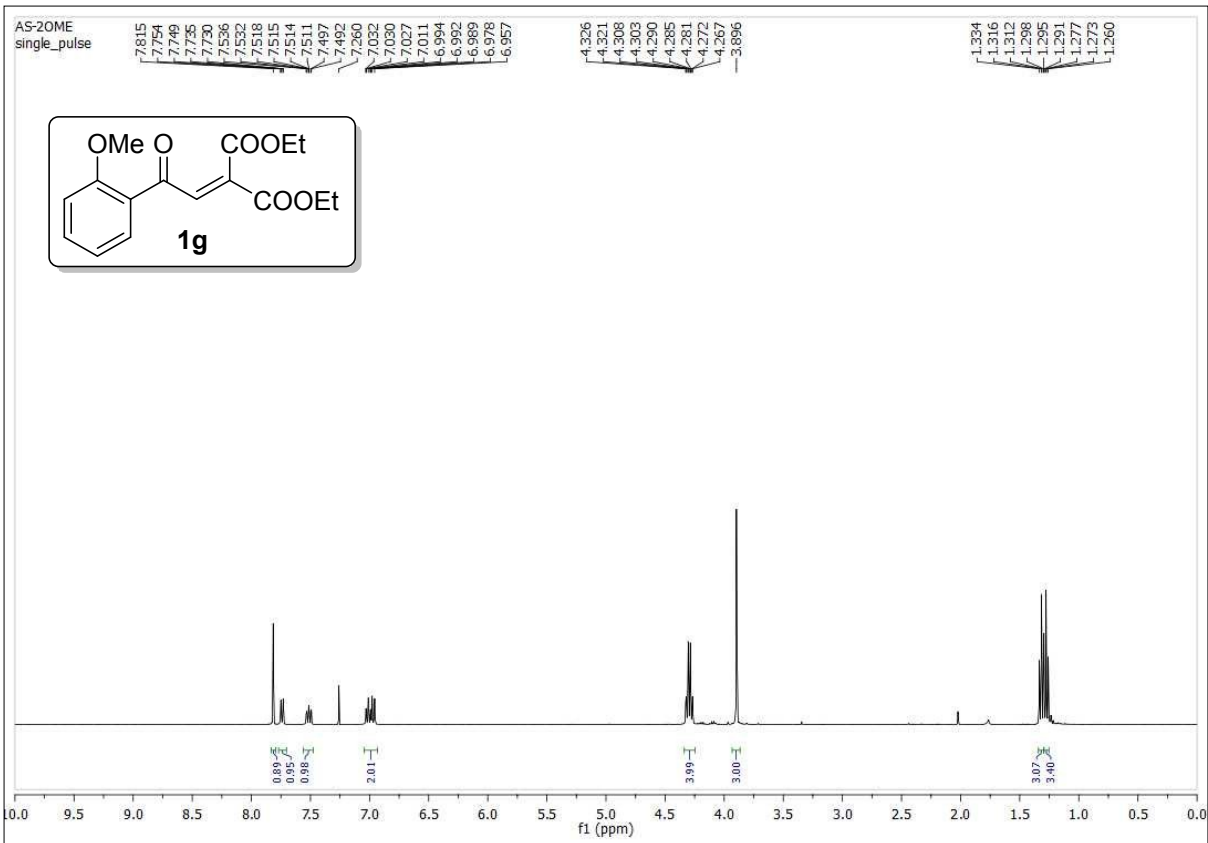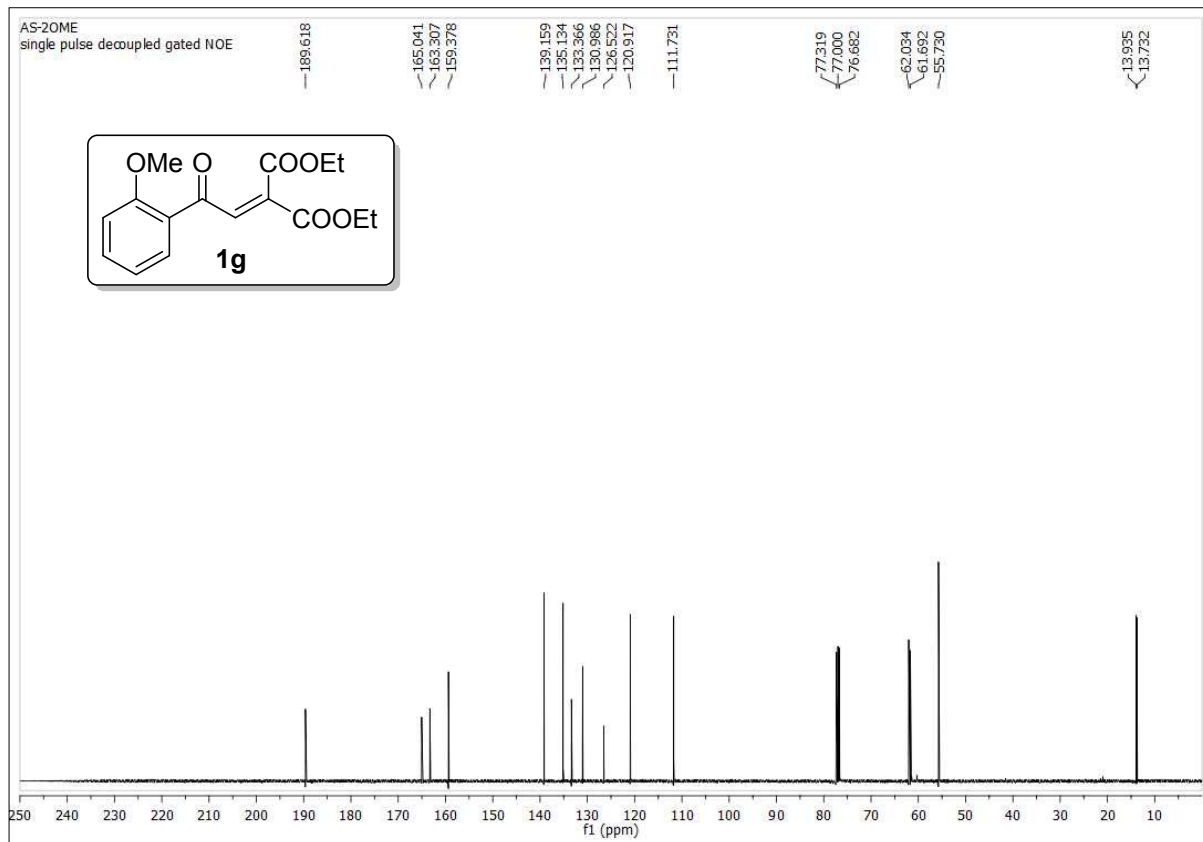

Jan28-2019  
3-ome

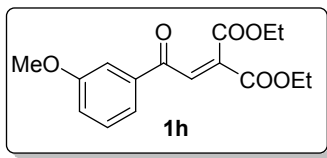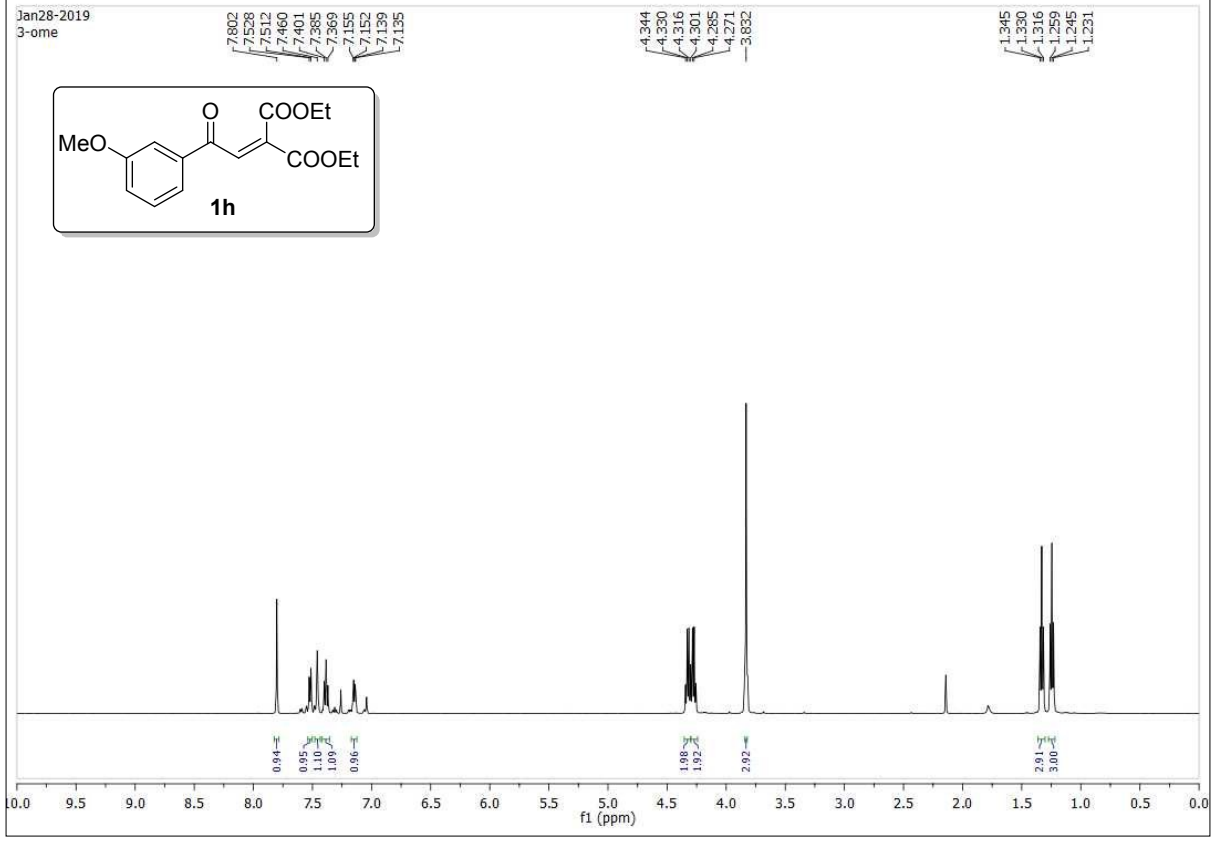

AS-3-OME  
single pulse decoupled gated NOE

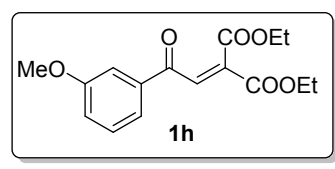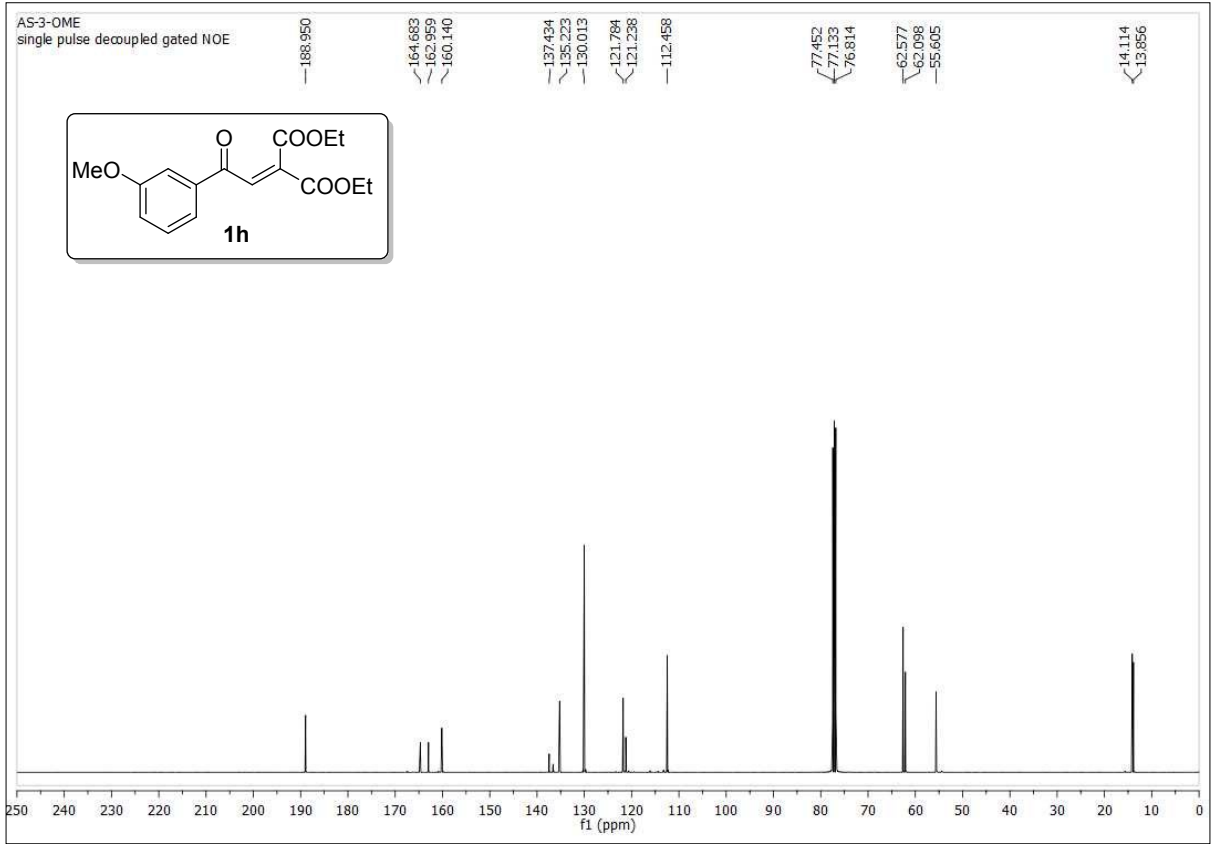

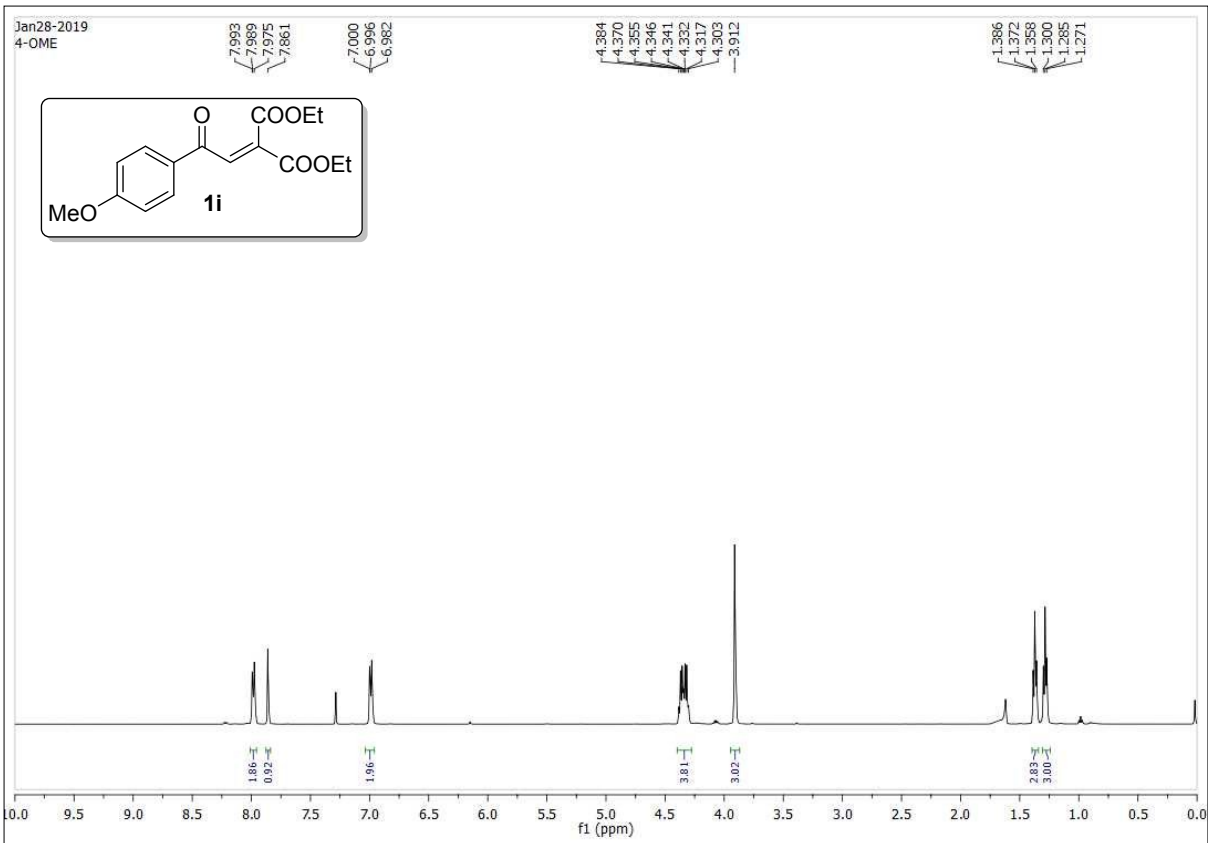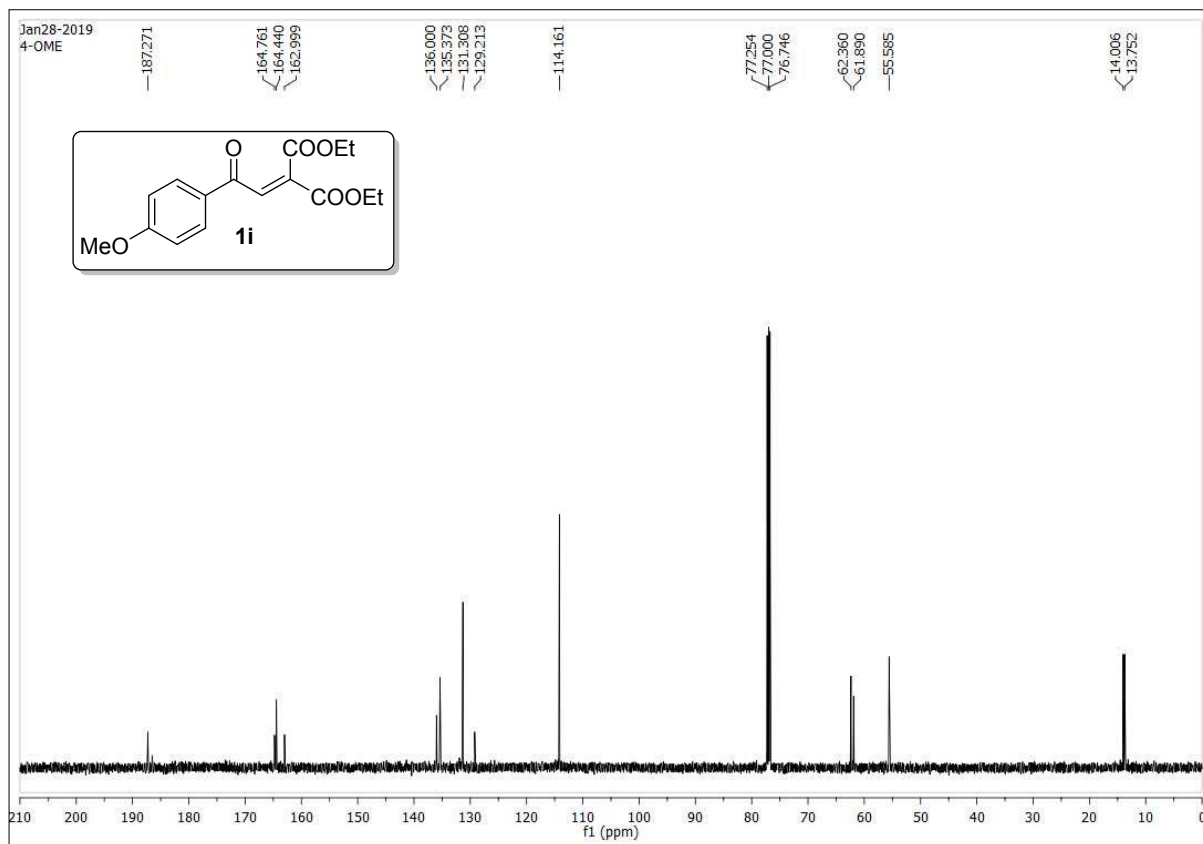

Jan28-2019  
4-ME

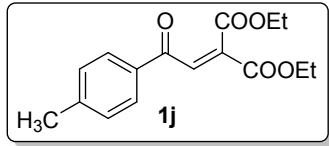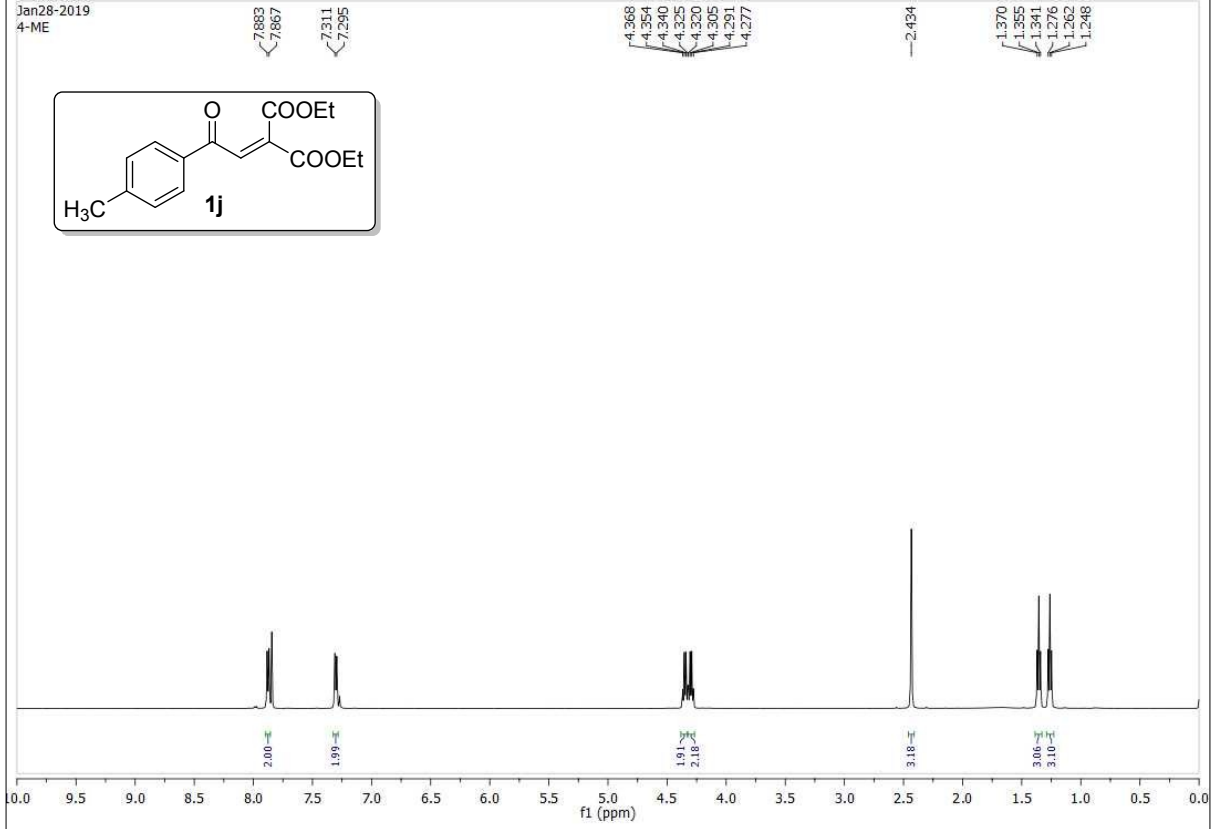

AS-4-ME  
single pulse decoupled gated NOE

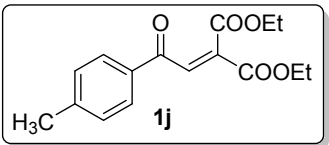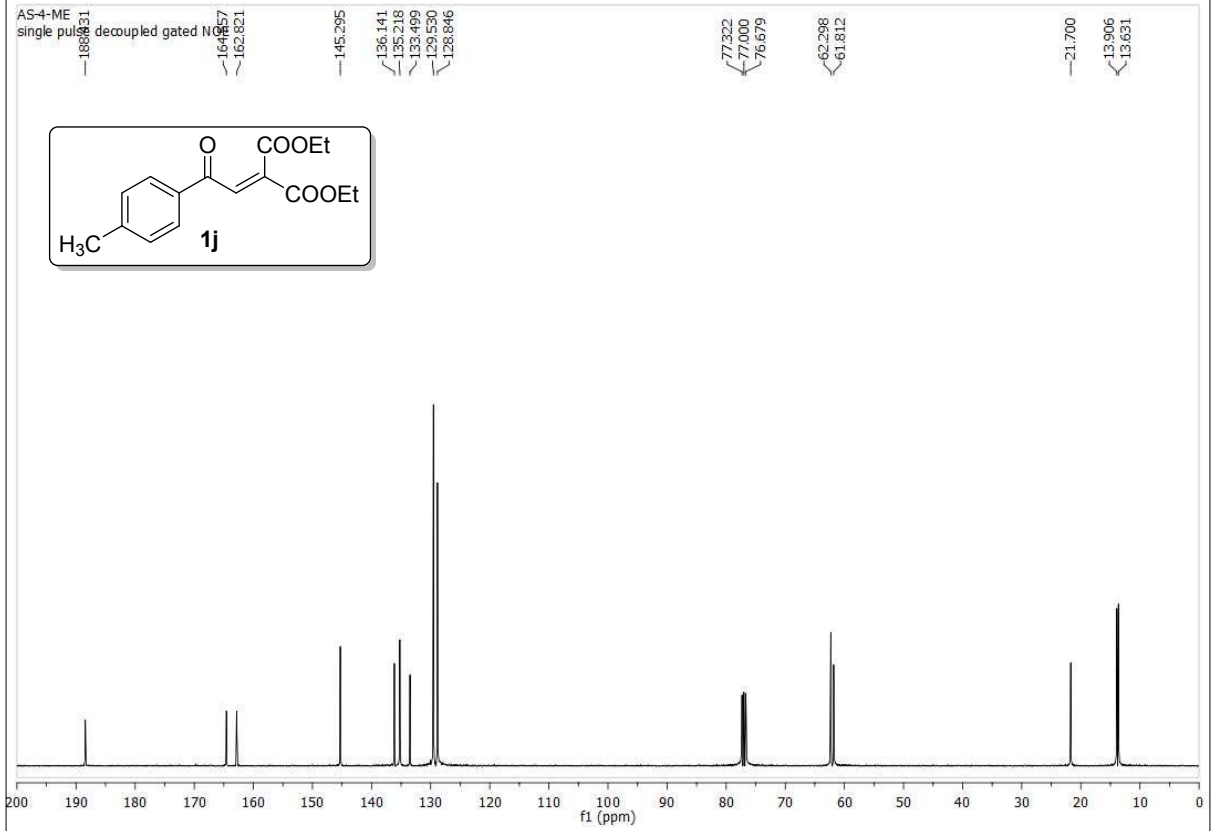



Jan28-2019  
3-NO2

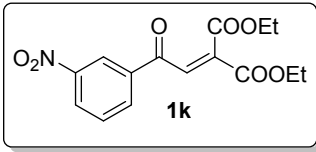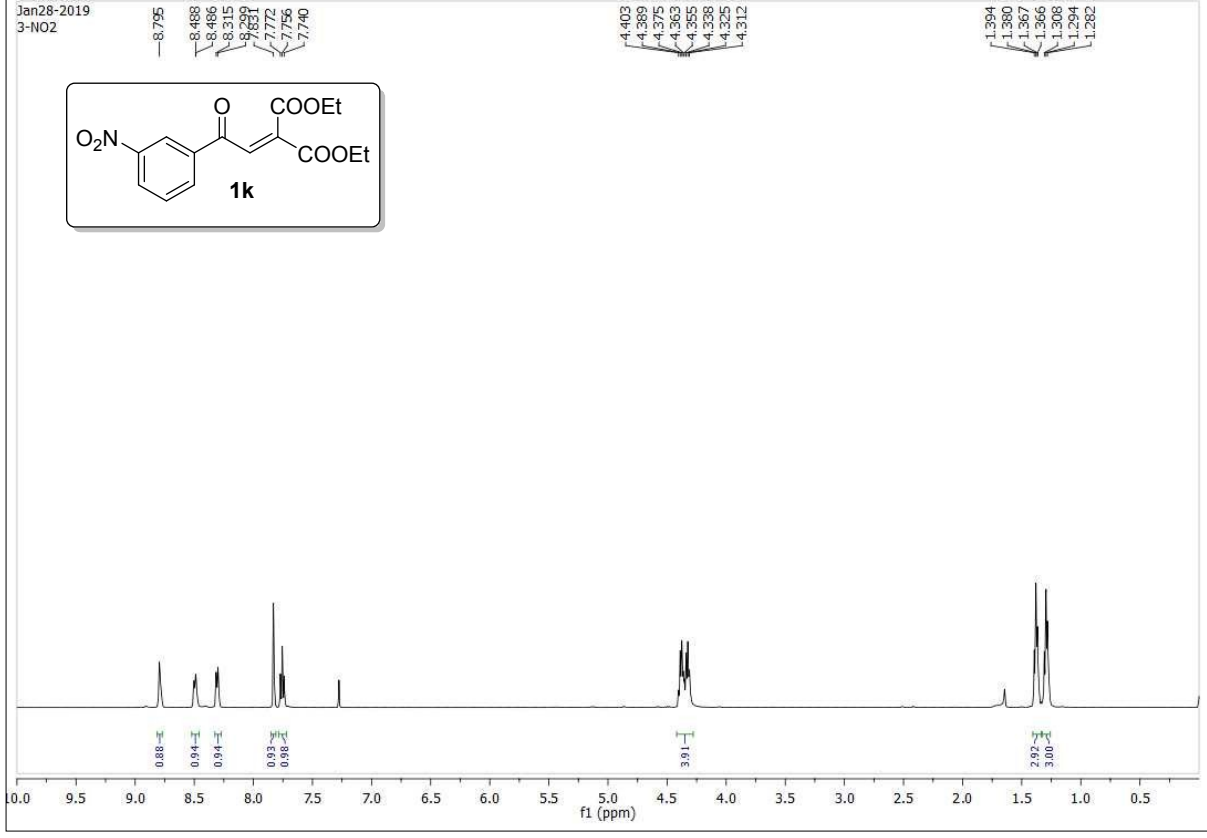

Jan28-2019  
3-NO2

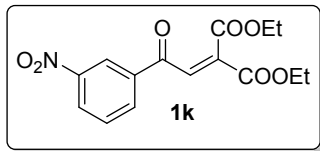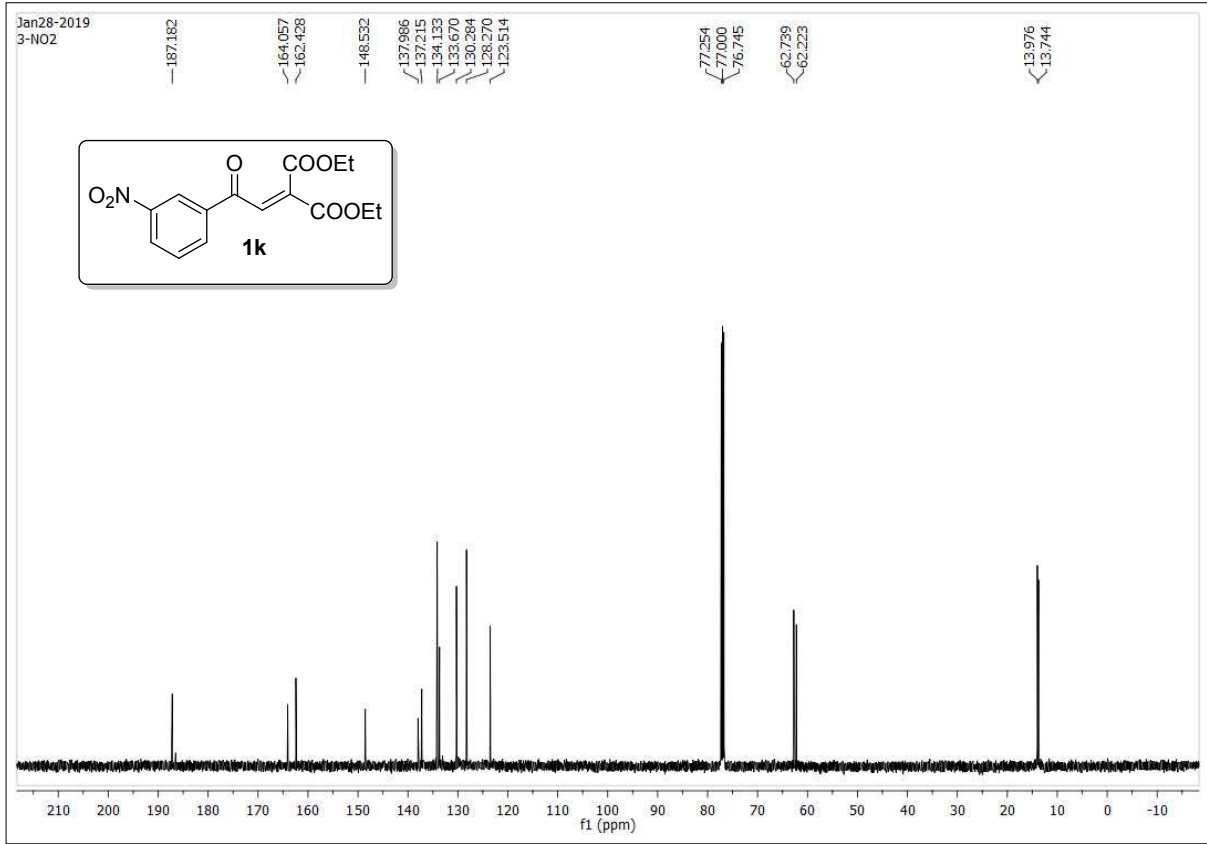

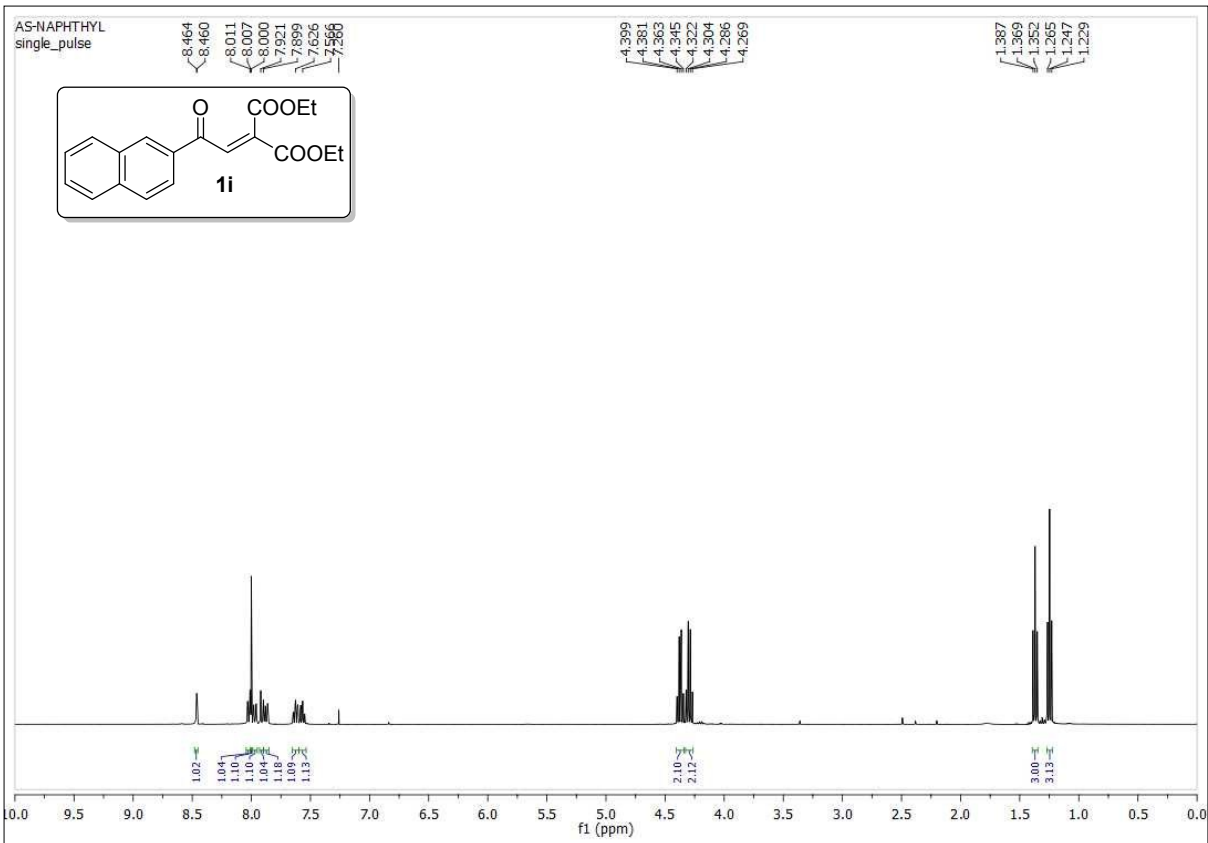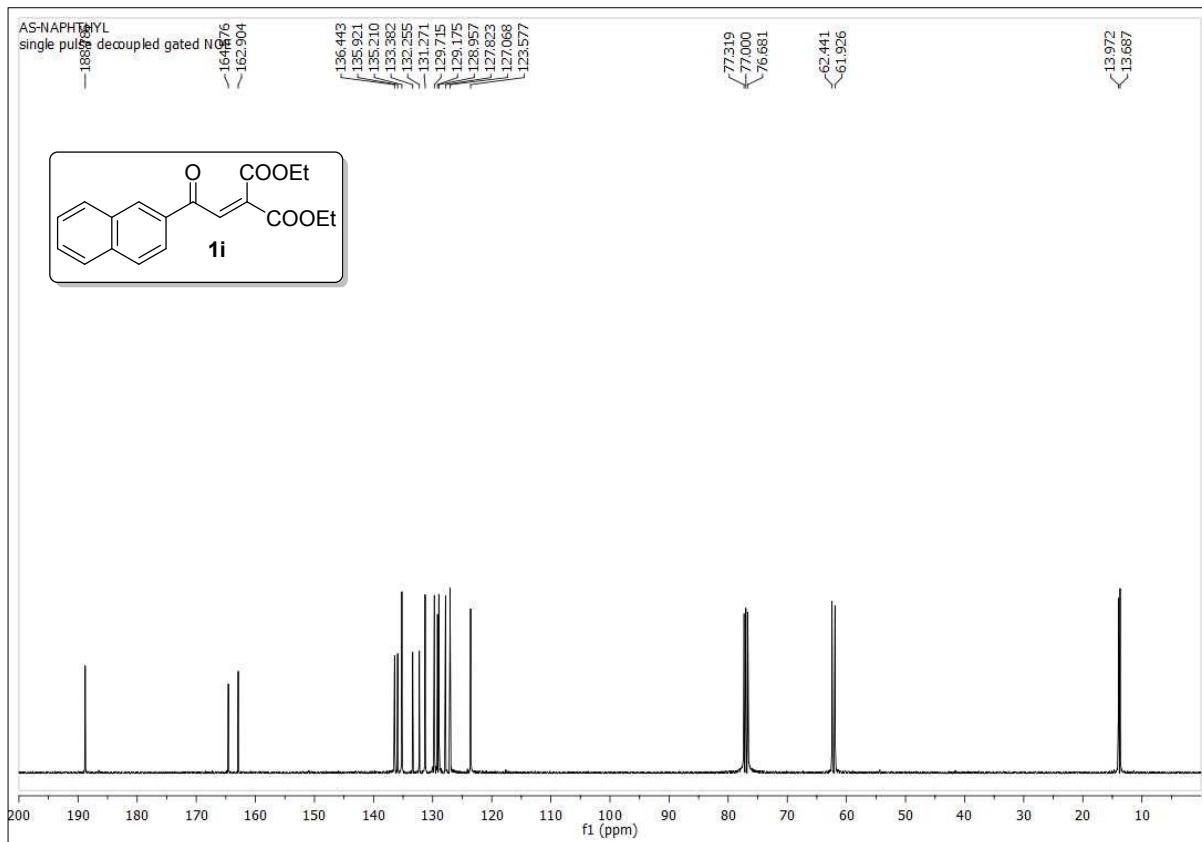

Jan28-2019  
THIENYL

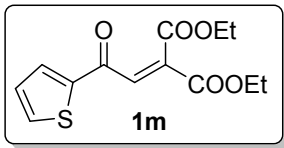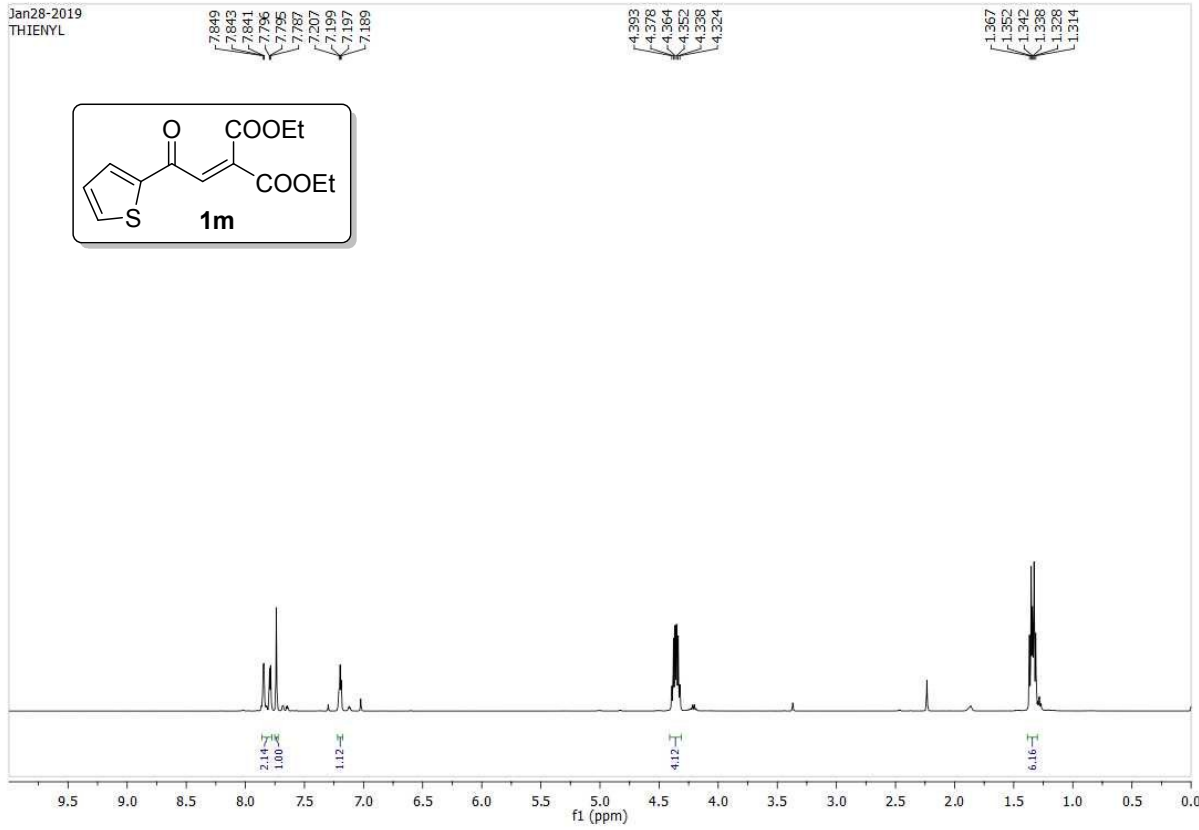

Jan28-2019  
THIENYL

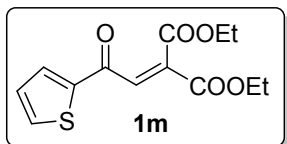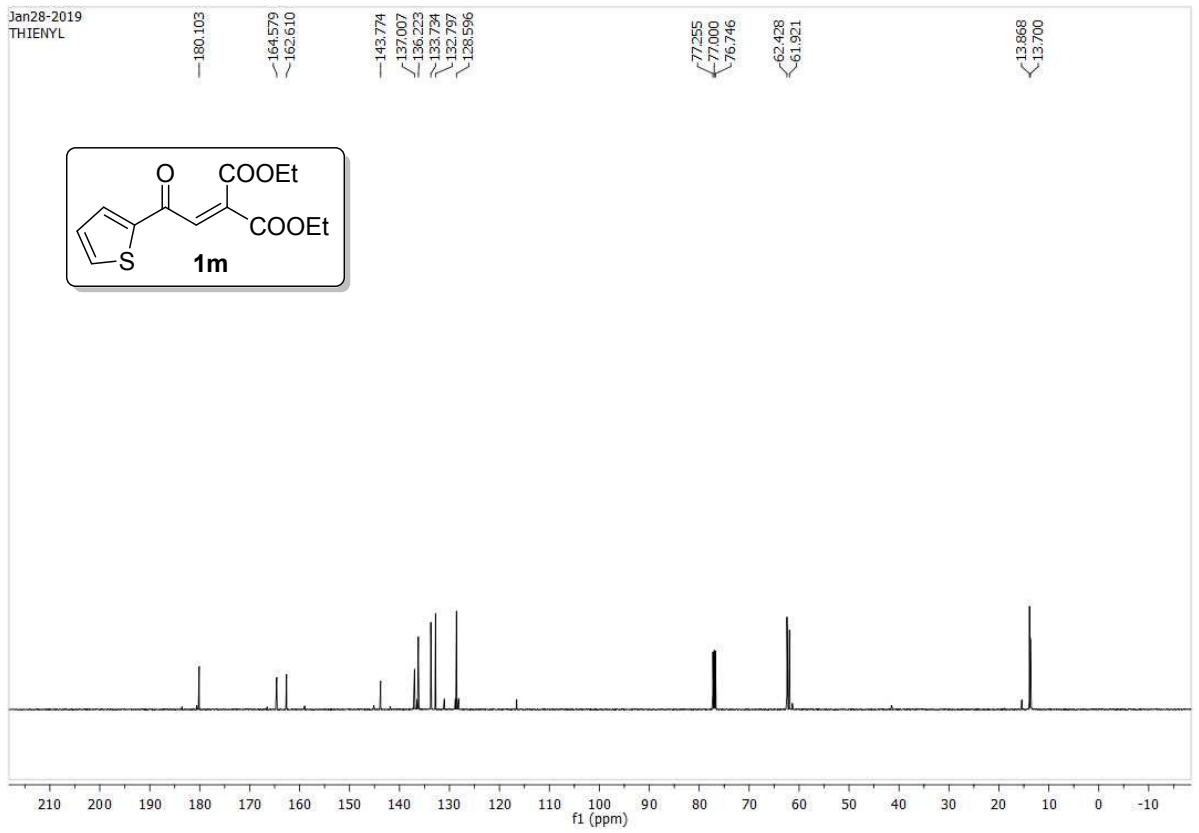

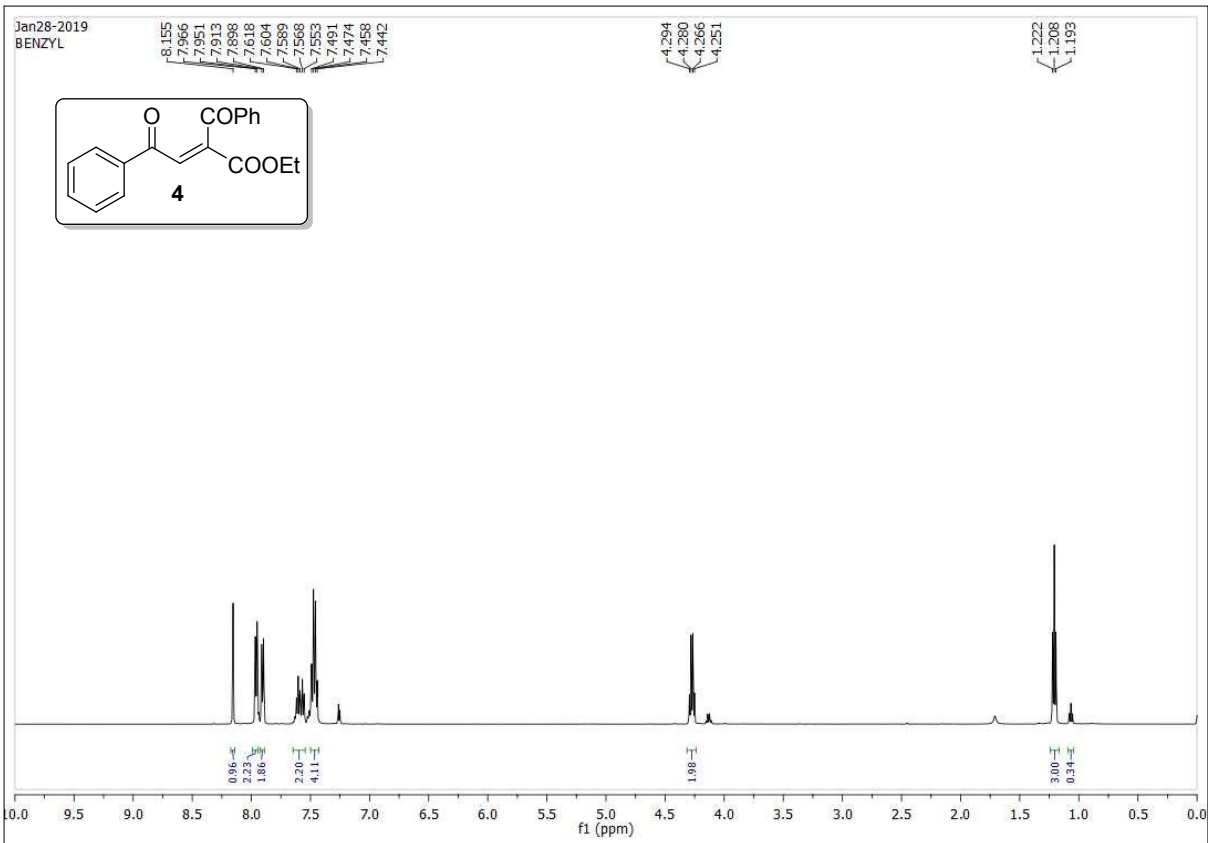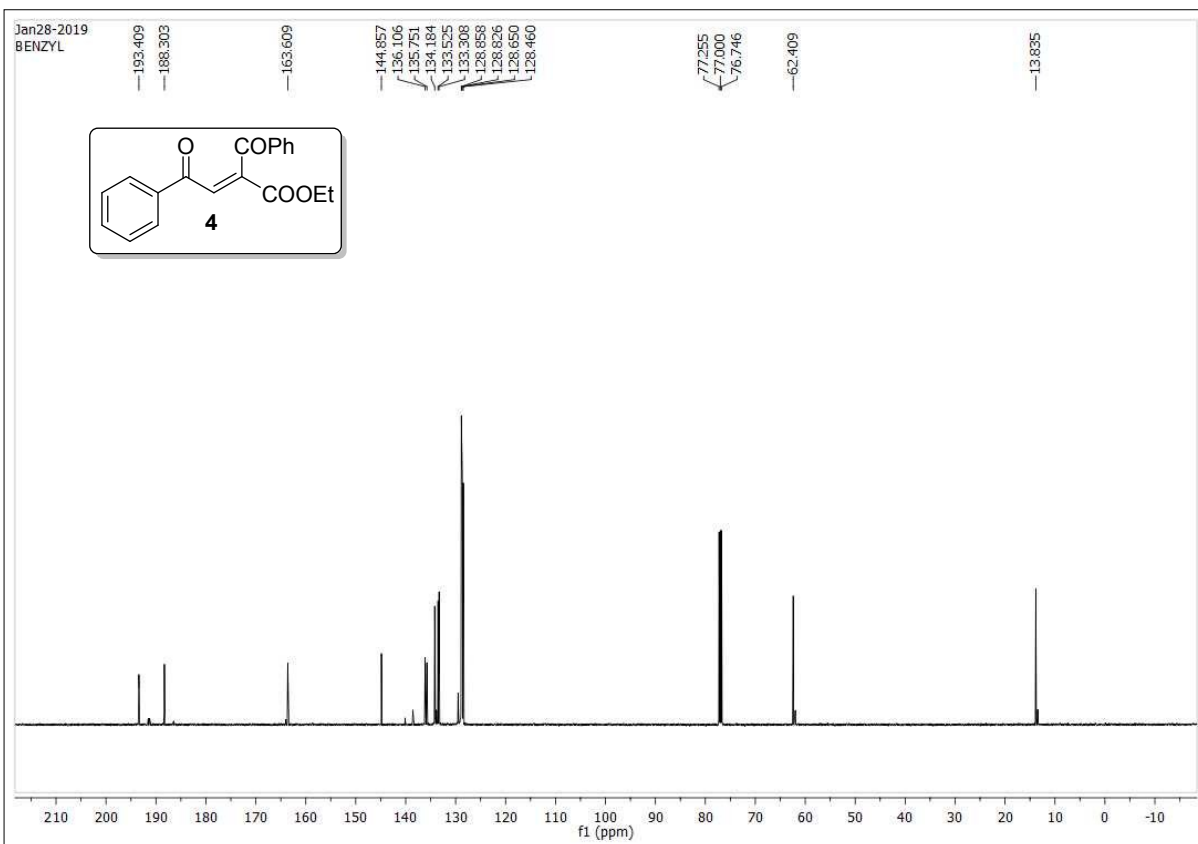

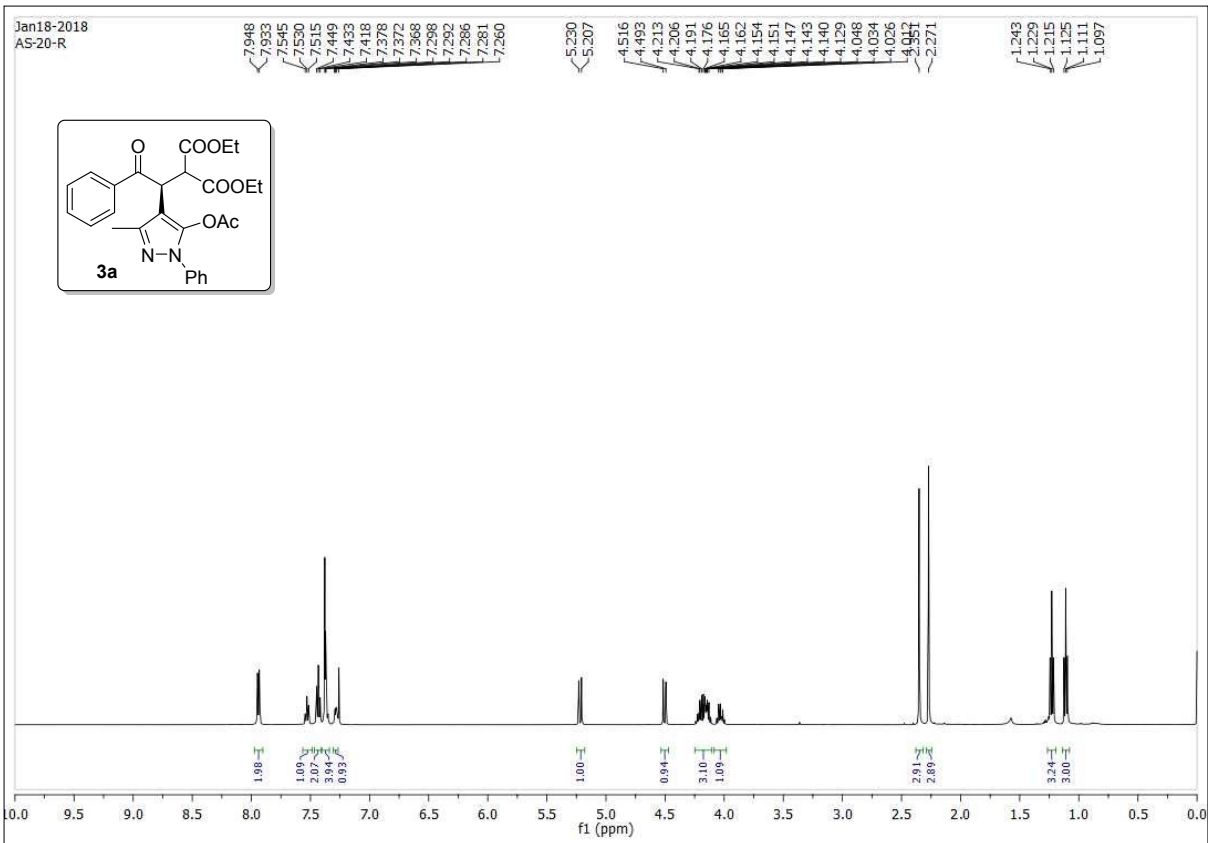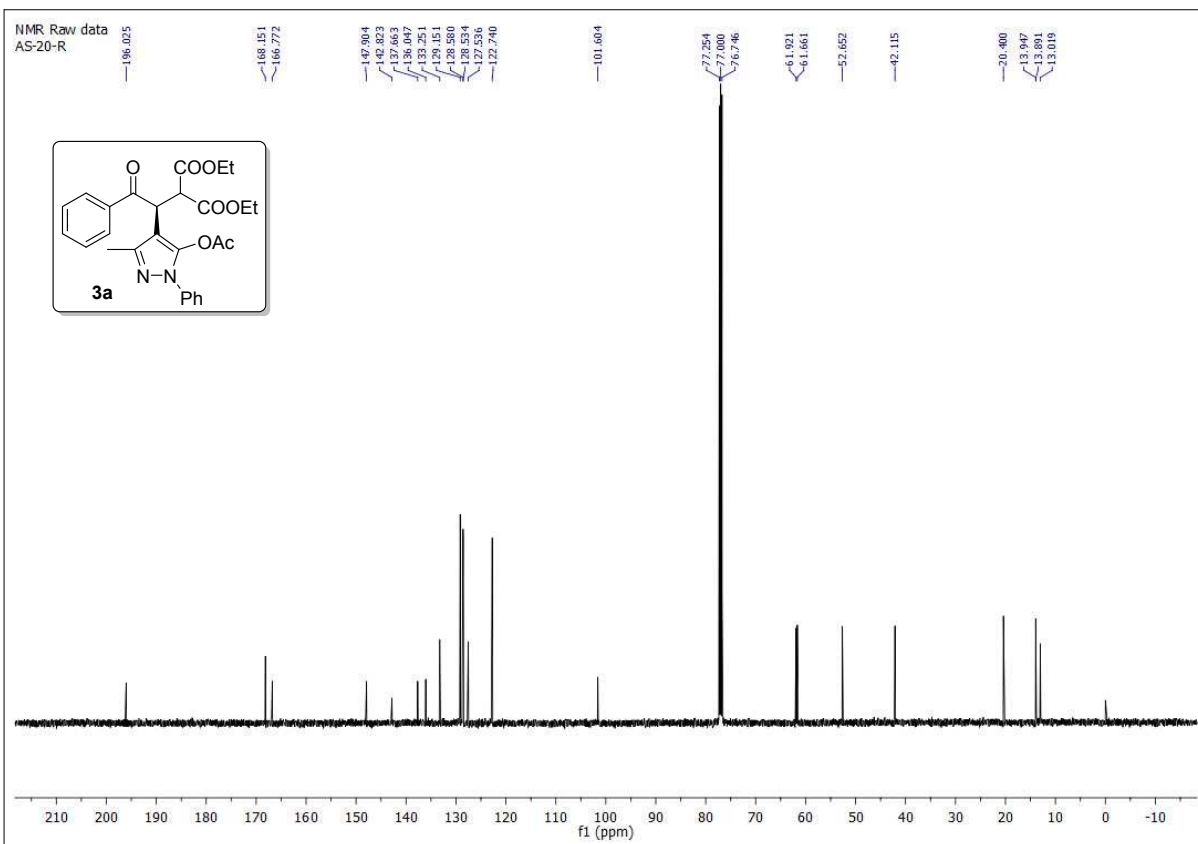

Oct25-2018  
AS-2,4-DICHLORO

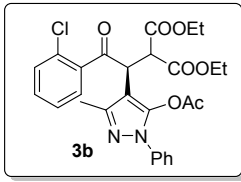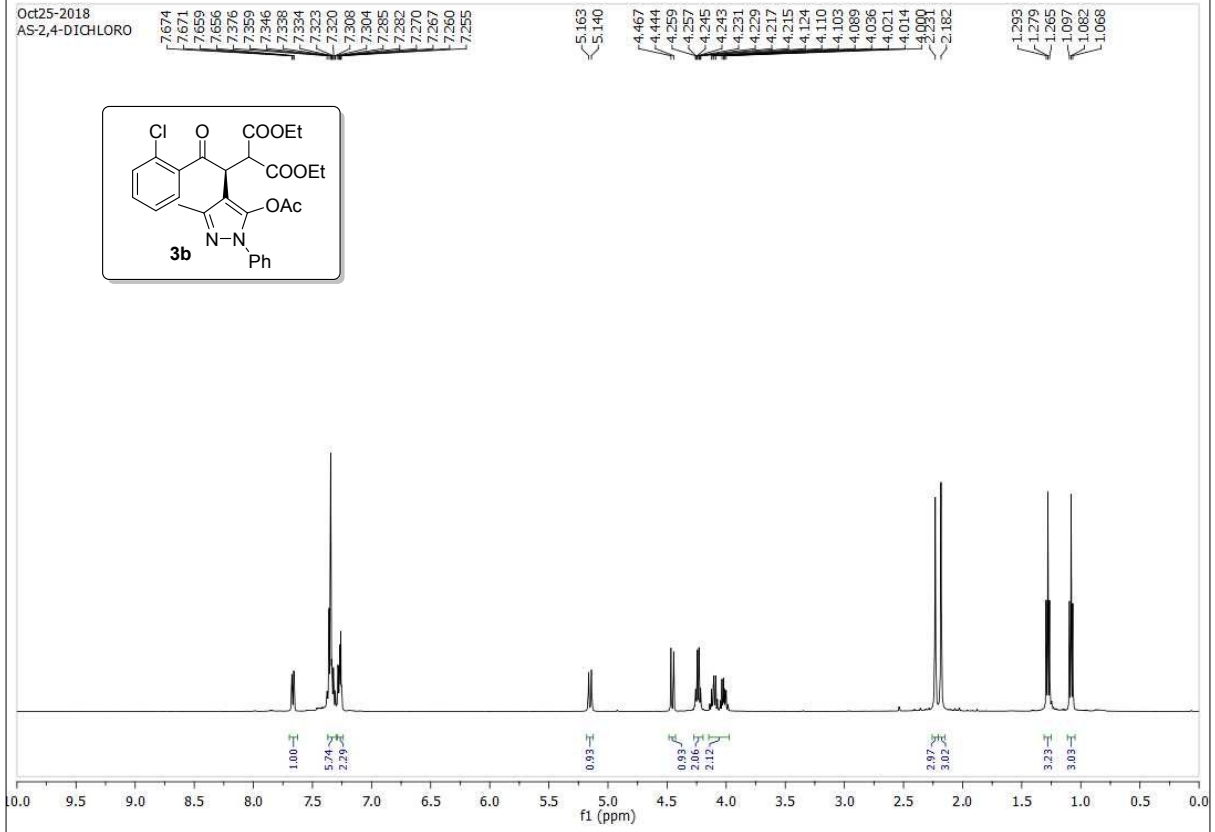

Oct25-2018  
AS-2,4-DICHLORO

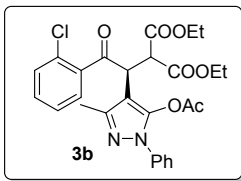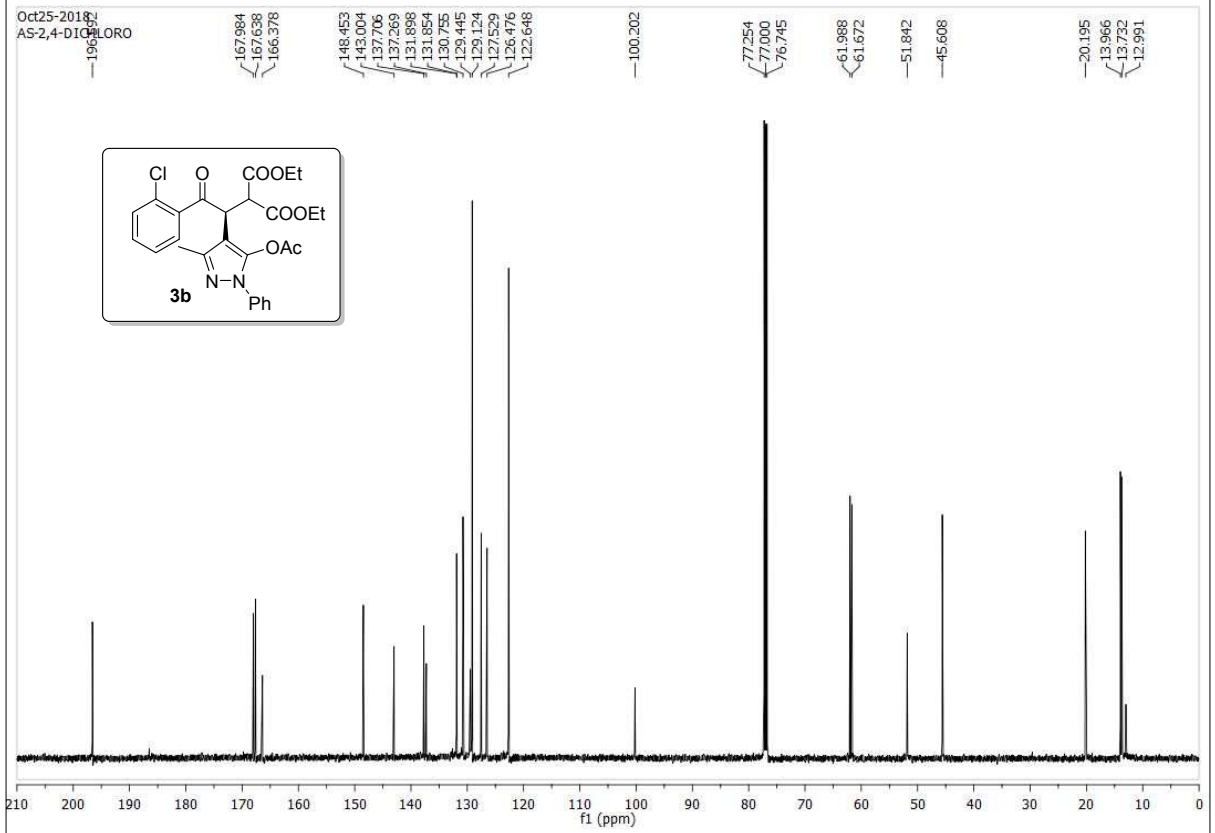

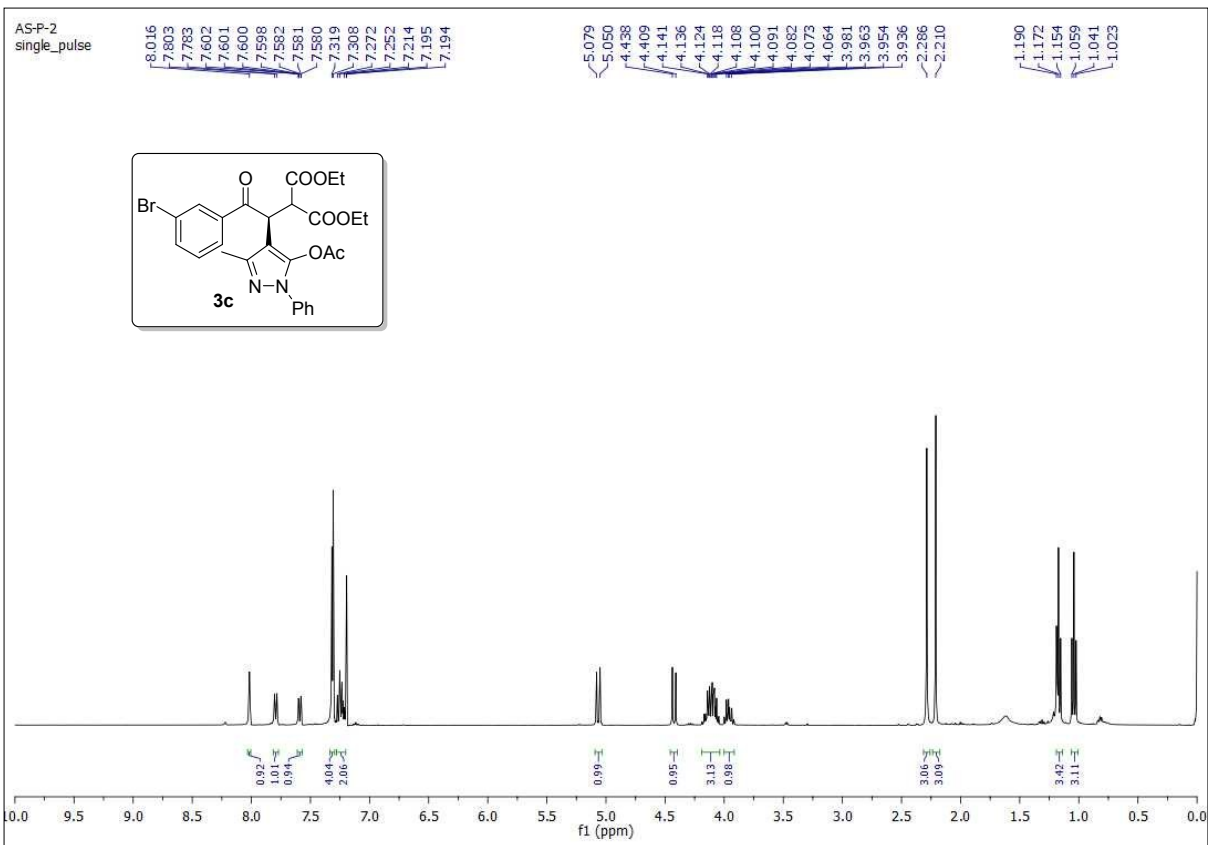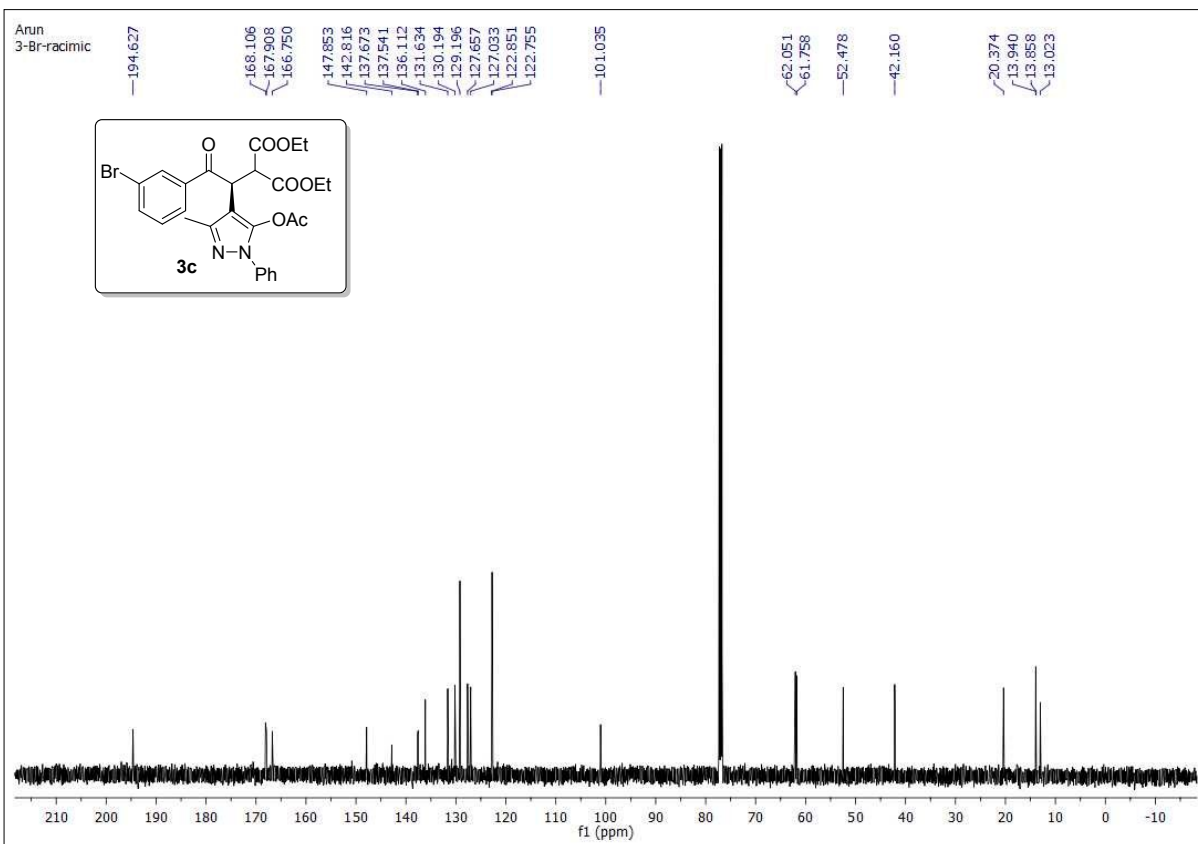

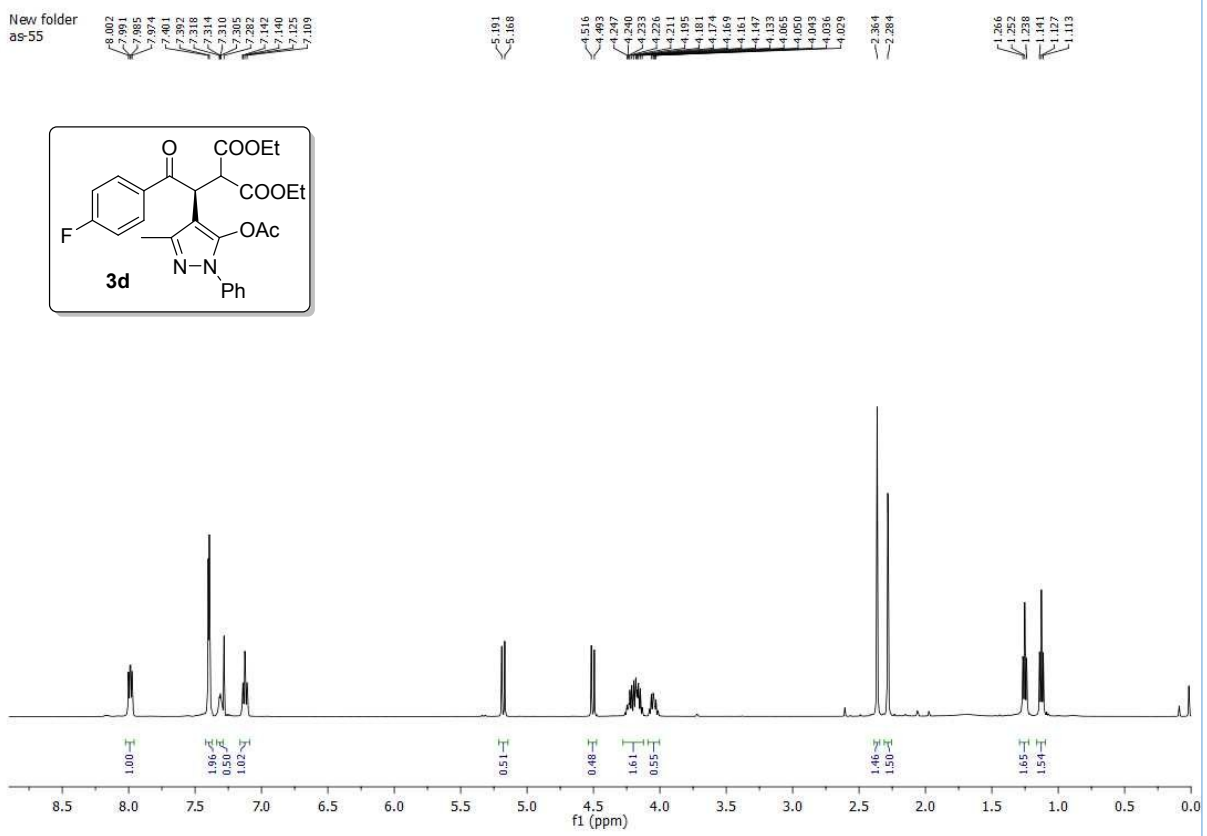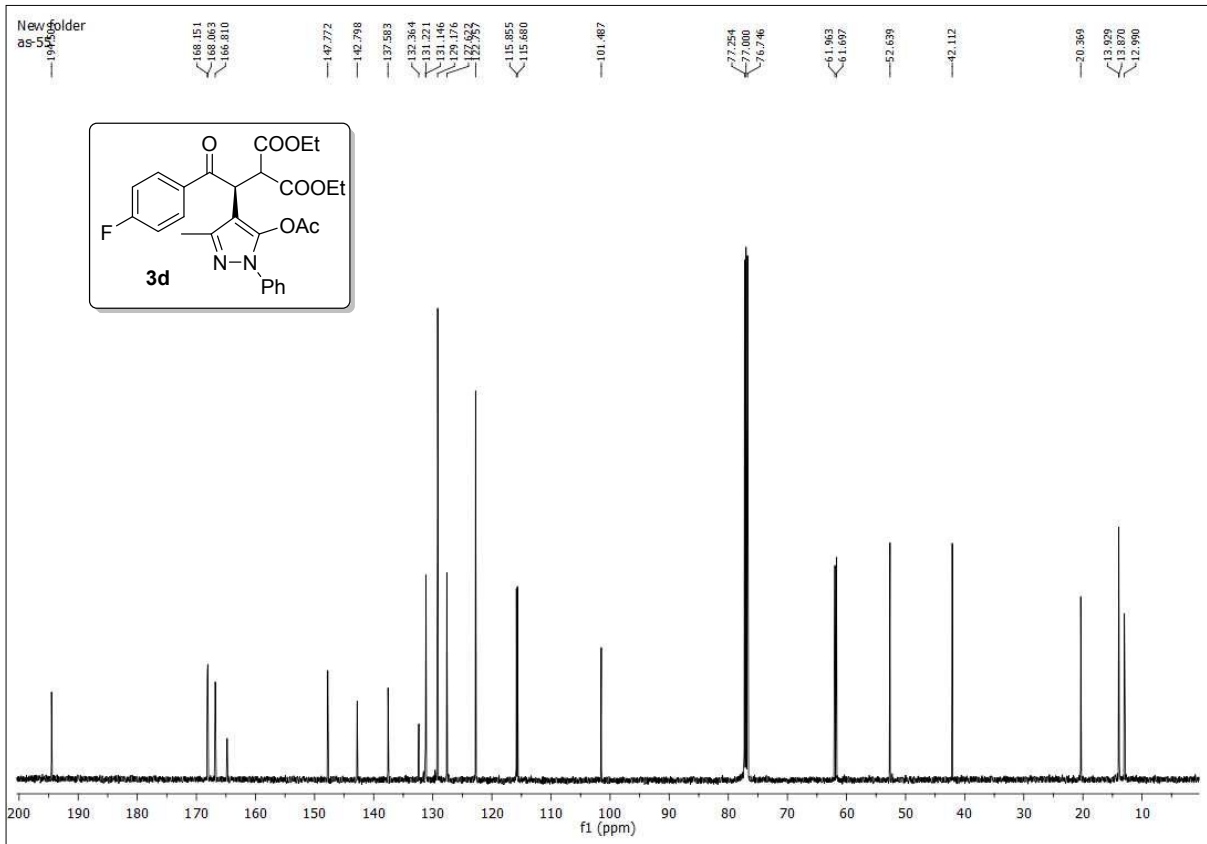



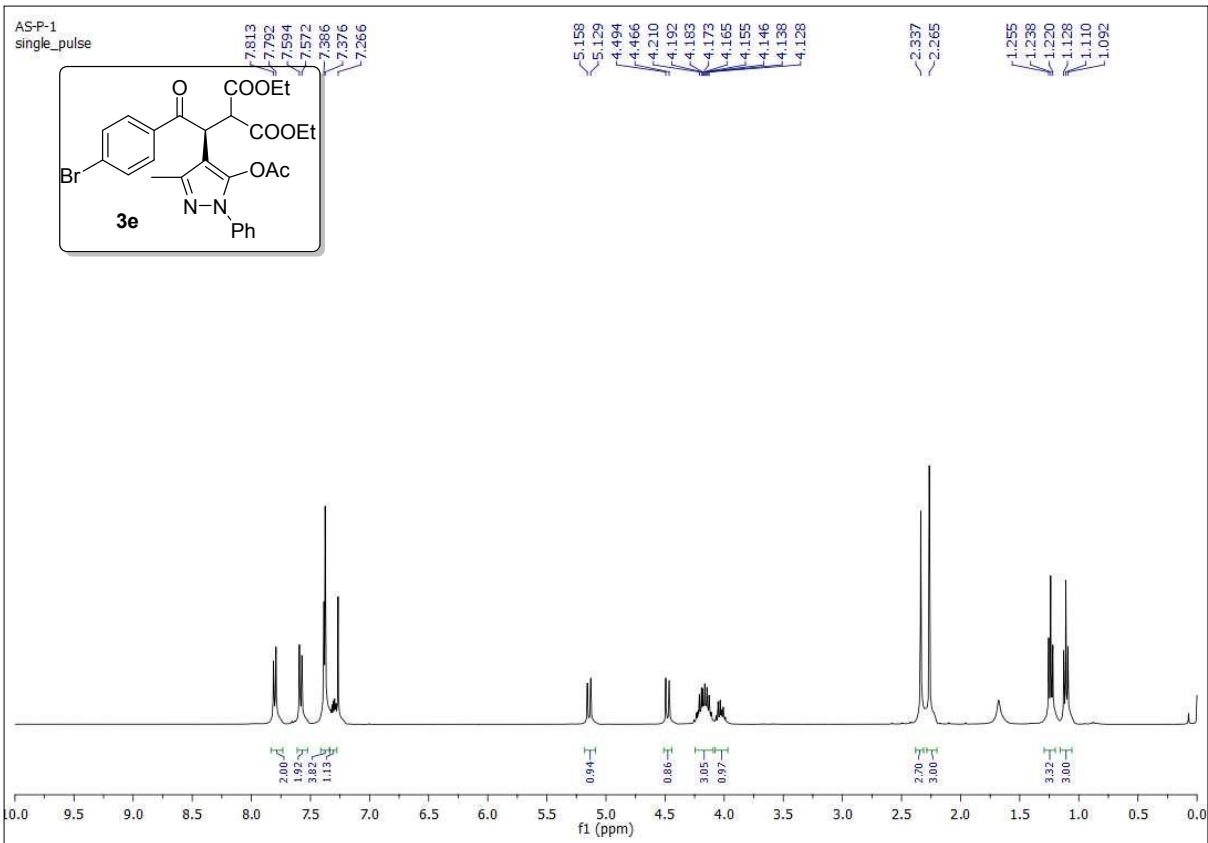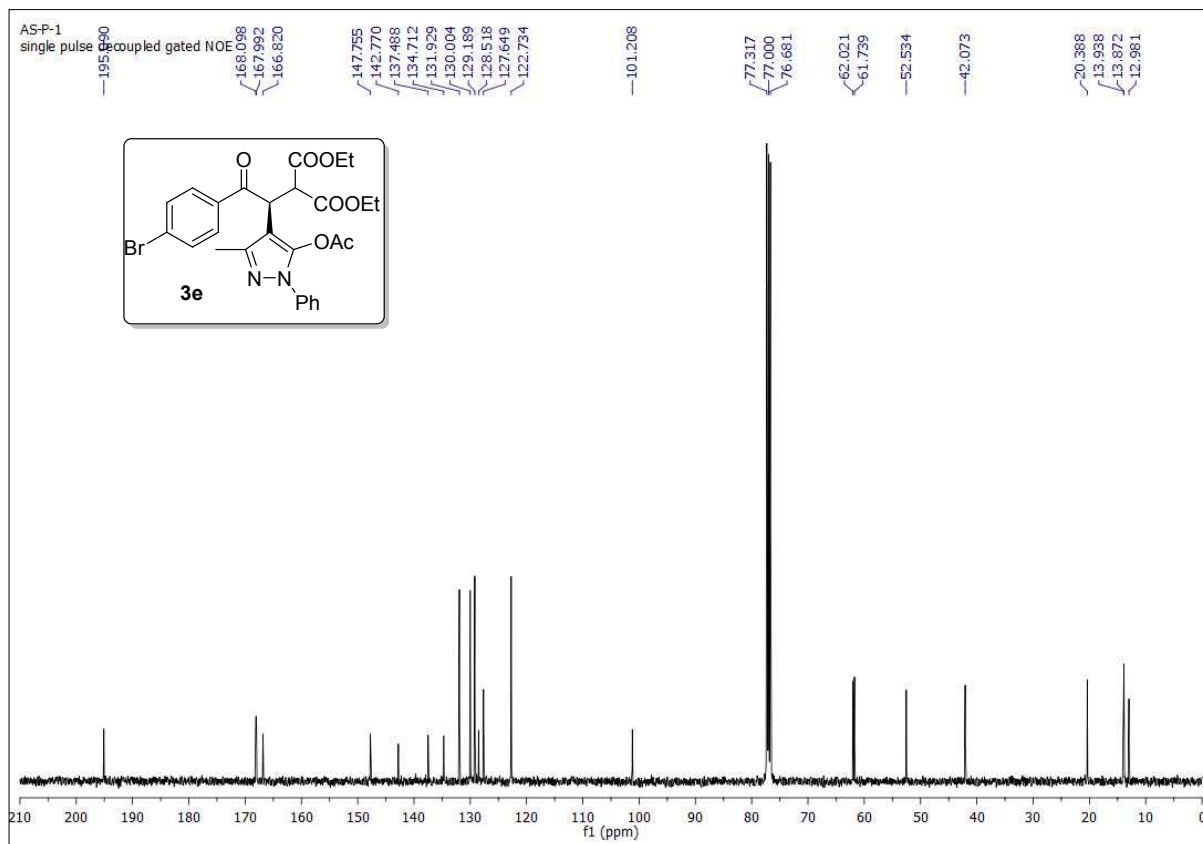

Arun  
p-3

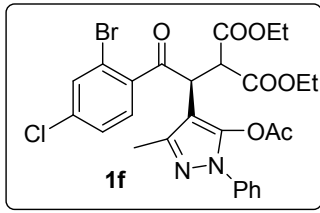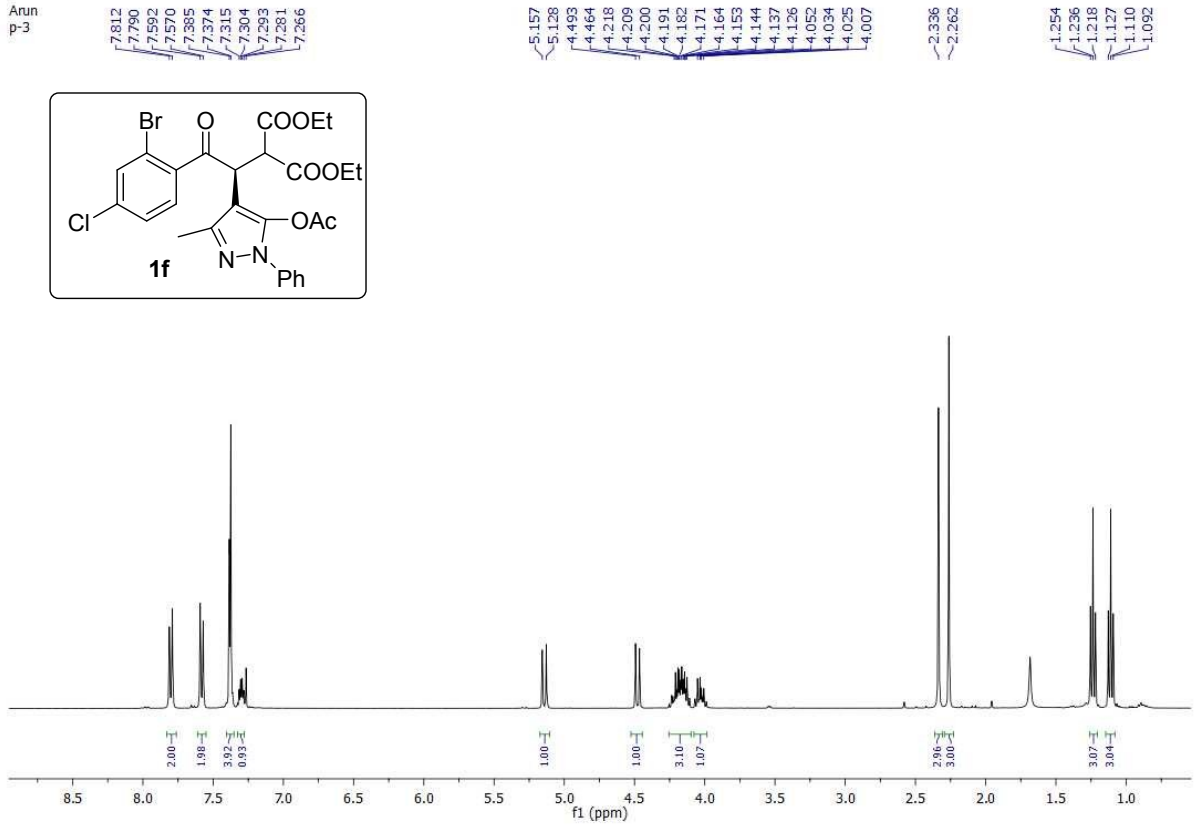

Arun  
as-p3

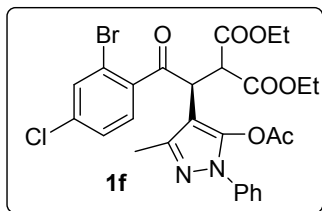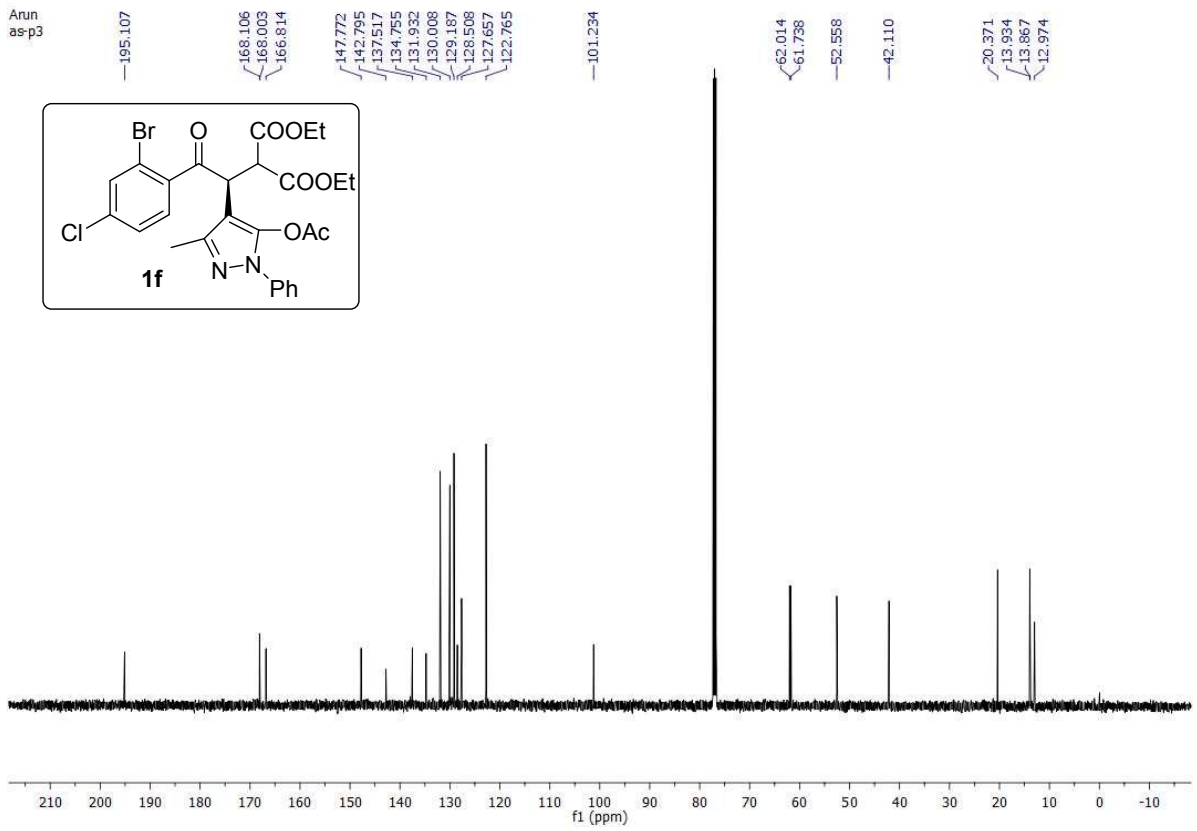

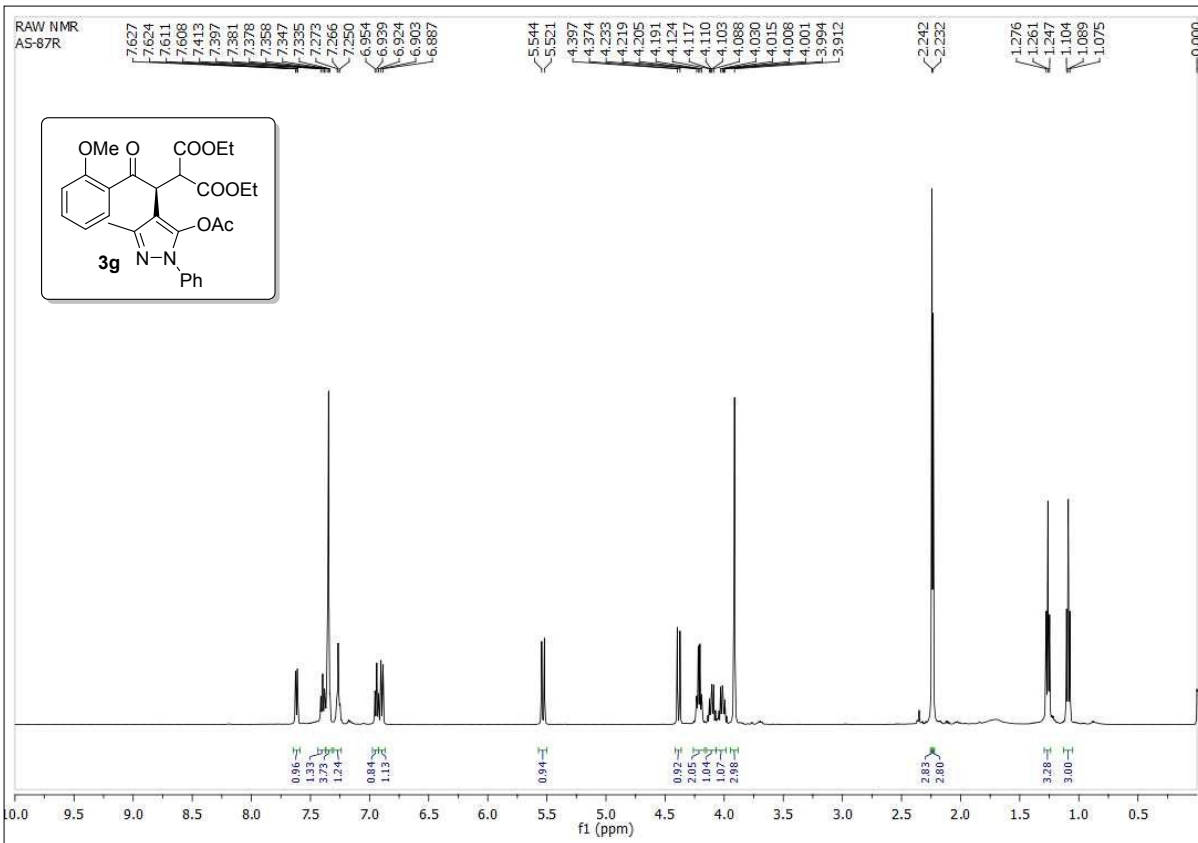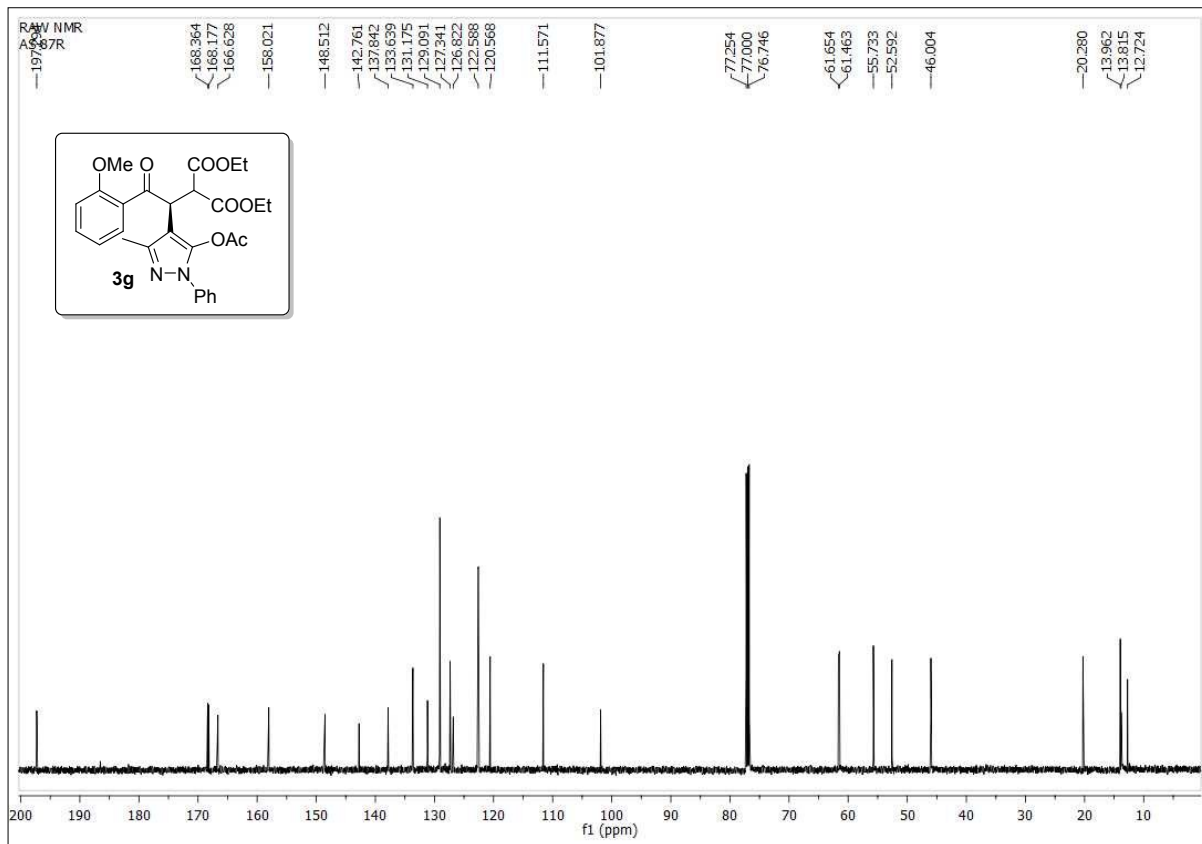

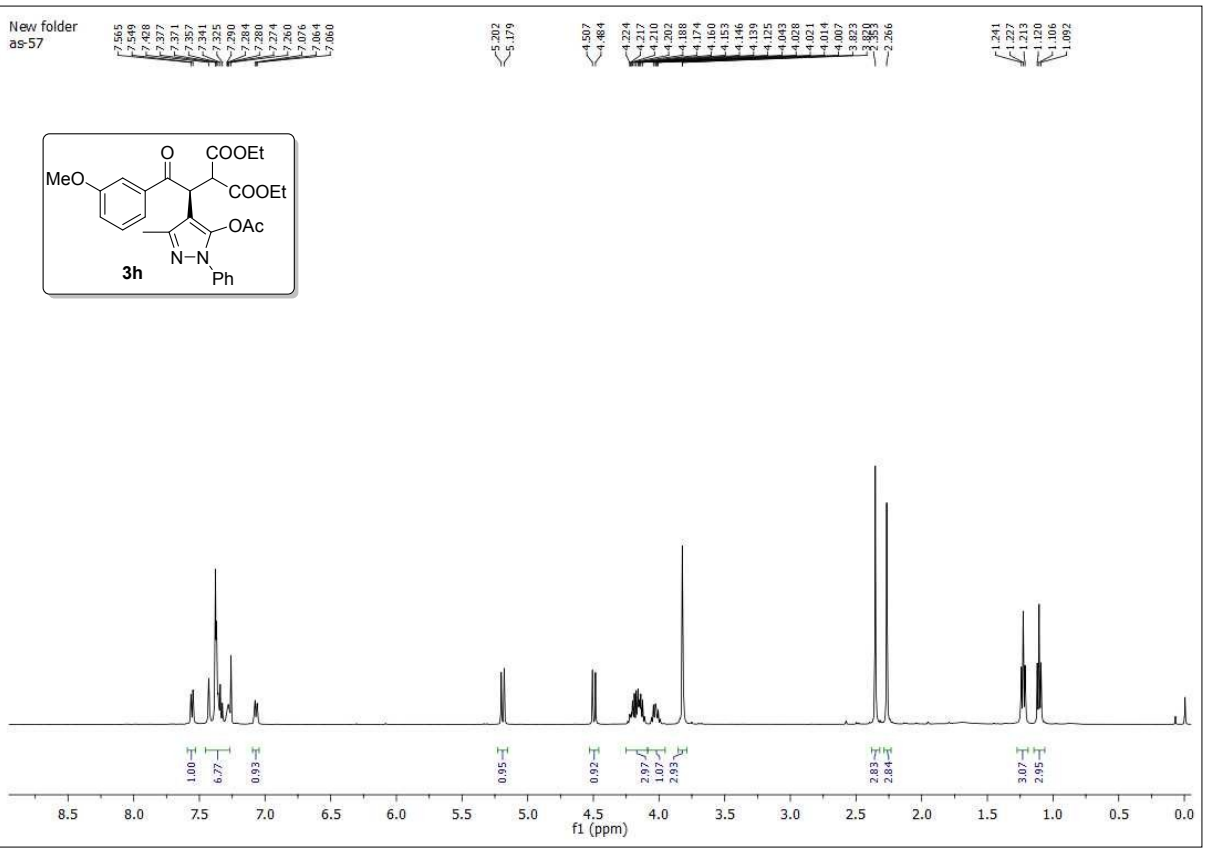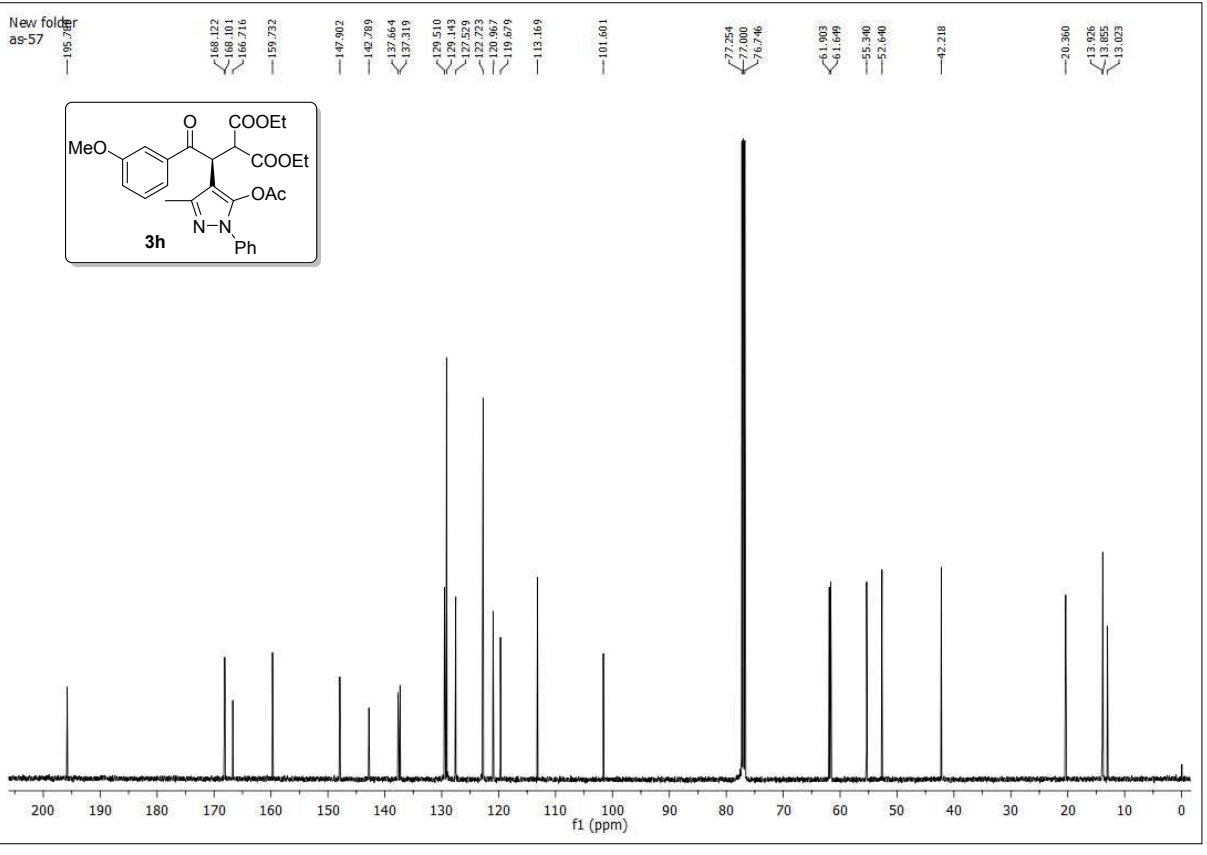

Sep06-2018  
AS-56

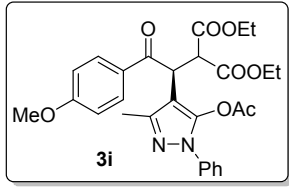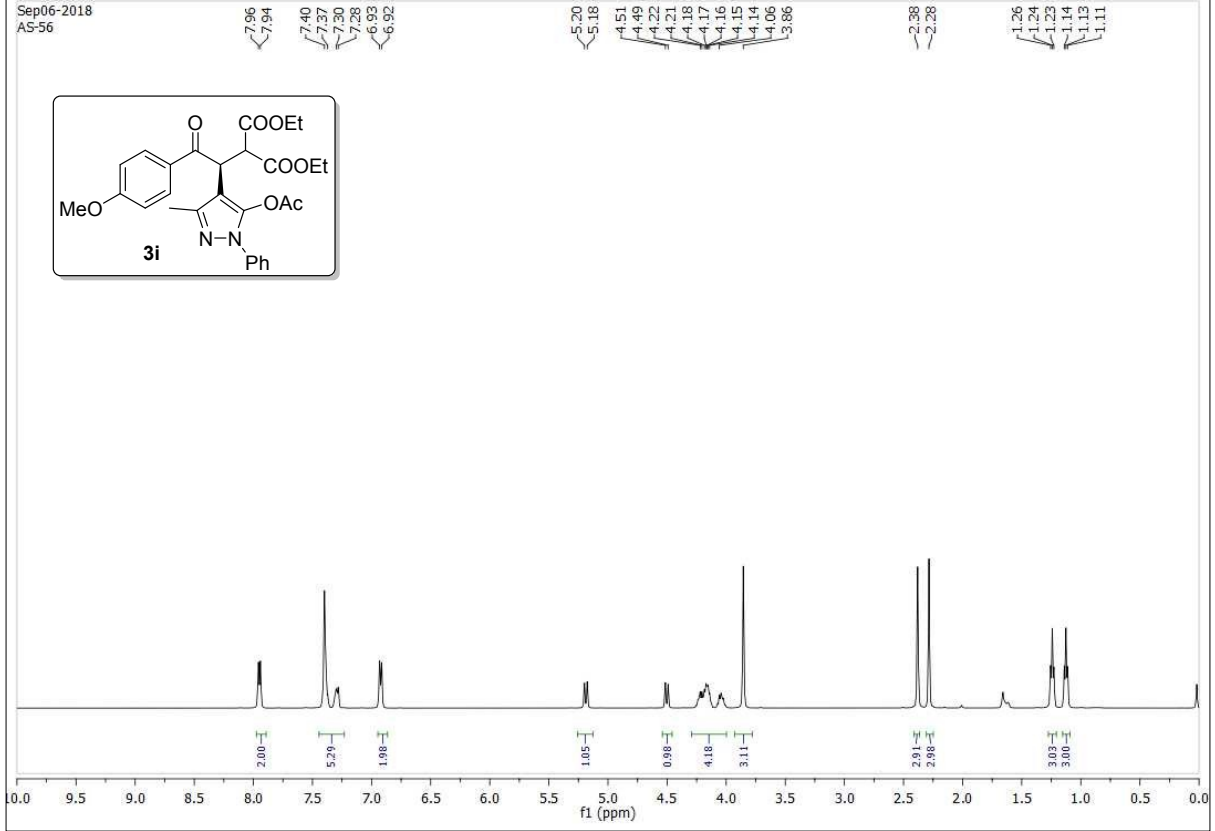

Sep06-2018  
AS-56

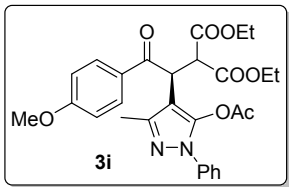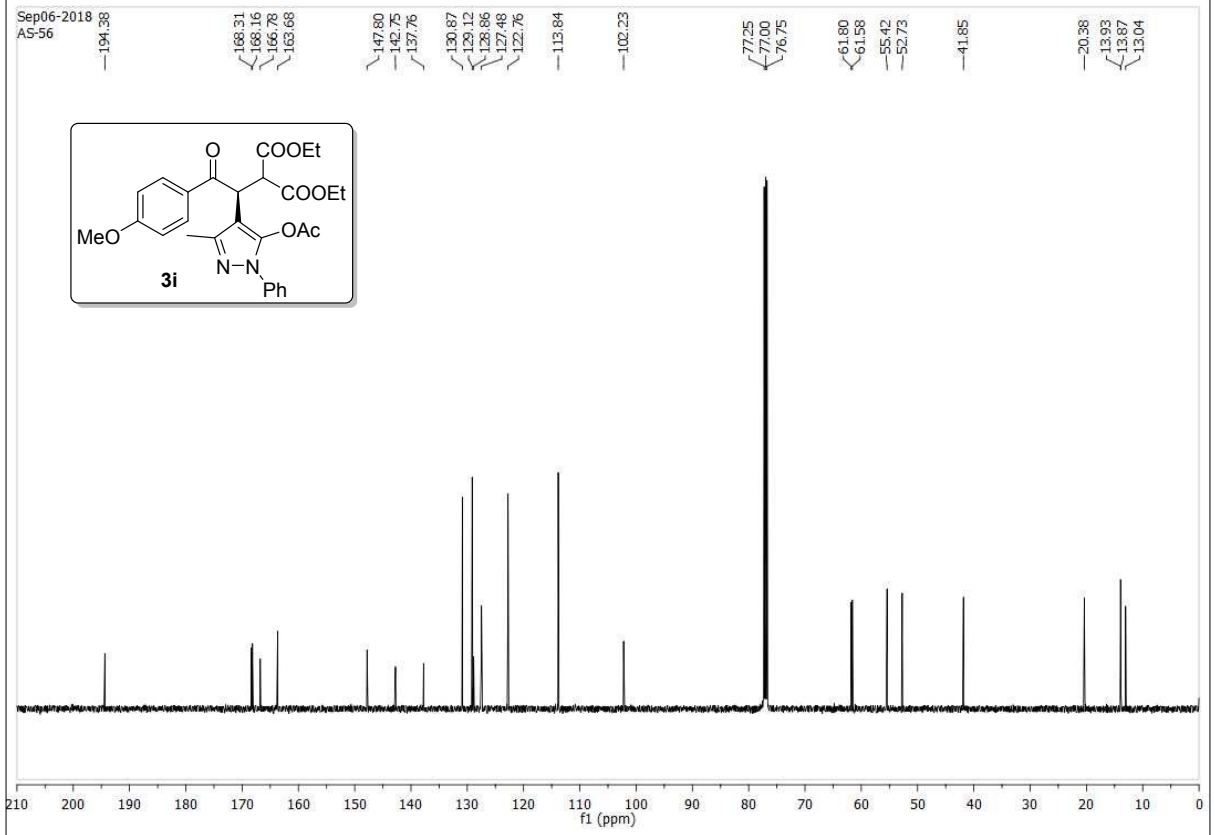

Oct05-2018  
AS-88

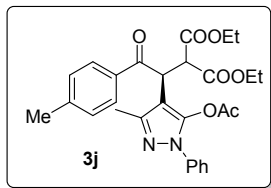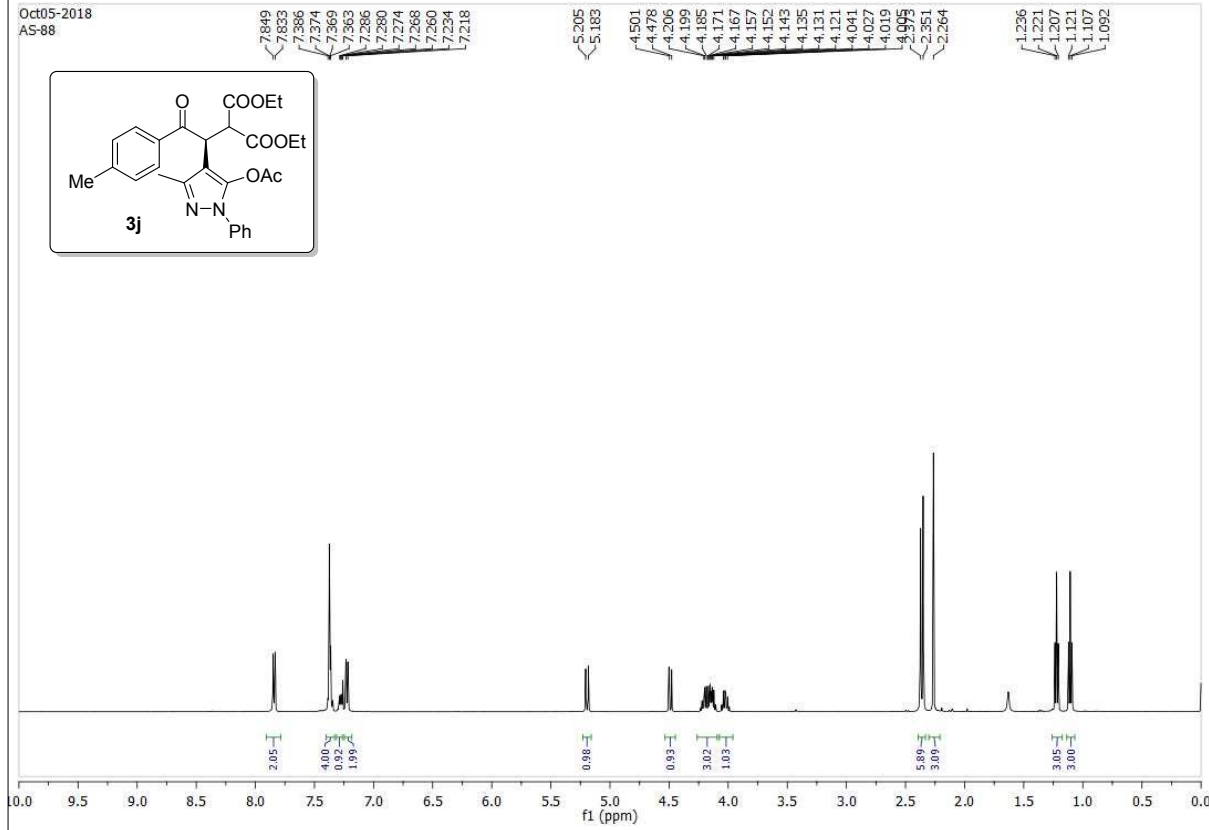

Oct05-2018  
AS-88

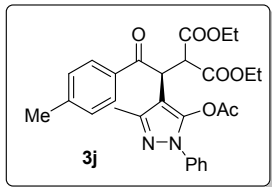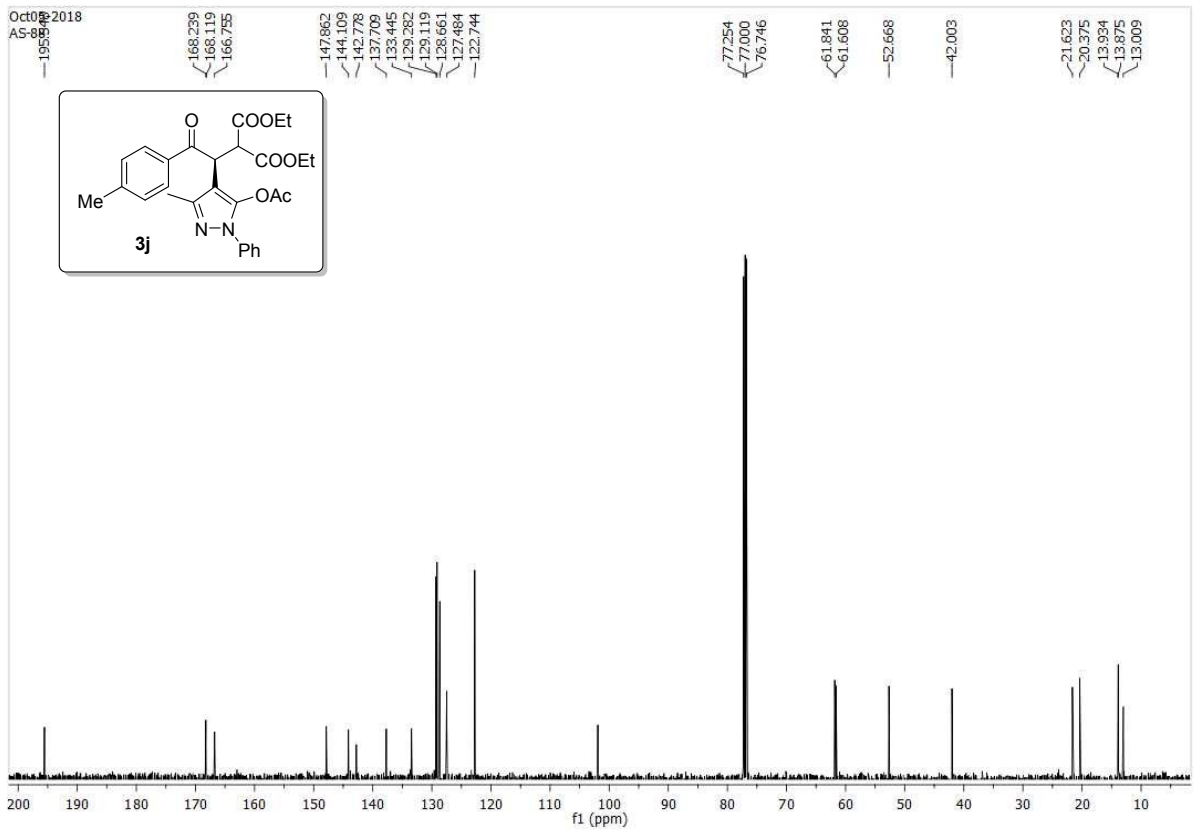

Oct16-2018  
3-NITRO-R

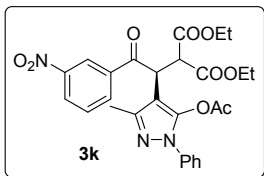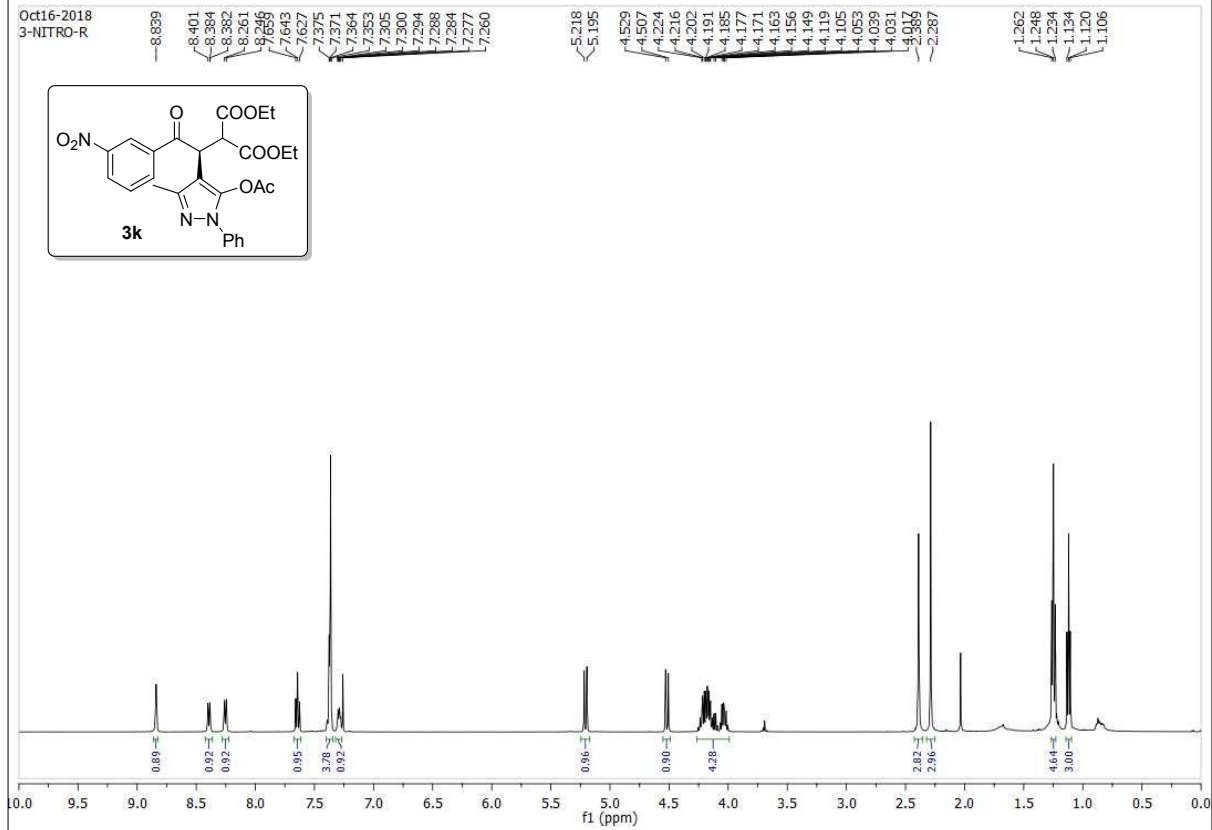

Oct25-2018  
AS-3-NITRO-R

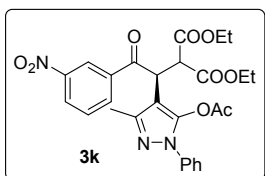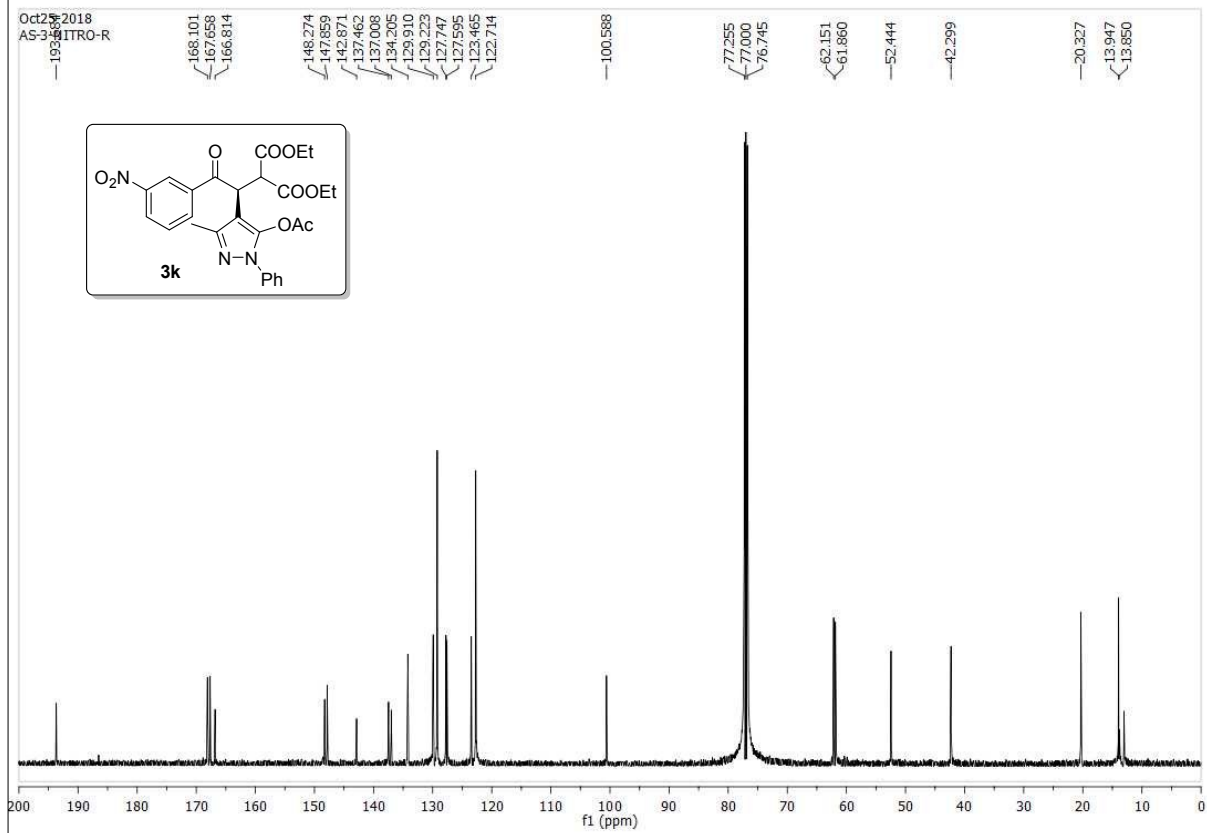

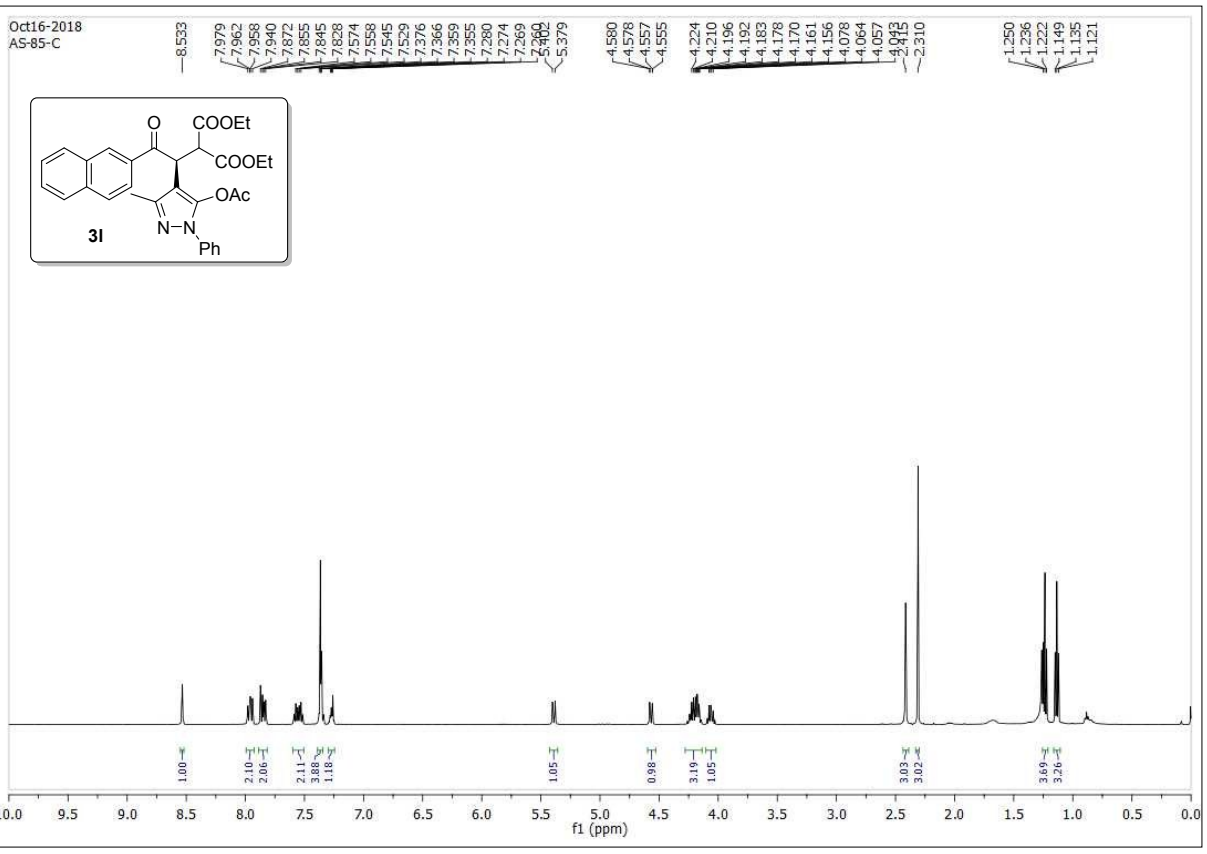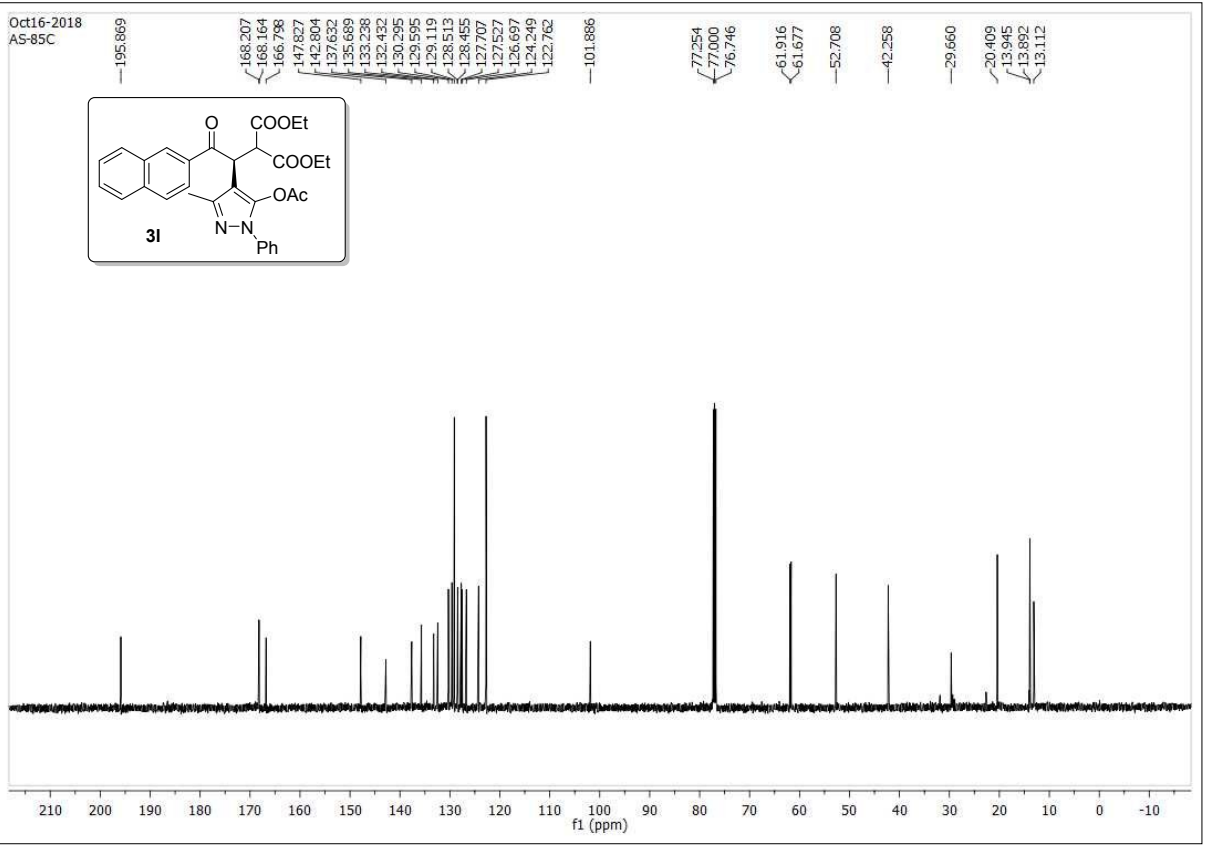



New folder  
AS-58-C

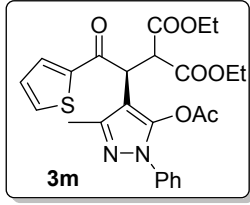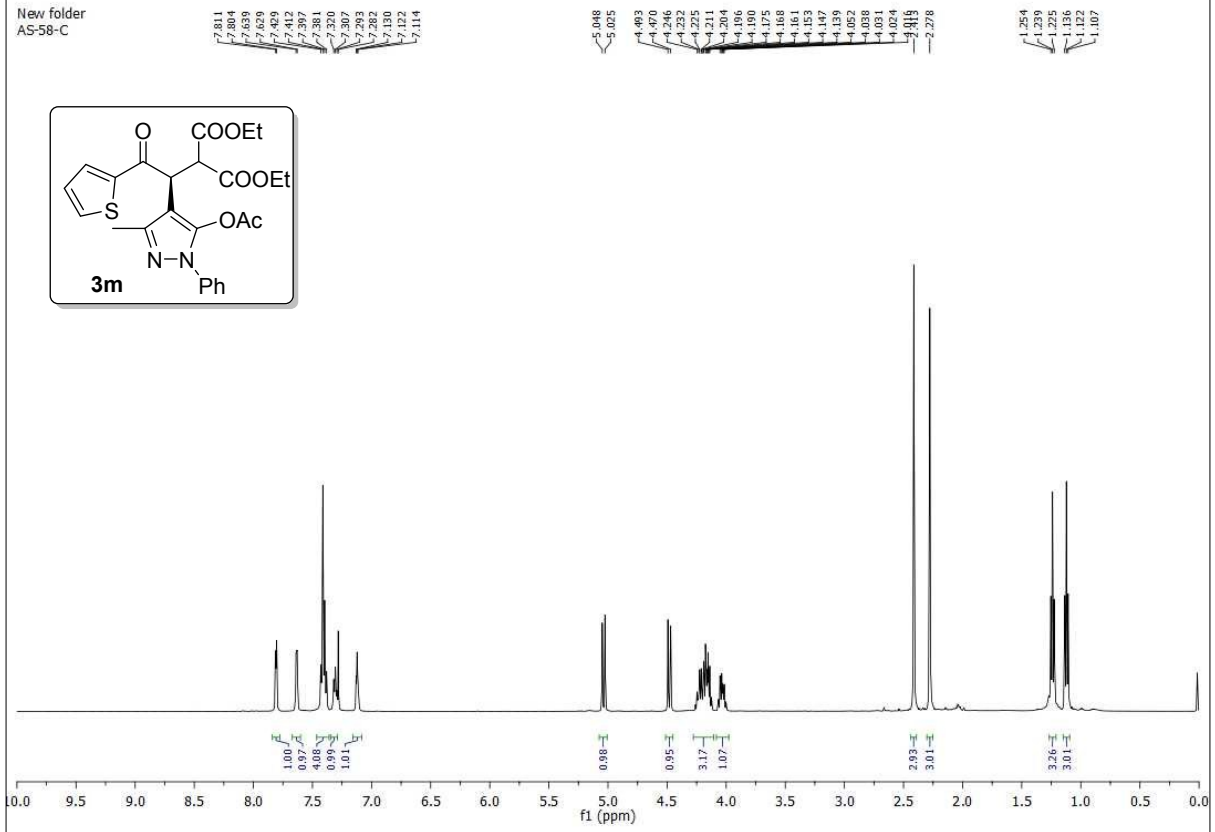

New folder  
AS-58-C

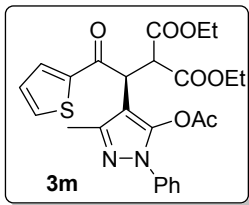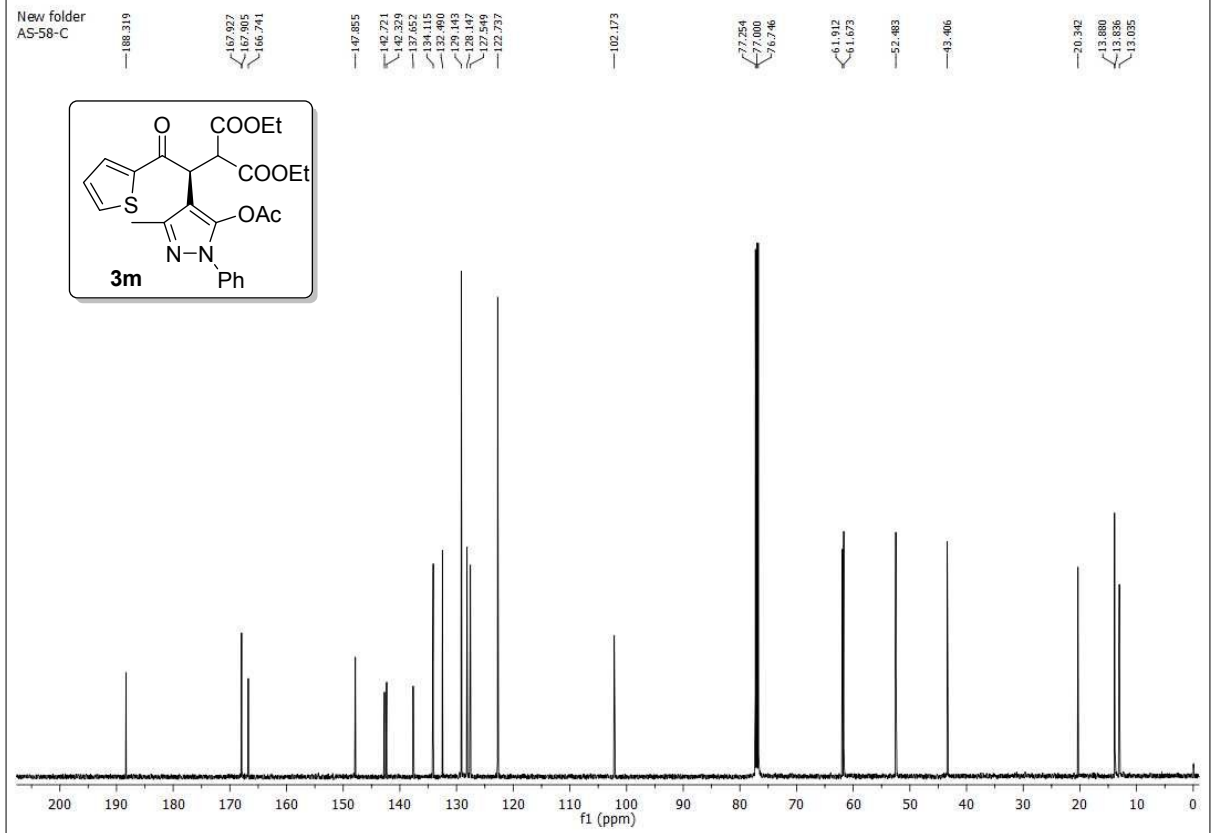

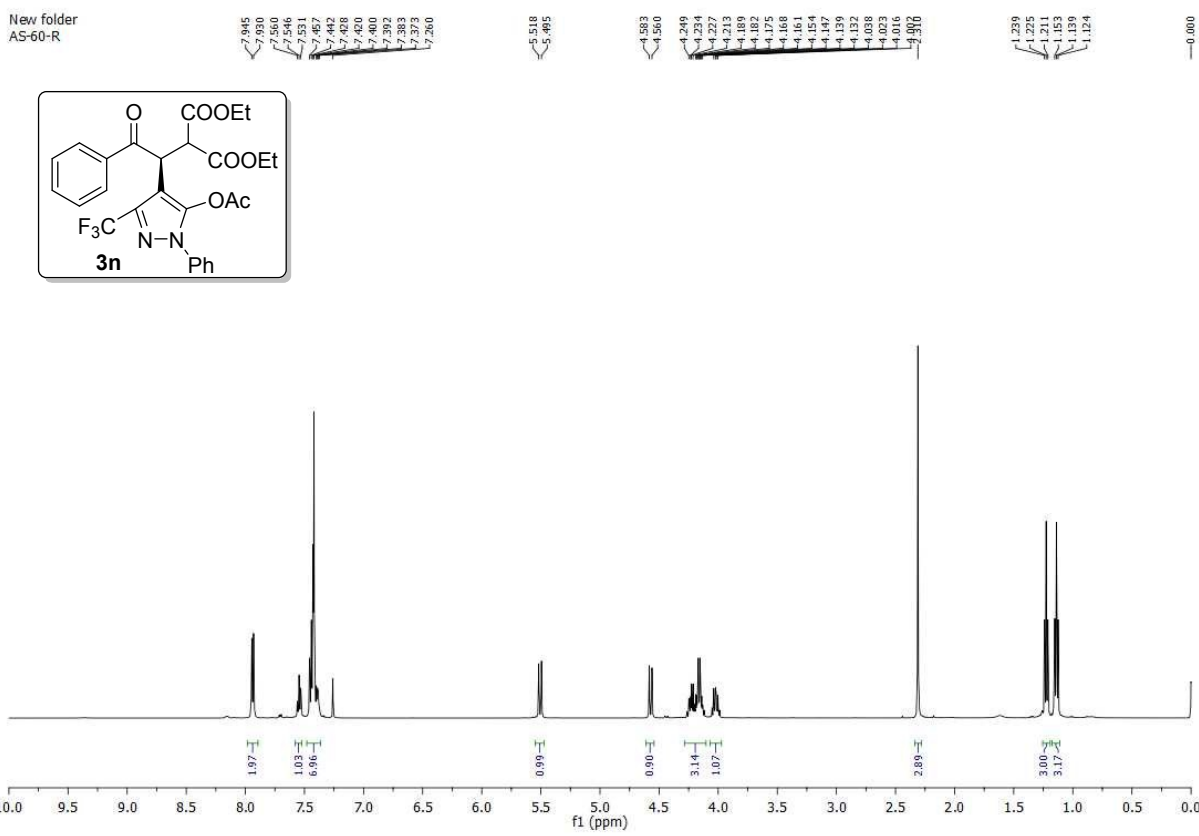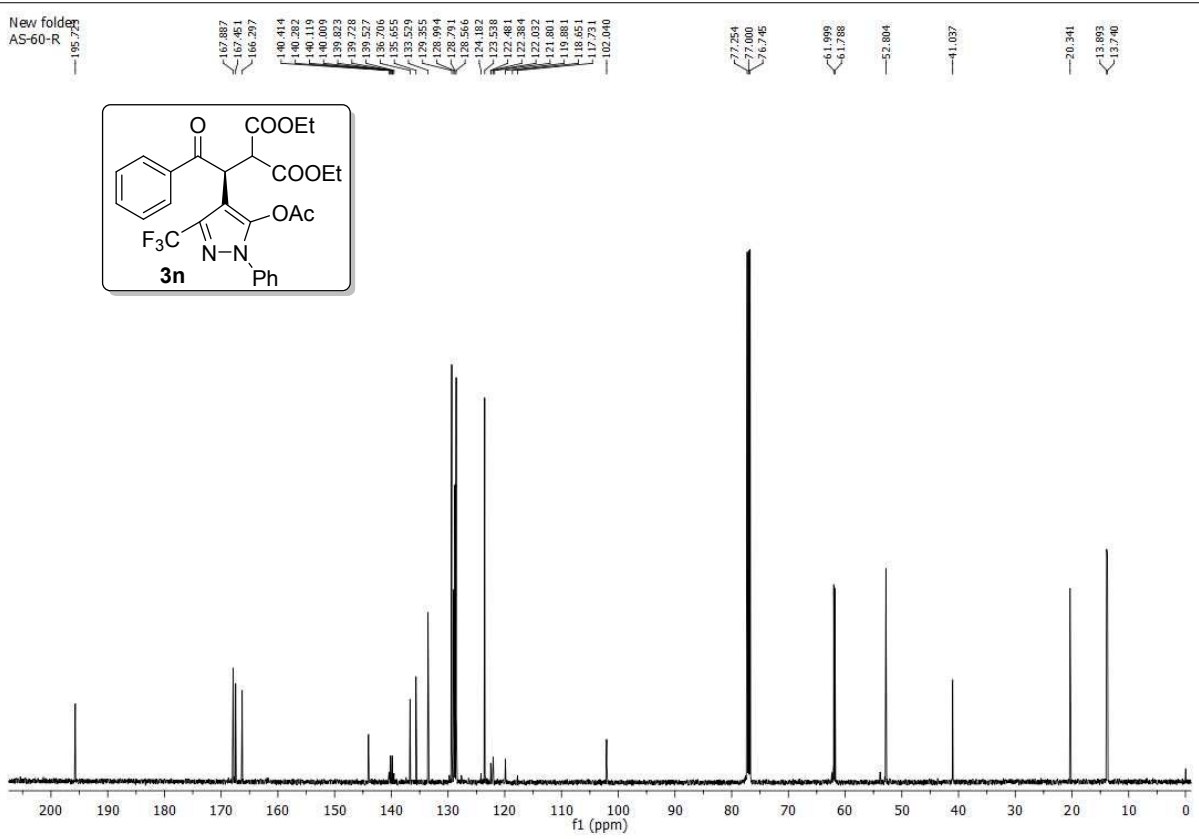

8 may 2018  
AS-76-C

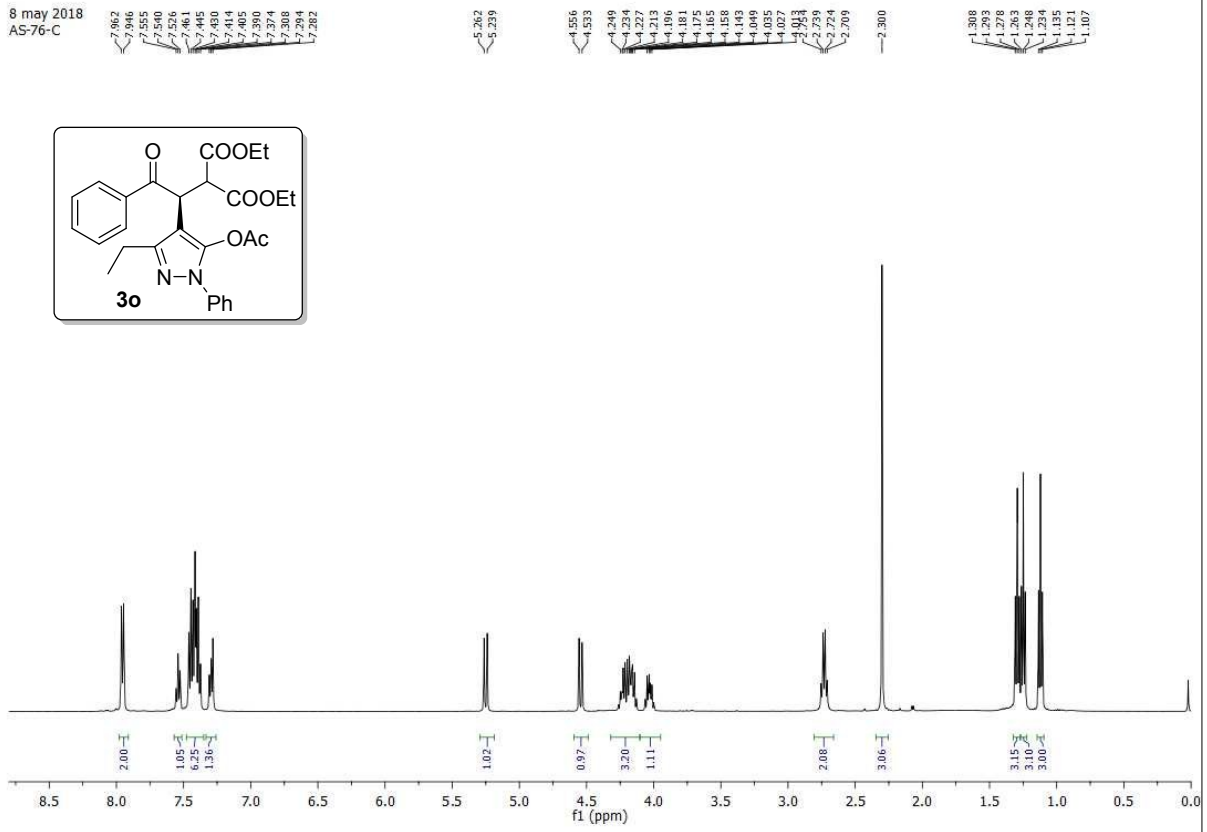

8 may 2018  
AS-76-C

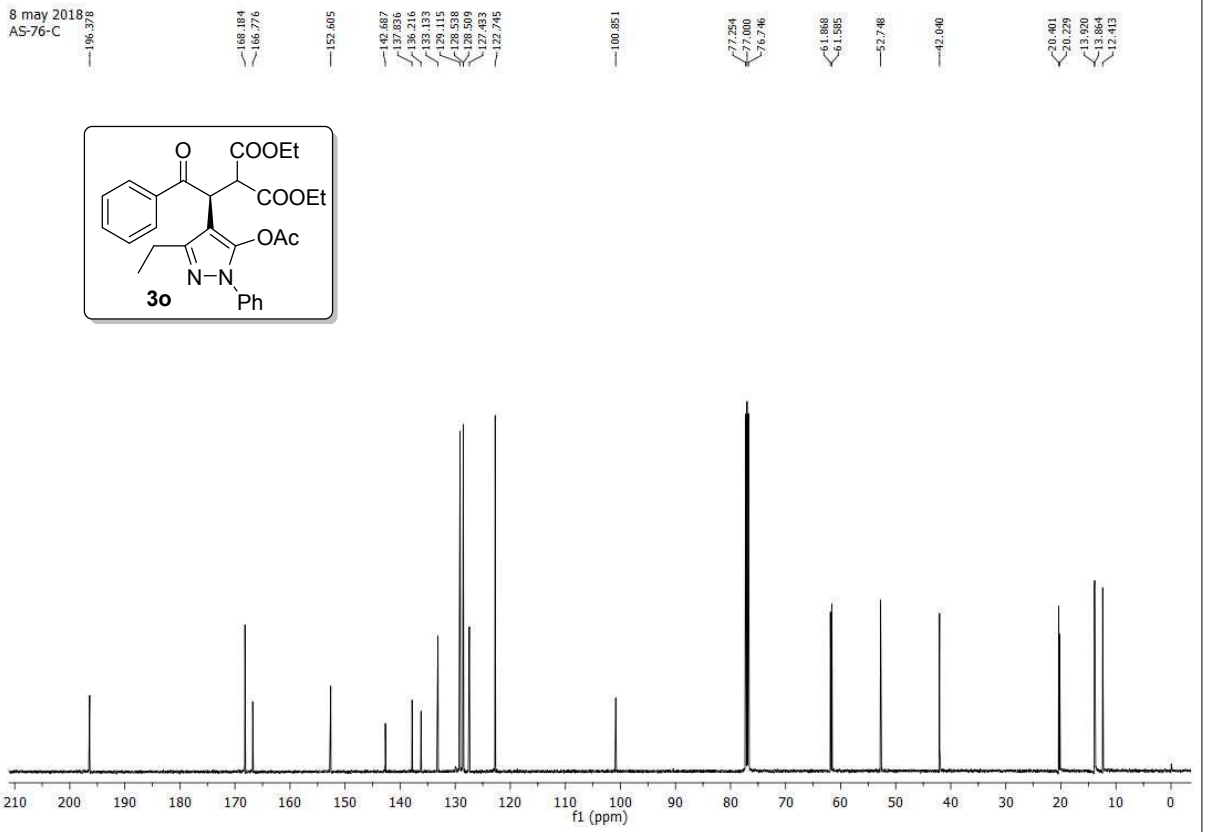

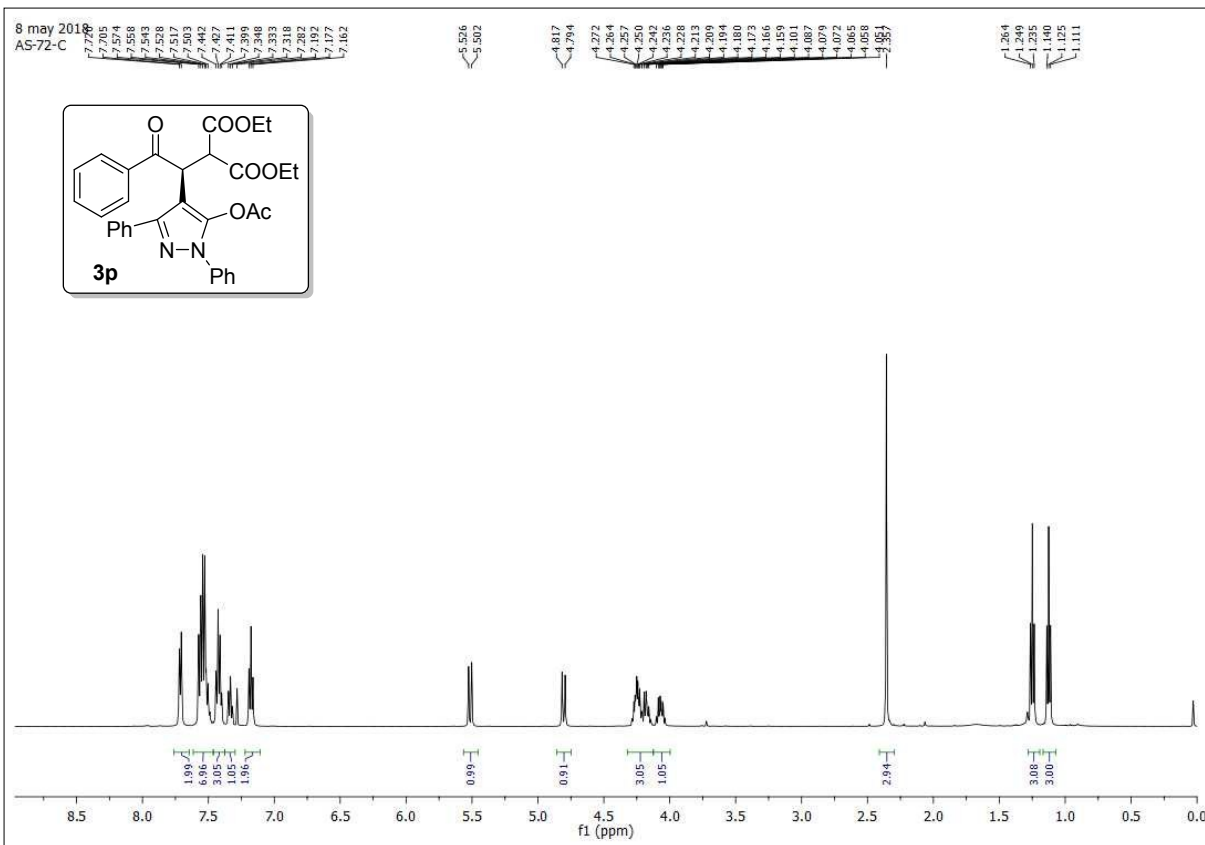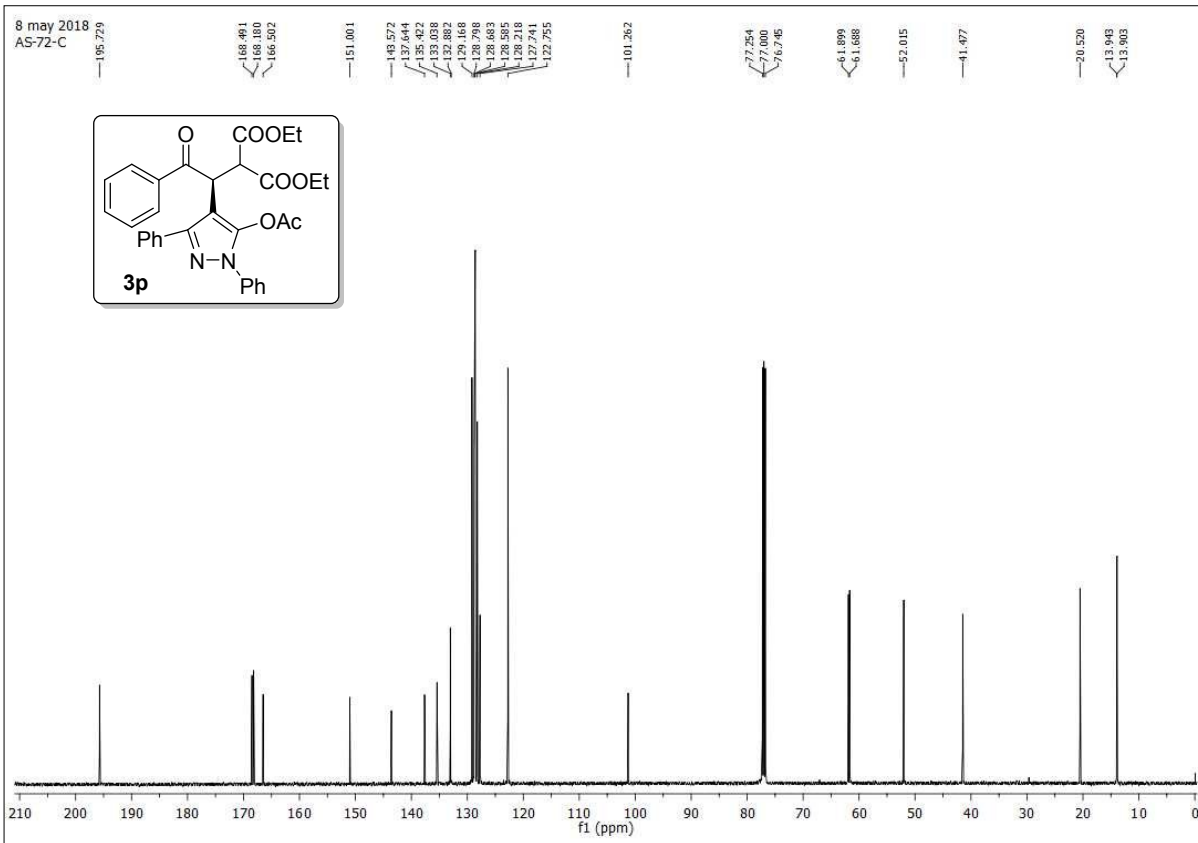

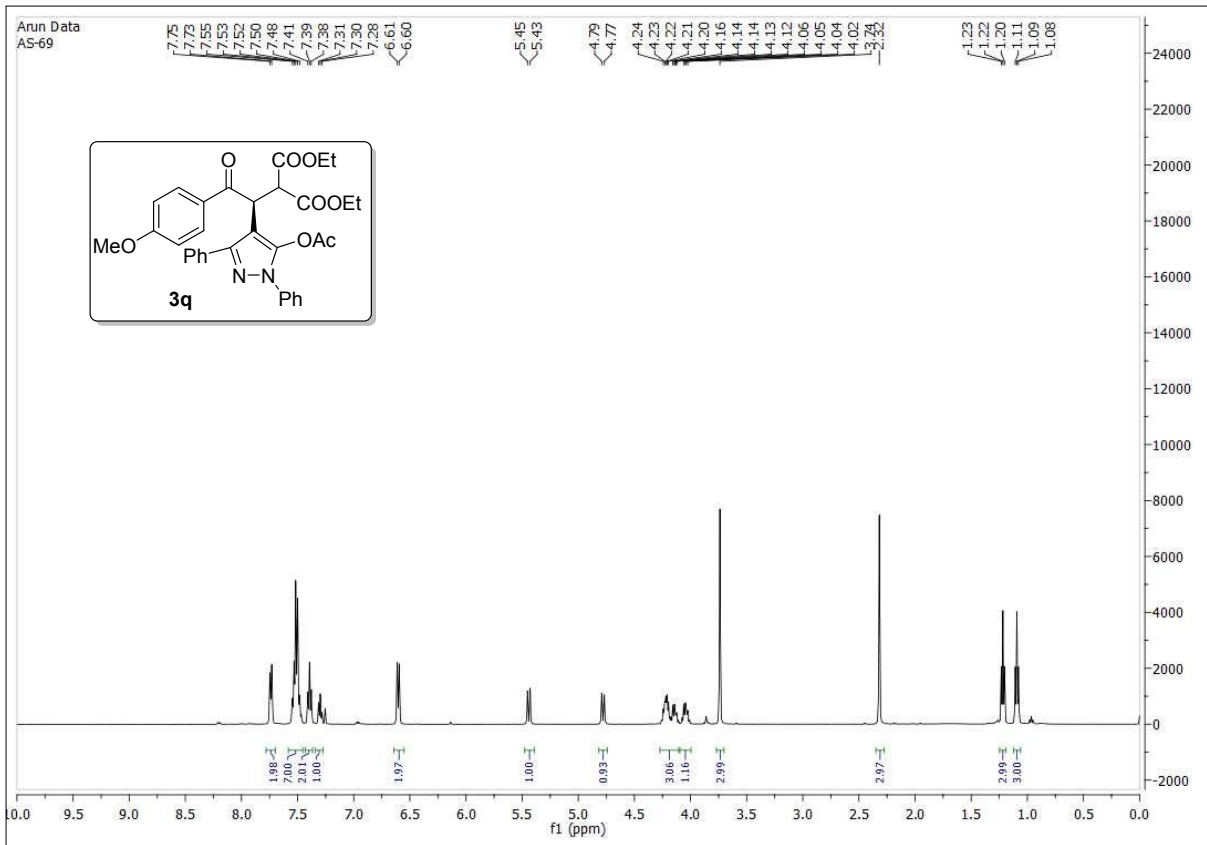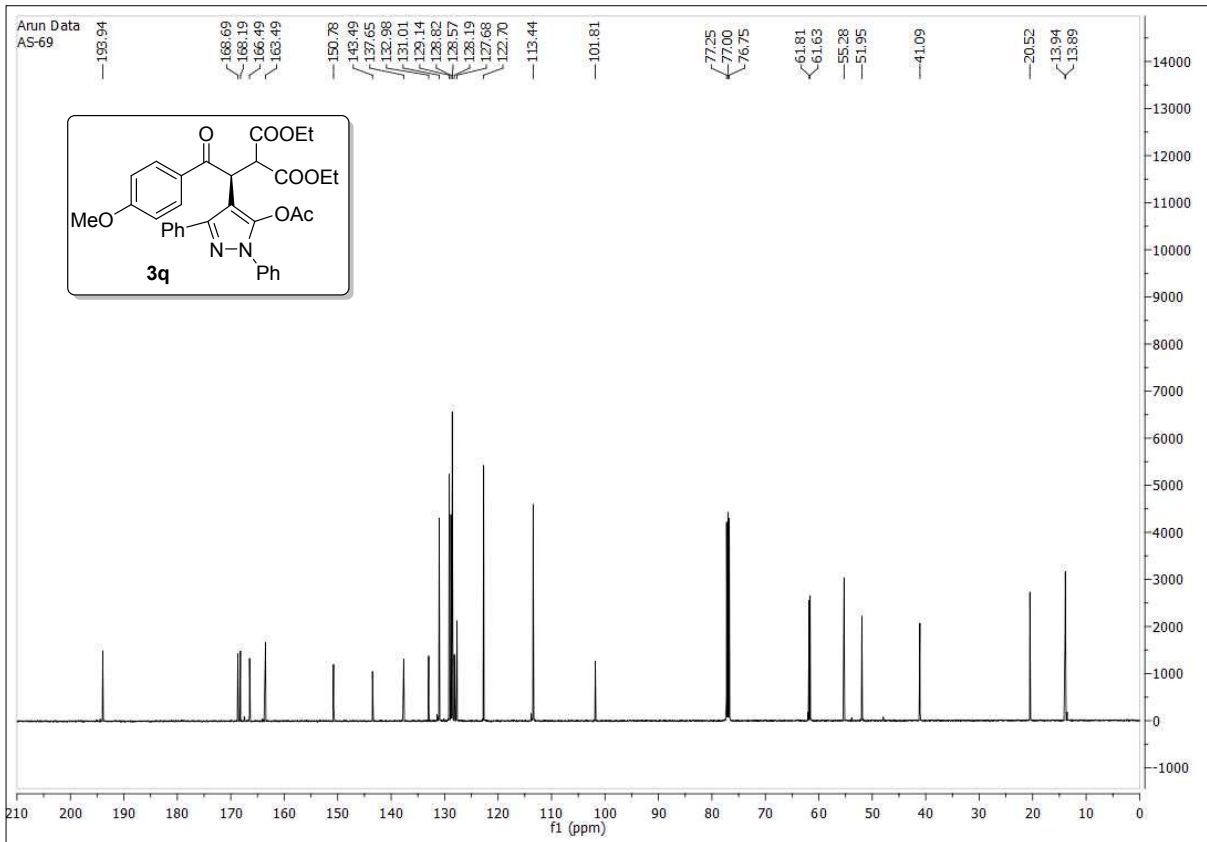

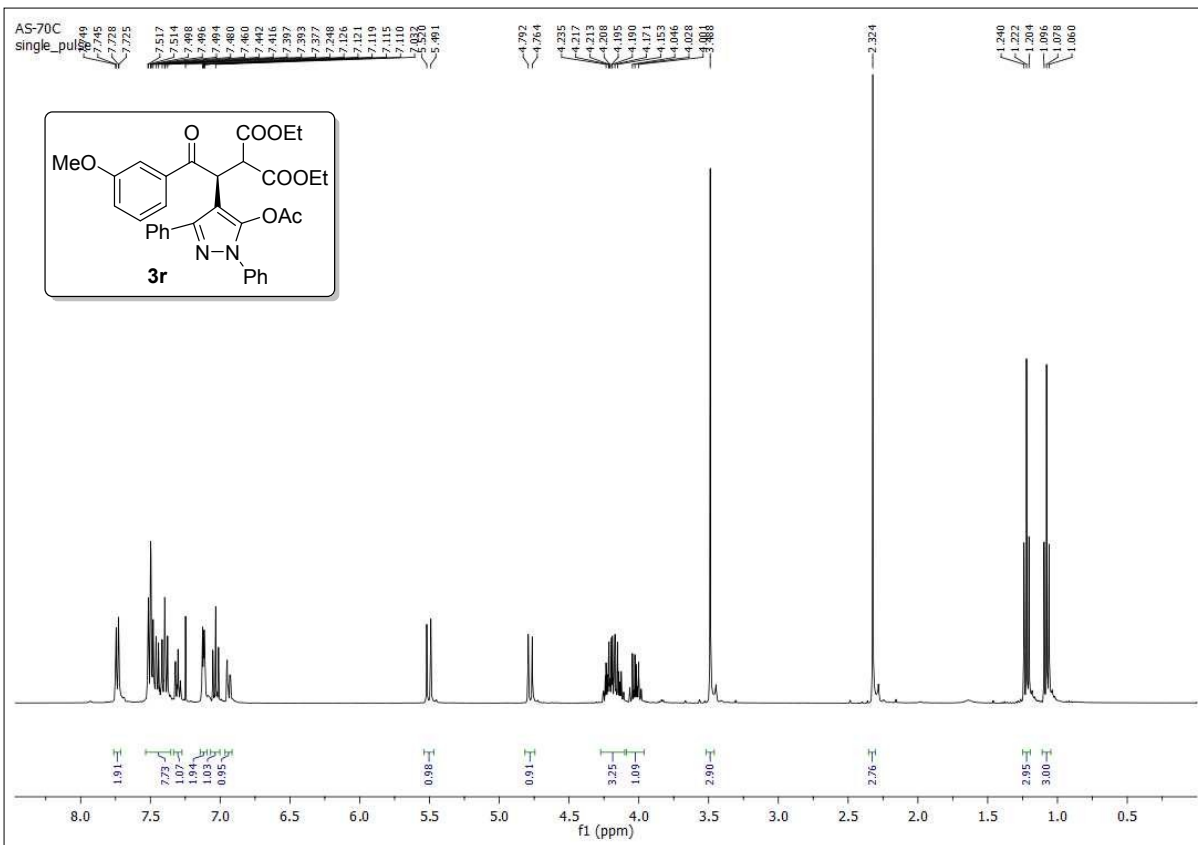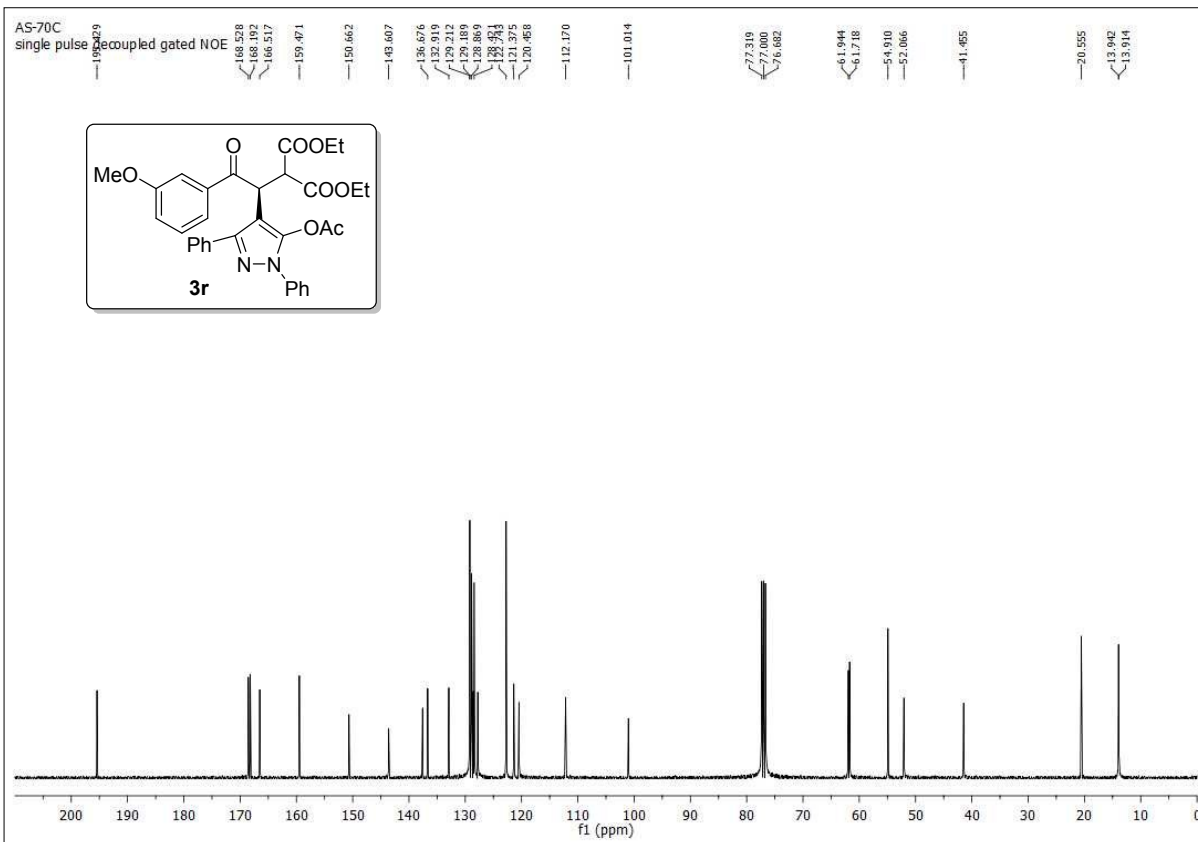

8 may 2018  
AS-74-C

7.945  
7.937  
7.495  
7.417  
7.400  
7.393  
7.376  
7.261  
6.920  
6.903

5.469  
5.446

4.568  
4.545

4.240  
4.226  
4.218  
4.204

2.297

1.279  
1.215  
1.201  
1.147  
1.133  
1.118

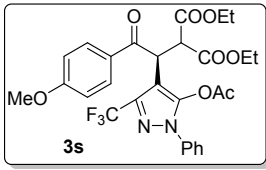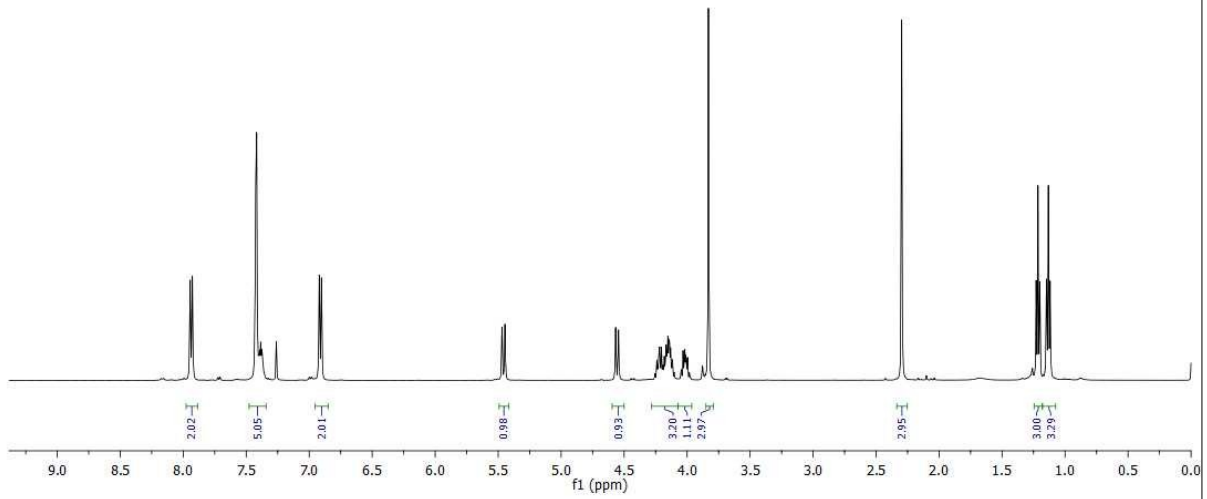

8 may 2018  
AS-74-C

193.890

167.926  
167.641  
166.348  
163.984

148.996  
146.314  
139.725  
139.429  
136.778

131.202  
129.365  
128.987  
128.462  
124.313  
123.575  
122.462  
121.615  
120.013  
114.320  
113.889  
112.854

77.301  
77.097  
76.793

61.929  
61.750

55.446  
52.880

40.691

20.368  
13.914  
13.766

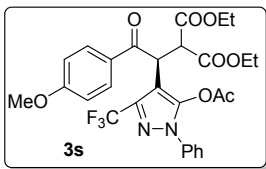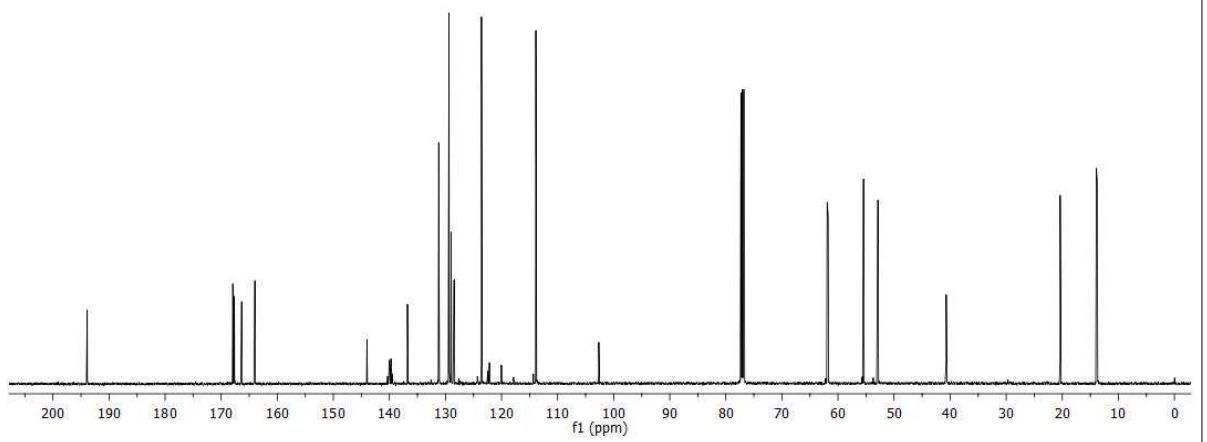

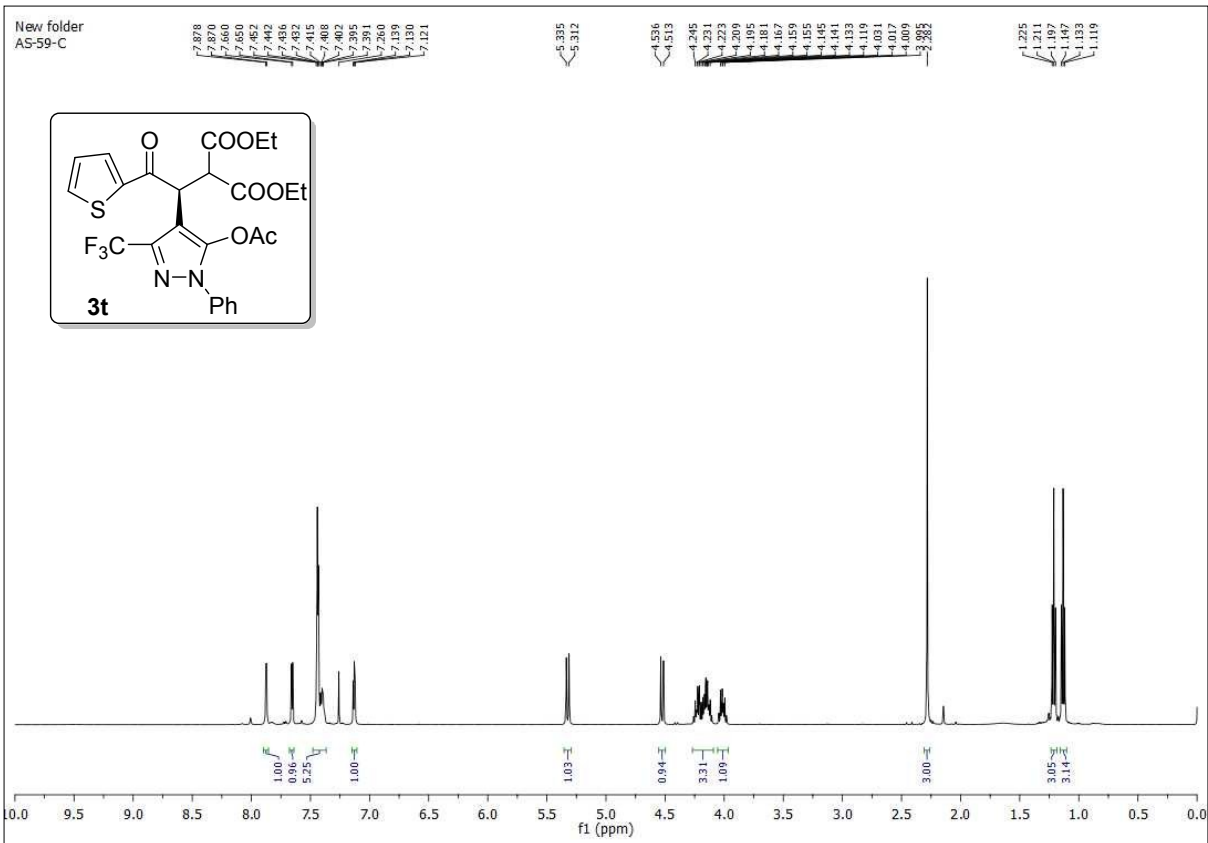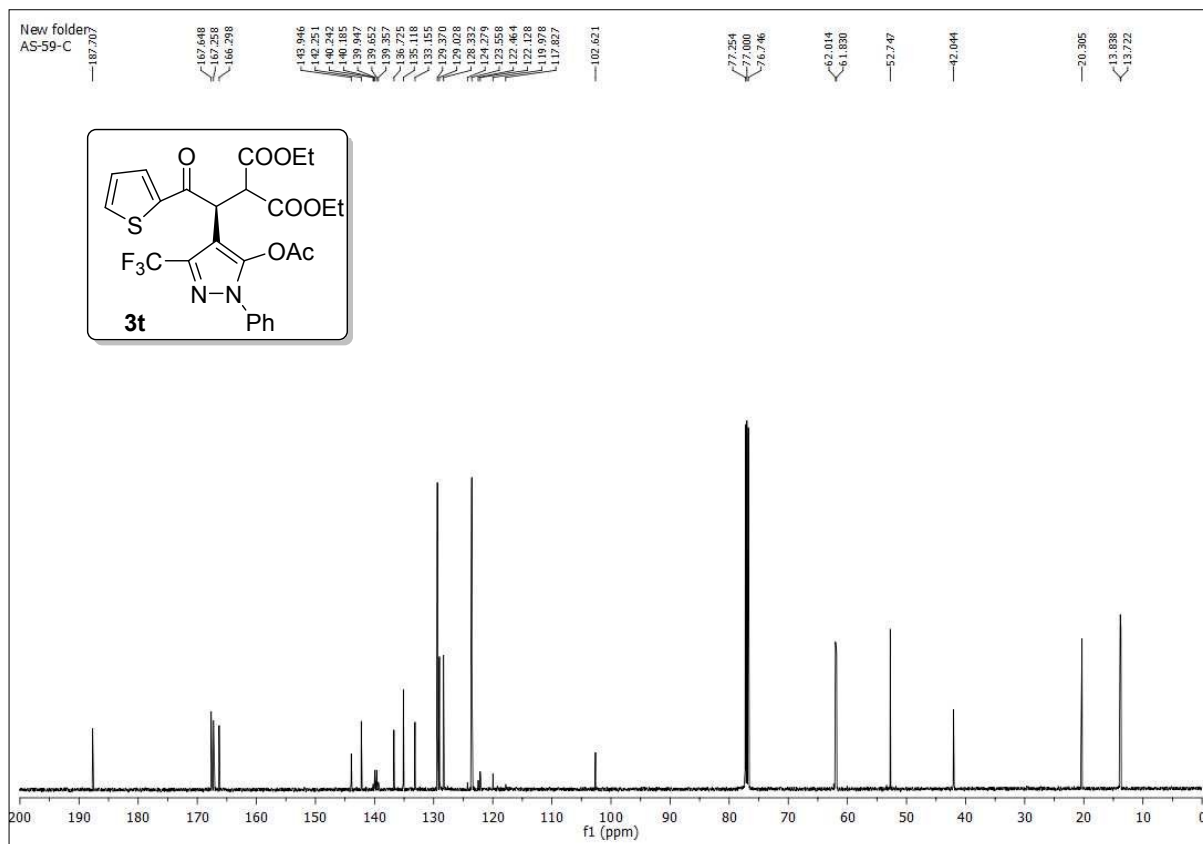



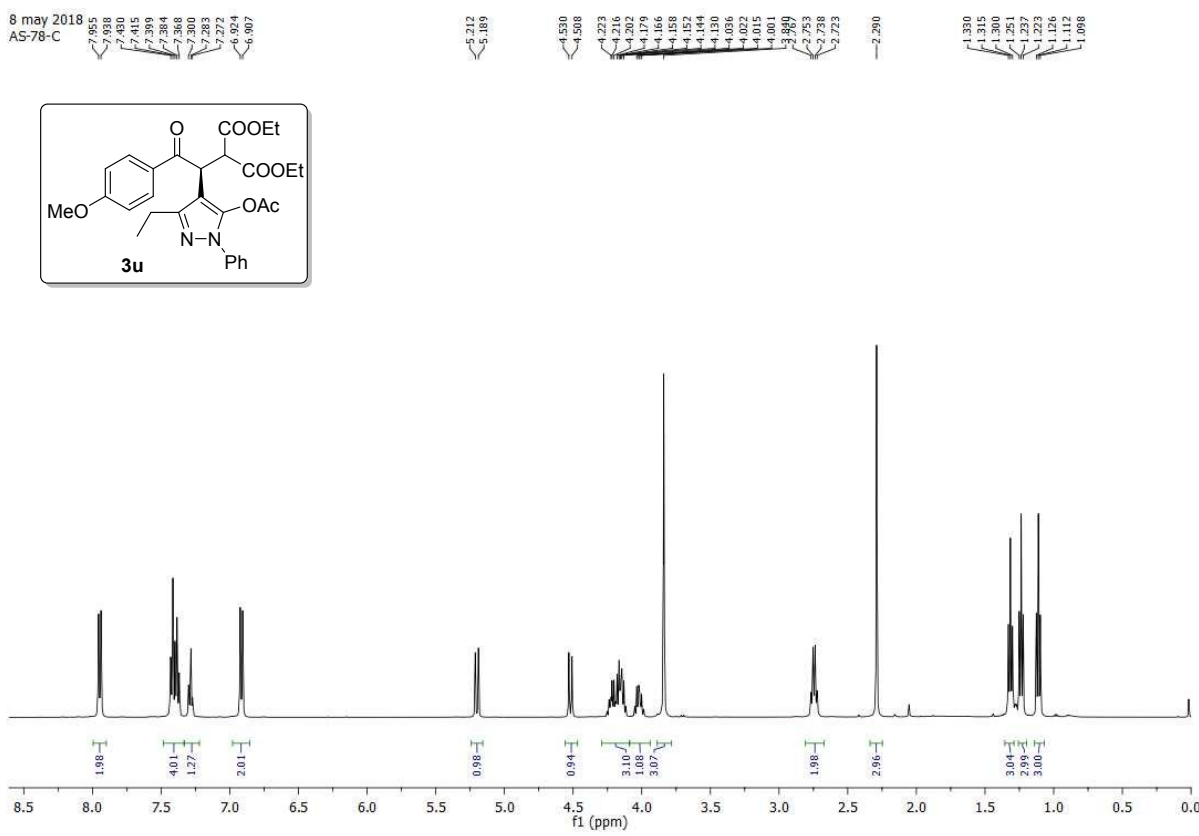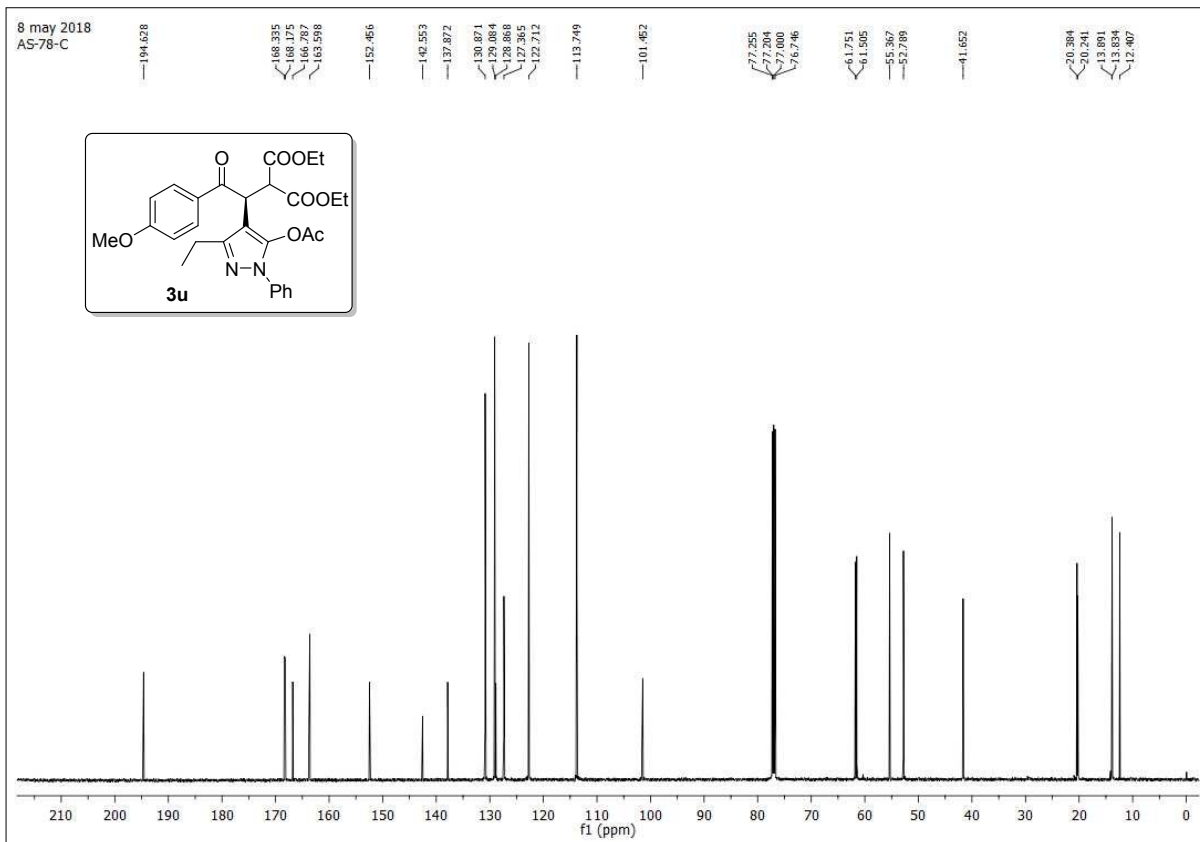

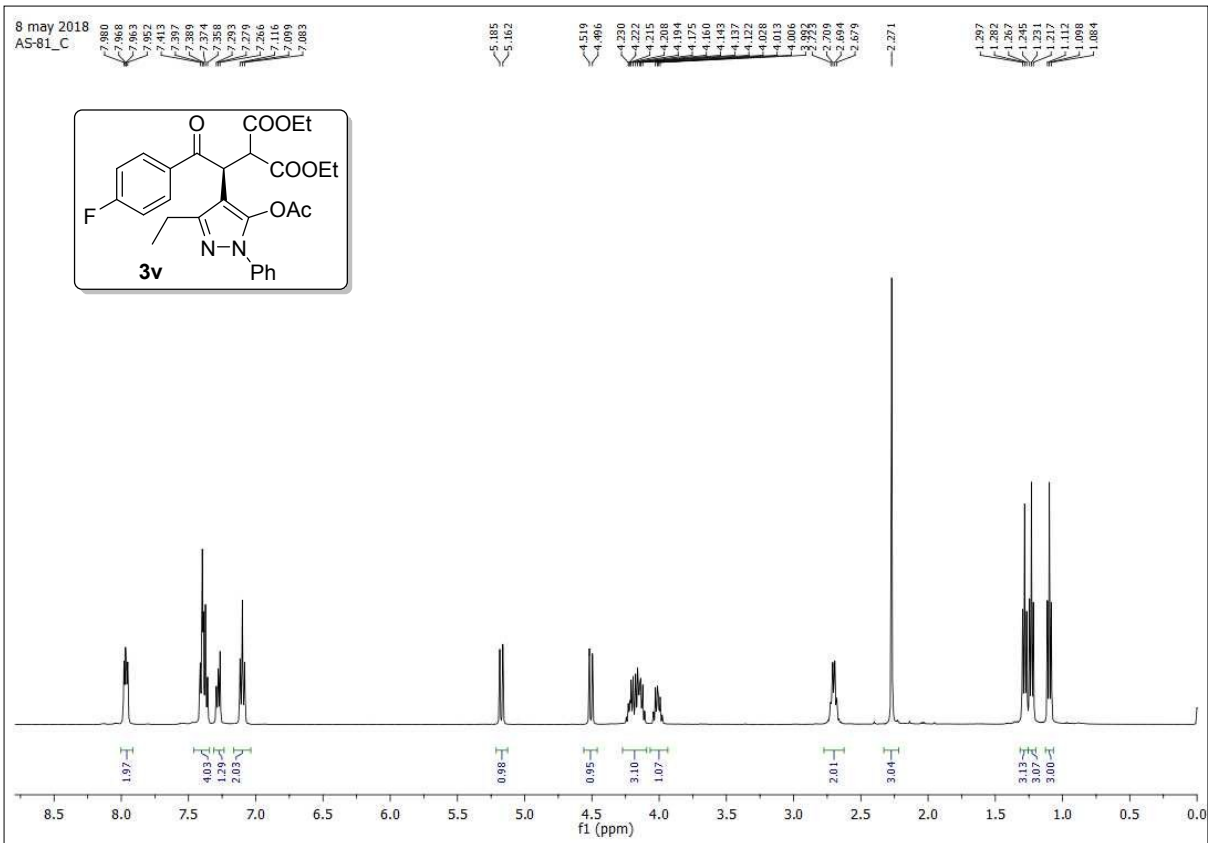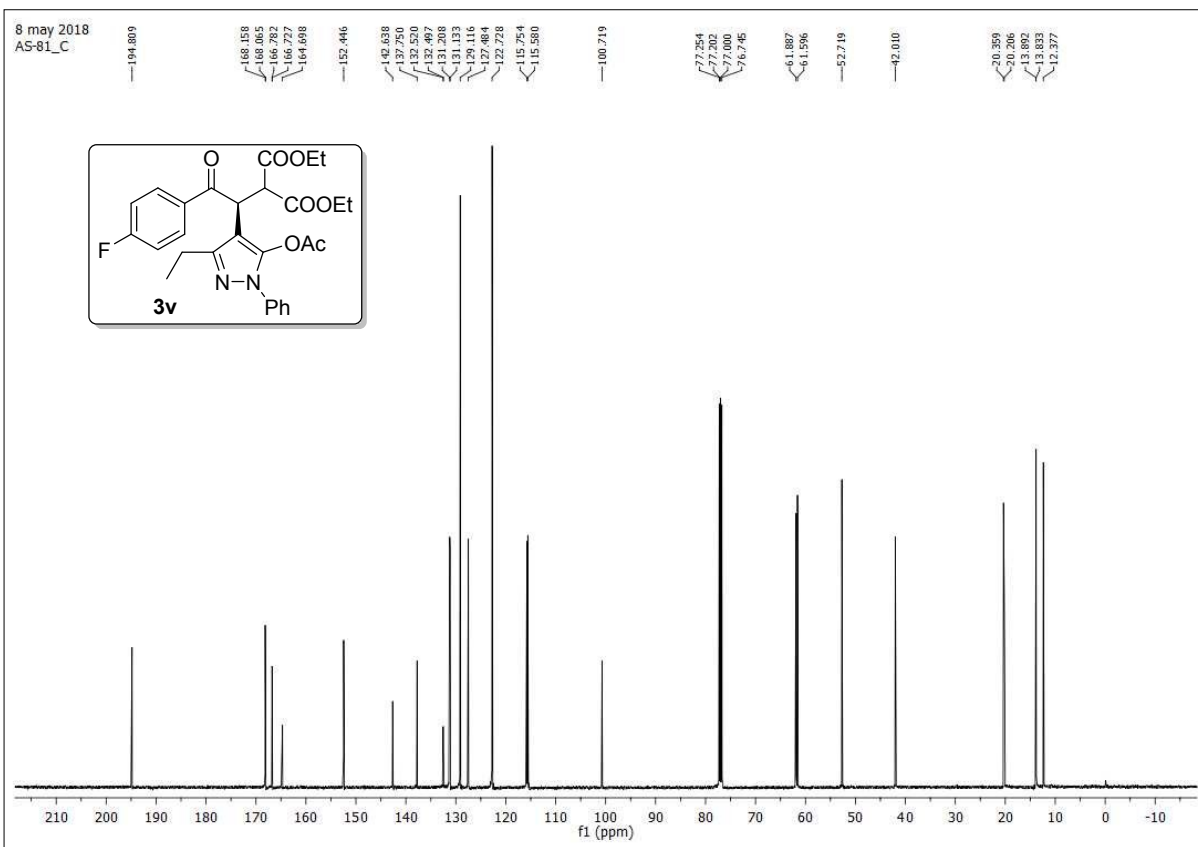

8 may 2018  
AS-77-C

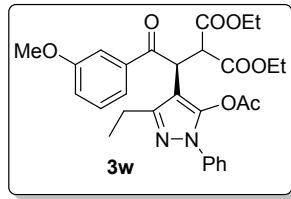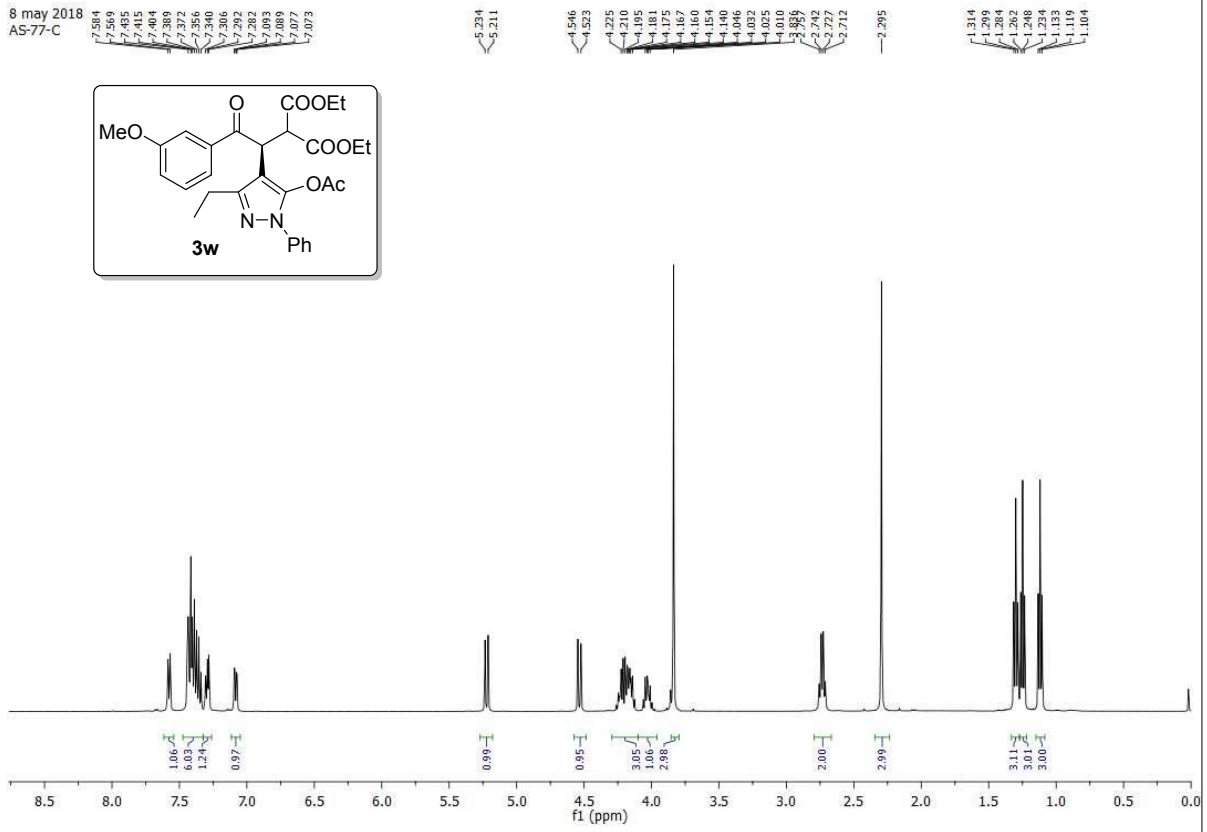

8 may 2018  
AS-77-C

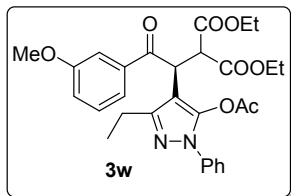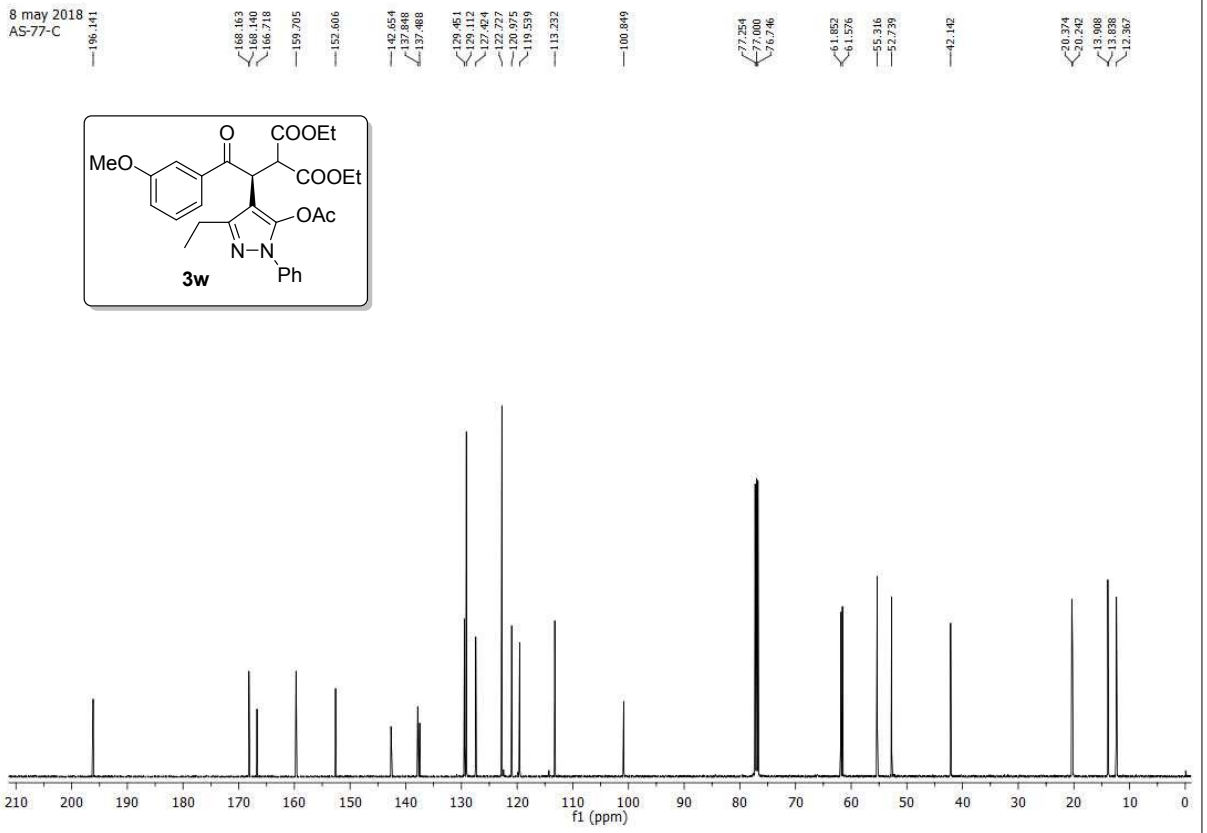

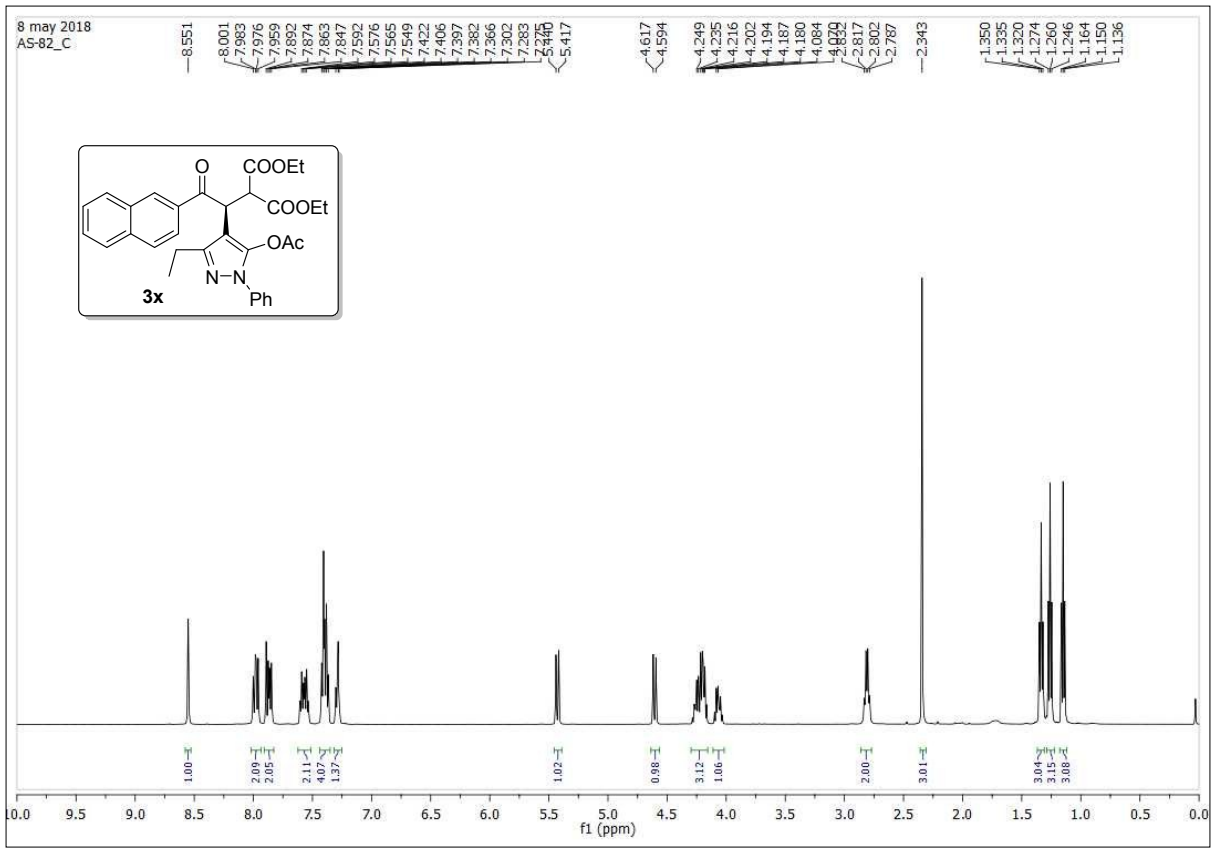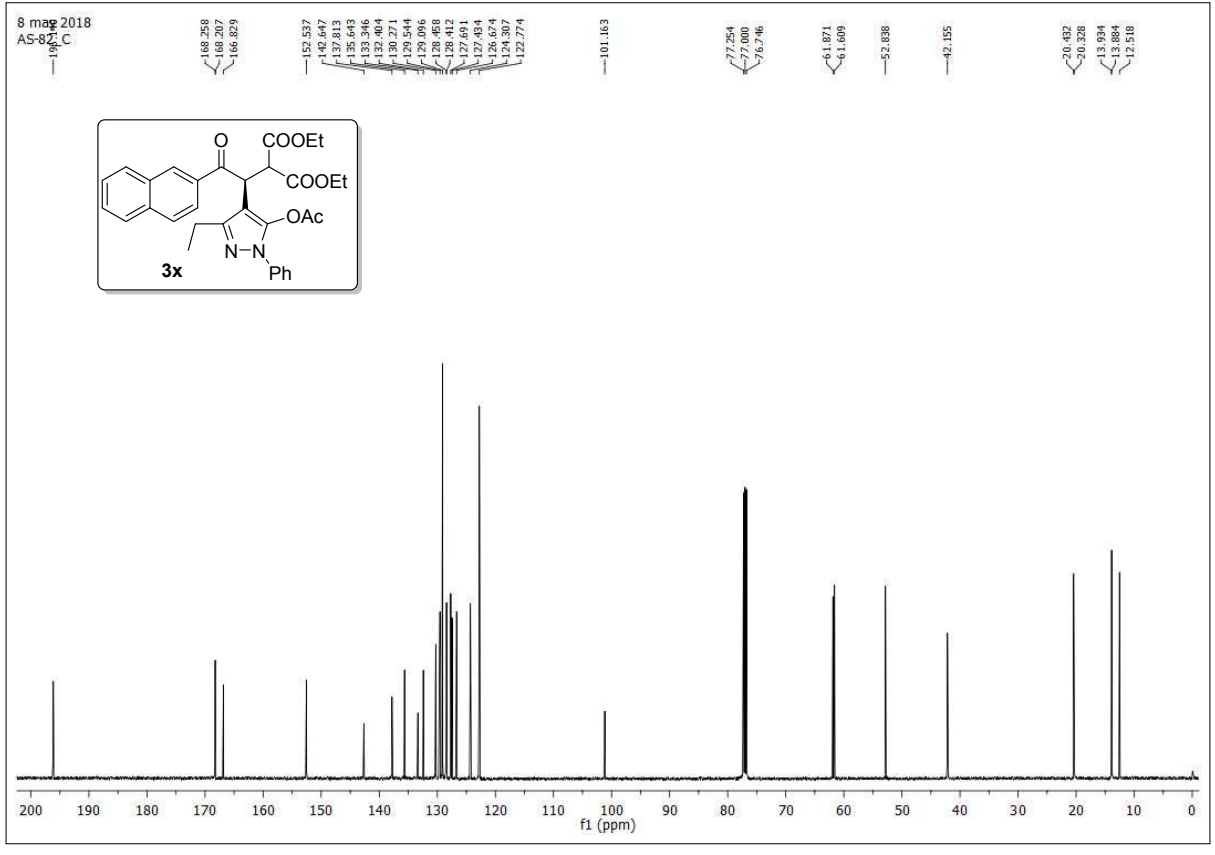

8 may 2018  
AS-79-C

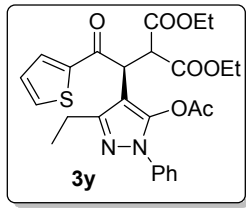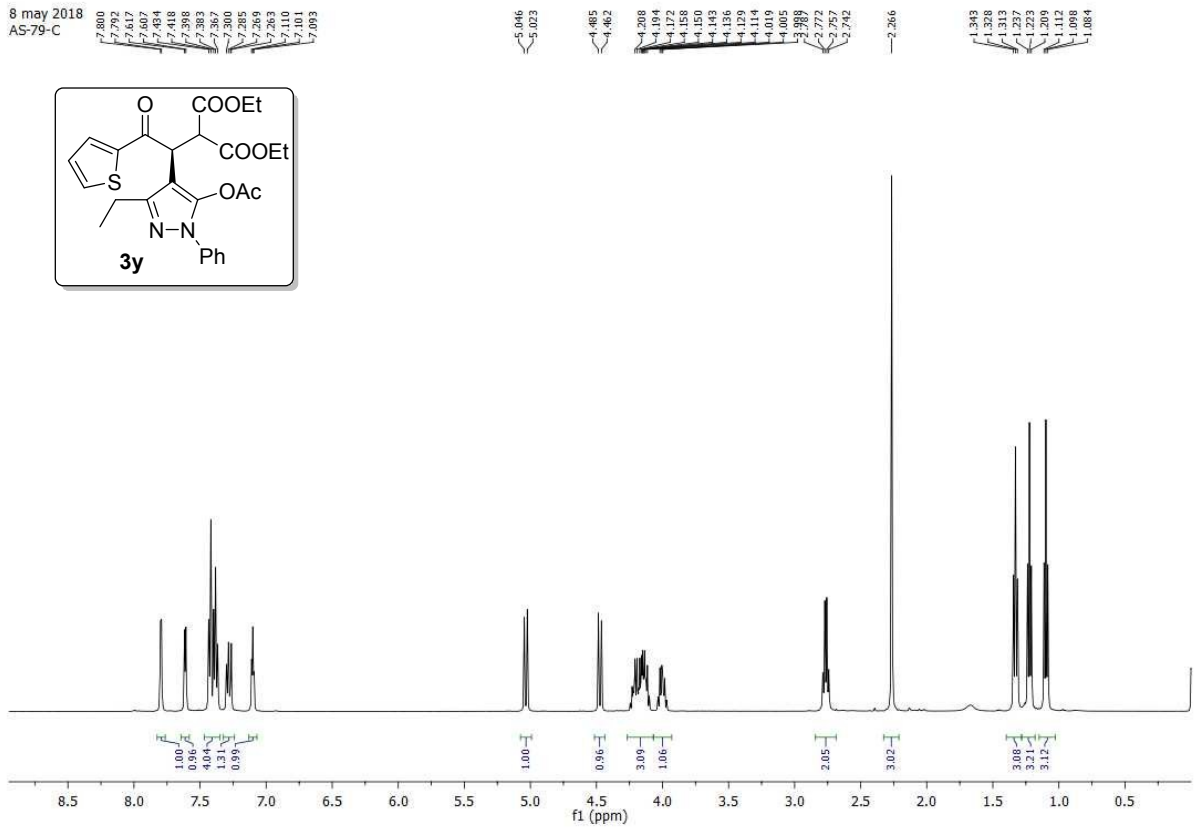

8 may 2018  
AS-79-C

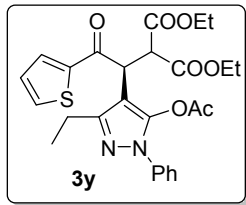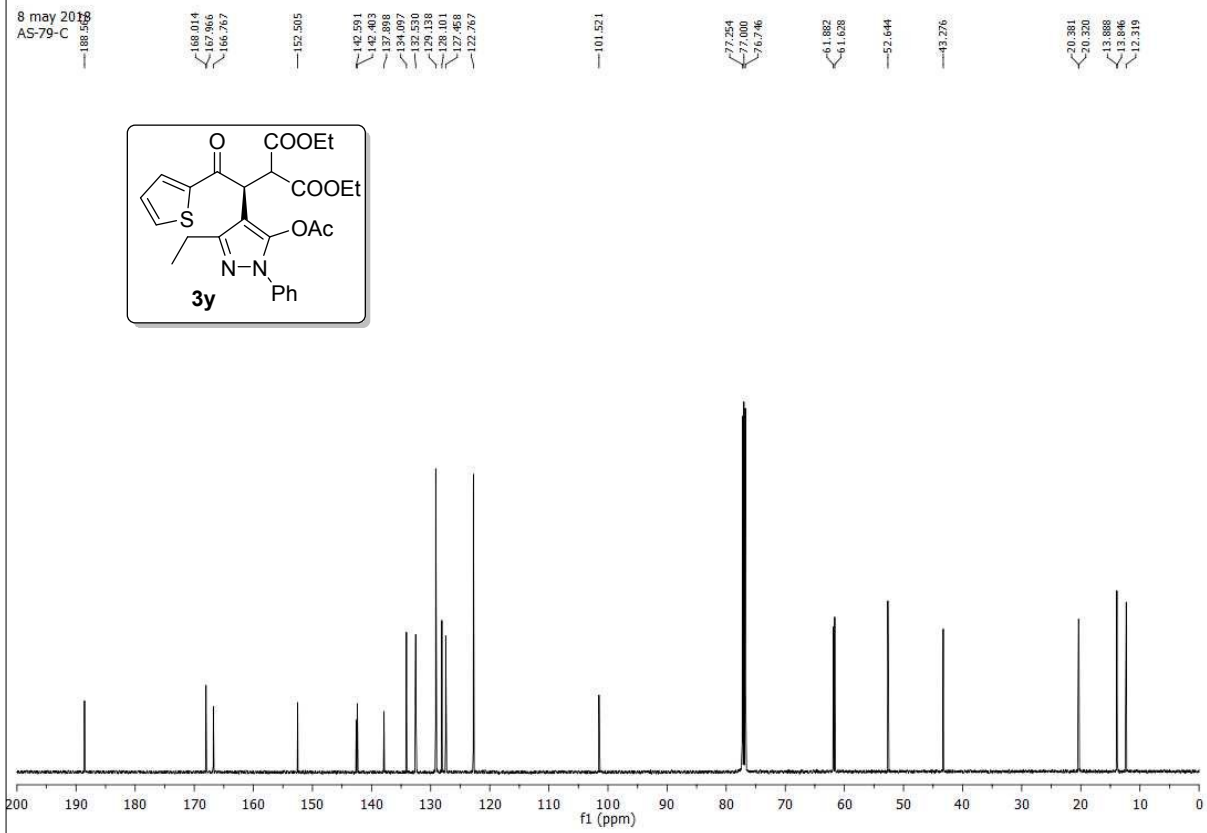

AS-P-5  
single\_pulse

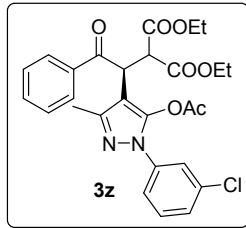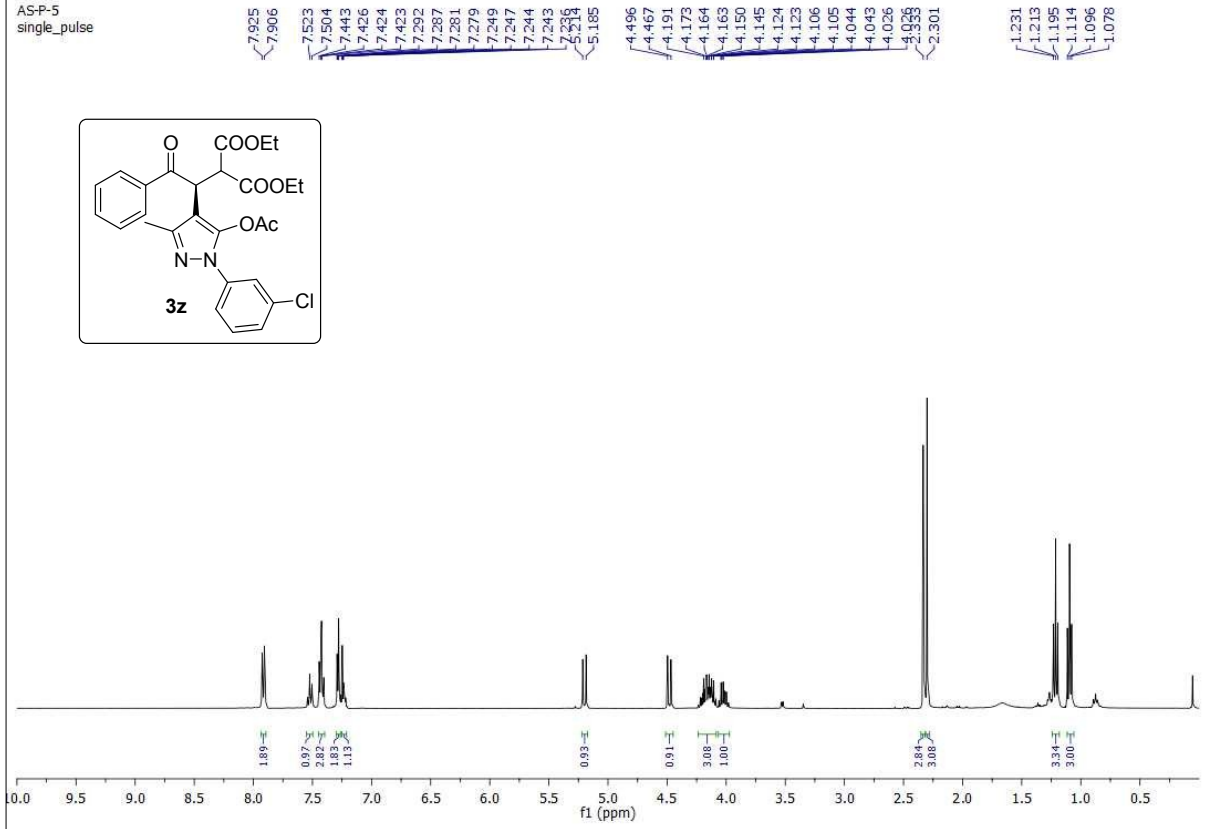

AS-P-5  
single\_pulse

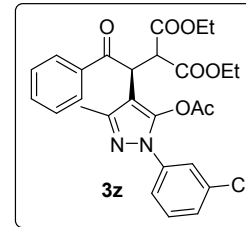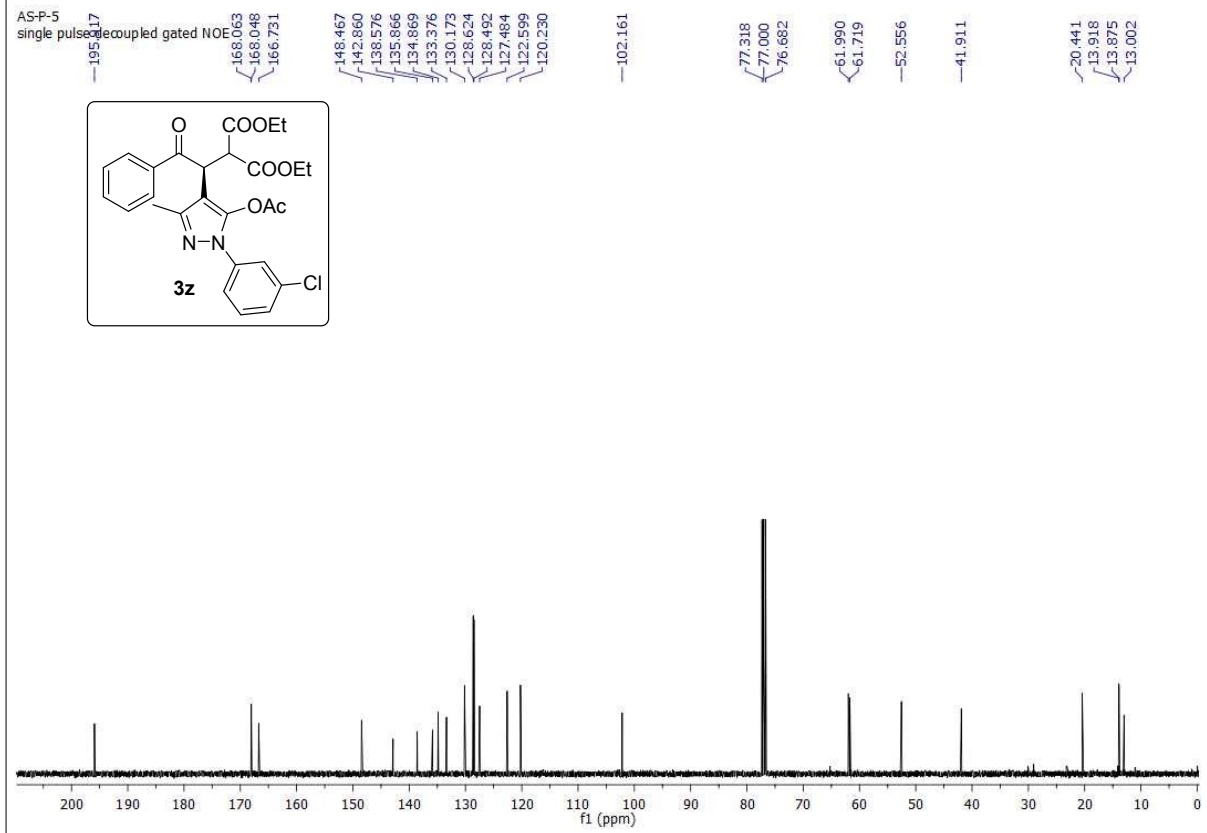

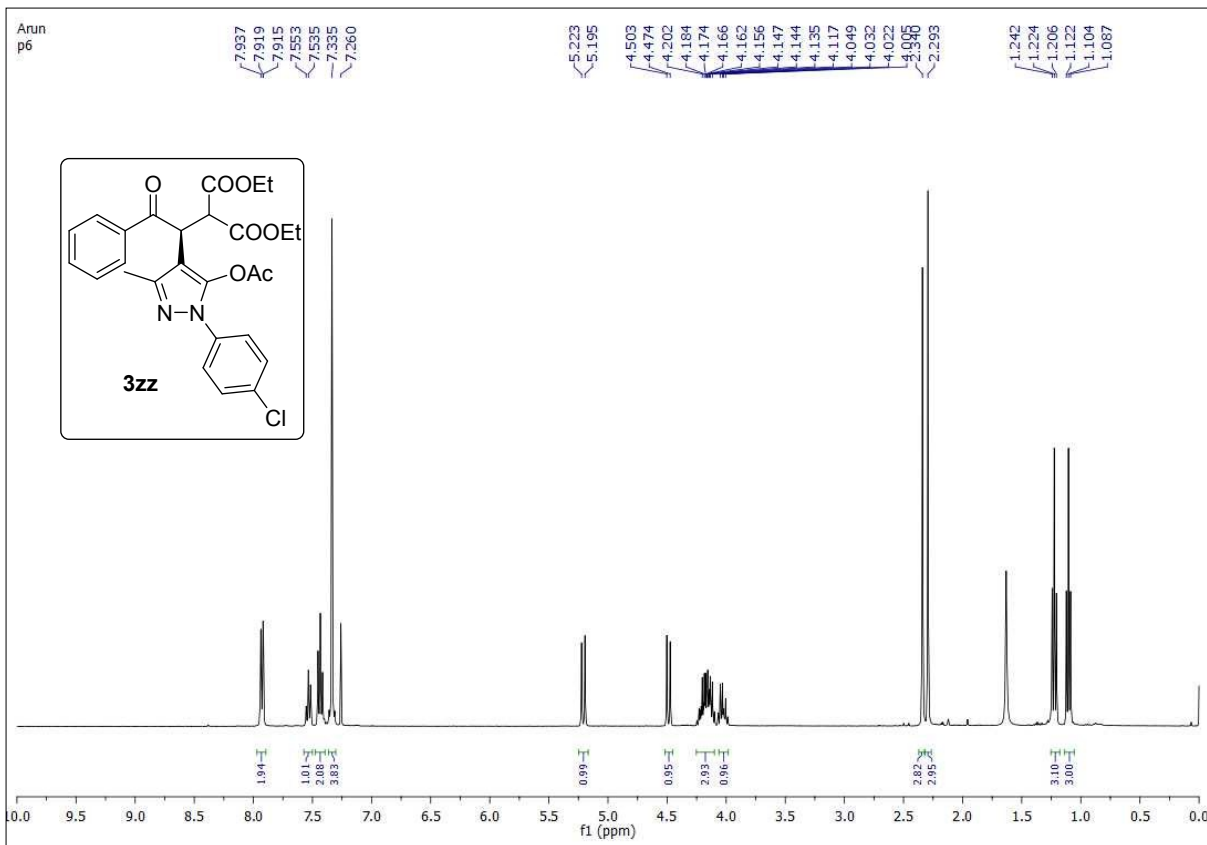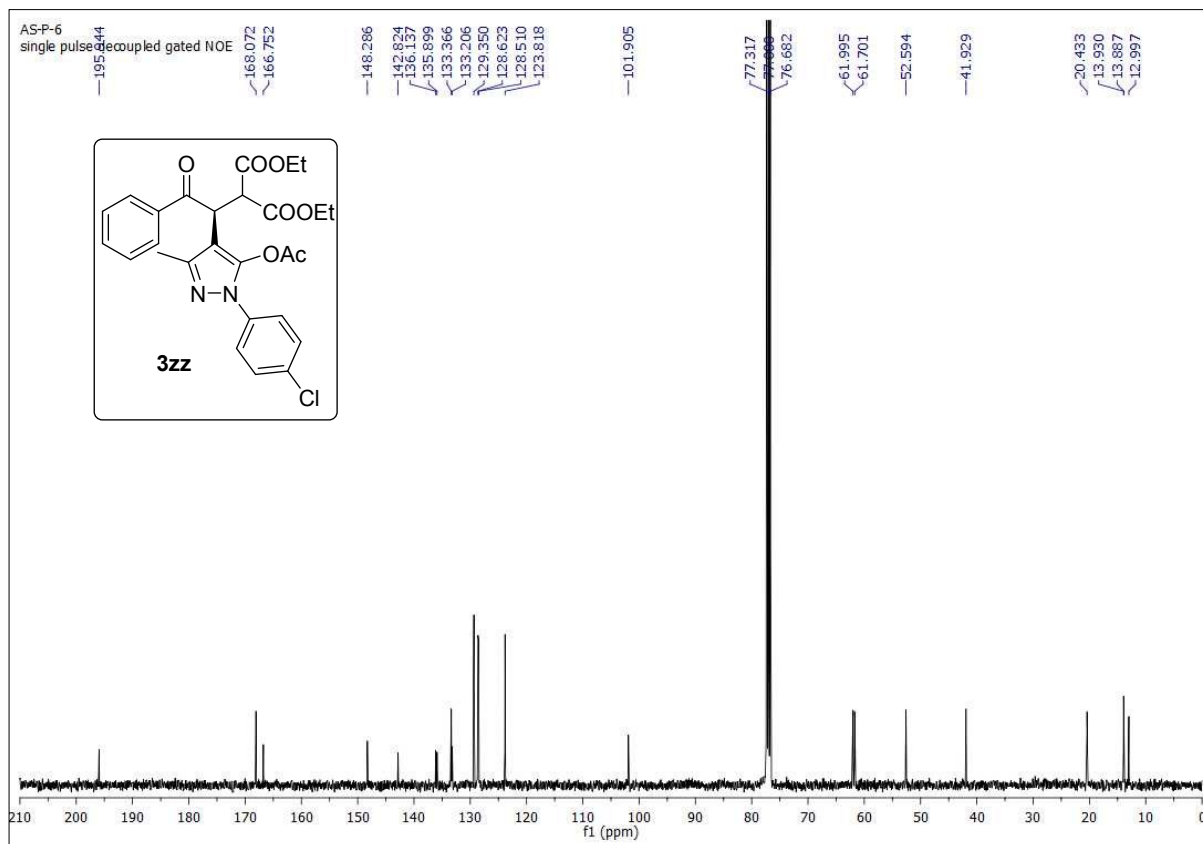

Nov06-2018  
AS-benzyl-OAc

8.166, 8.151, 8.036, 8.012, 7.997, 7.563, 7.548, 7.532, 7.516, 7.473, 7.458, 7.442, 7.422, 7.407, 7.326, 7.311, 7.295, 7.285, 5.612, 5.590, 5.522, 5.500, 5.485, 5.463, 4.177, 4.171, 4.162, 4.157, 4.148, 4.142, 4.135, 4.126, 4.120, 4.111, 4.104, 4.090, 4.022, 4.008, 4.000, 3.994, 3.986, 2.884, 2.832, 2.823, 2.291, 1.175, 1.161, 1.146, 1.072, 1.058, 1.044

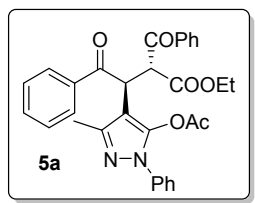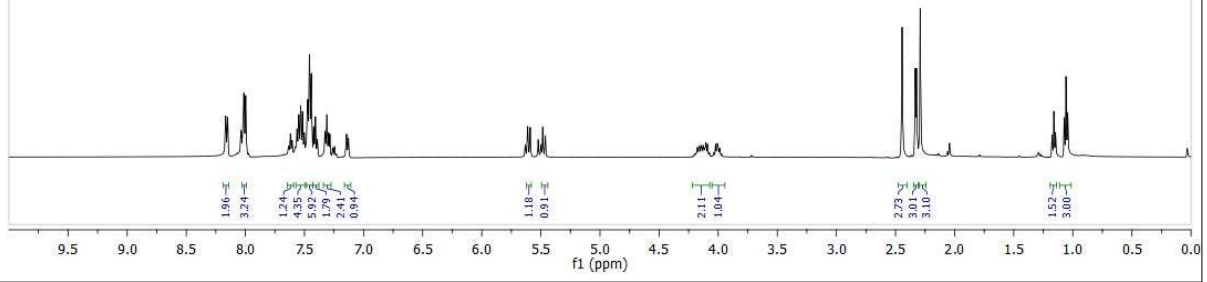

Jan17-2019  
as-benzyl

196.321, 193.189, 168.153, 166.875, 147.910, 142.855, 137.629, 135.950, 135.706, 133.779, 133.269, 129.152, 128.831, 128.697, 128.615, 128.552, 127.537, 122.737, 102.031, 77.255, 76.746, 55.492, 42.694, 20.403, 13.077

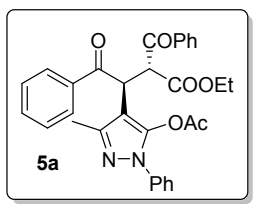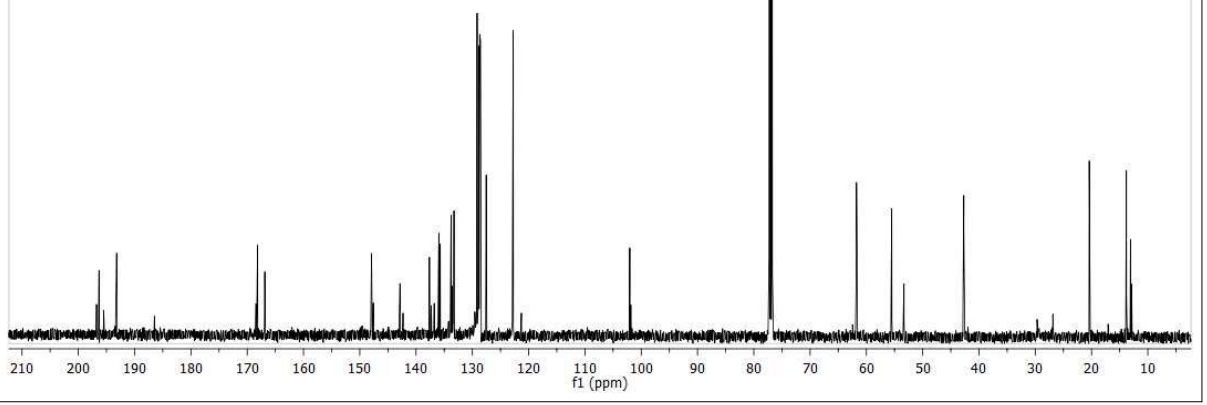



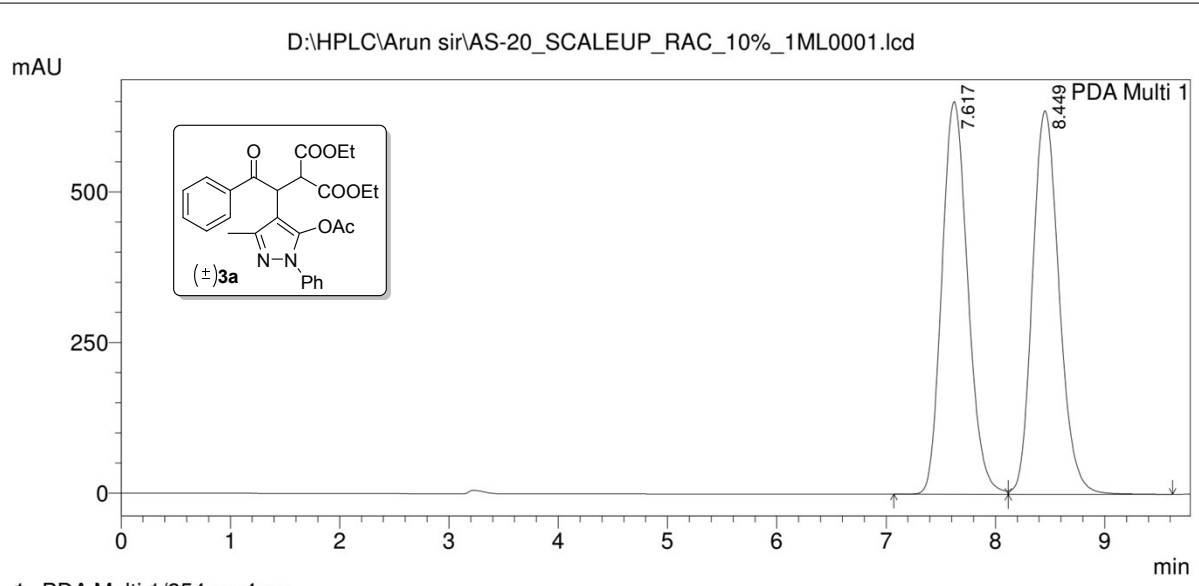

PeakTable

PDA Ch1 254nm 4nm

| Peak# | Ret. Time | Area     | Height  | Area %  | Height % |
|-------|-----------|----------|---------|---------|----------|
| 1     | 7.617     | 10745502 | 652042  | 49.913  | 50.590   |
| 2     | 8.449     | 10782761 | 636824  | 50.087  | 49.410   |
| Total |           | 21528263 | 1288866 | 100.000 | 100.000  |

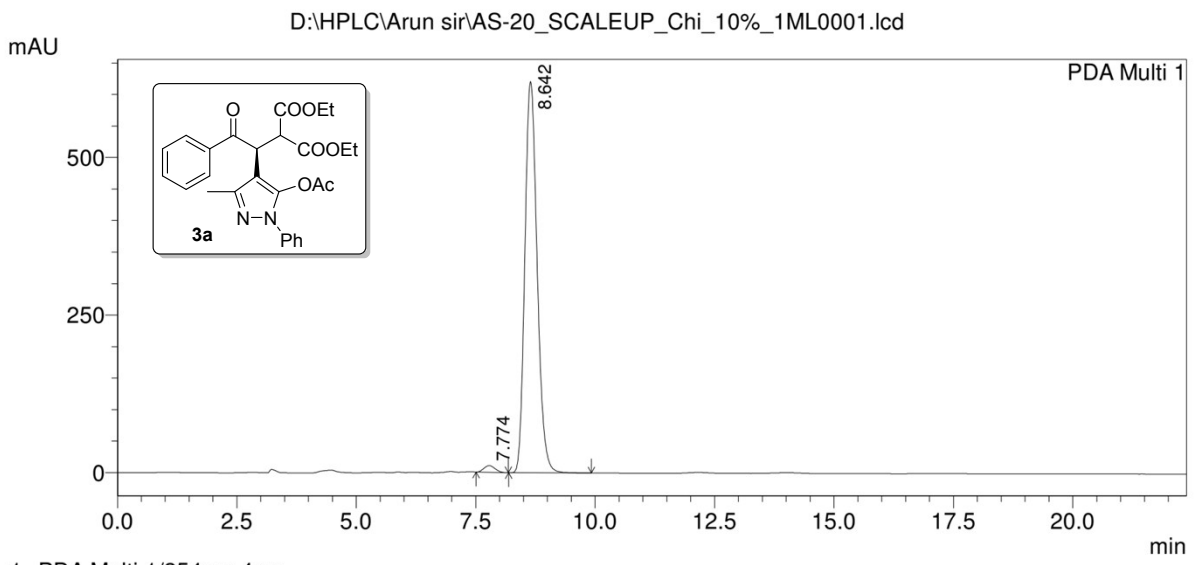

PeakTable

PDA Ch1 254nm 4nm

| Peak# | Ret. Time | Area     | Height | Area %  | Height % |
|-------|-----------|----------|--------|---------|----------|
| 1     | 7.774     | 173838   | 10747  | 1.546   | 1.700    |
| 2     | 8.642     | 11072685 | 621350 | 98.454  | 98.300   |
| Total |           | 11246522 | 632097 | 100.000 | 100.000  |

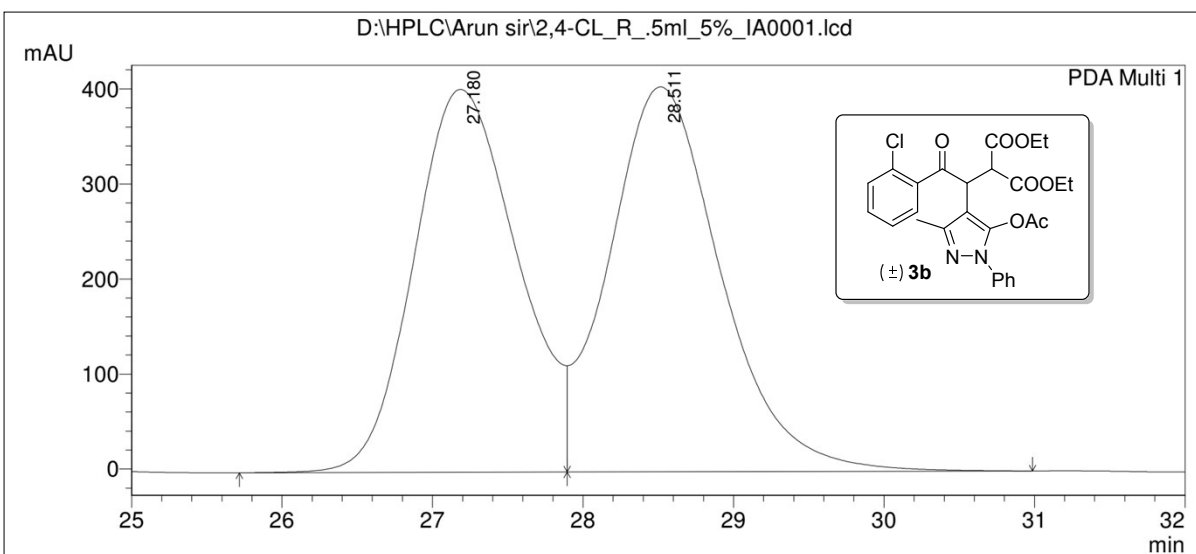

1 PDA Multi 1/254nm 4nm

PeakTable

PDA Ch1 254nm 4nm

| Peak# | Ret. Time | Area     | Height | Area %  | Height % |
|-------|-----------|----------|--------|---------|----------|
| 1     | 27.180    | 19298326 | 402852 | 48.002  | 49.868   |
| 2     | 28.511    | 20904551 | 404982 | 51.998  | 50.132   |
| Total |           | 40202877 | 807834 | 100.000 | 100.000  |

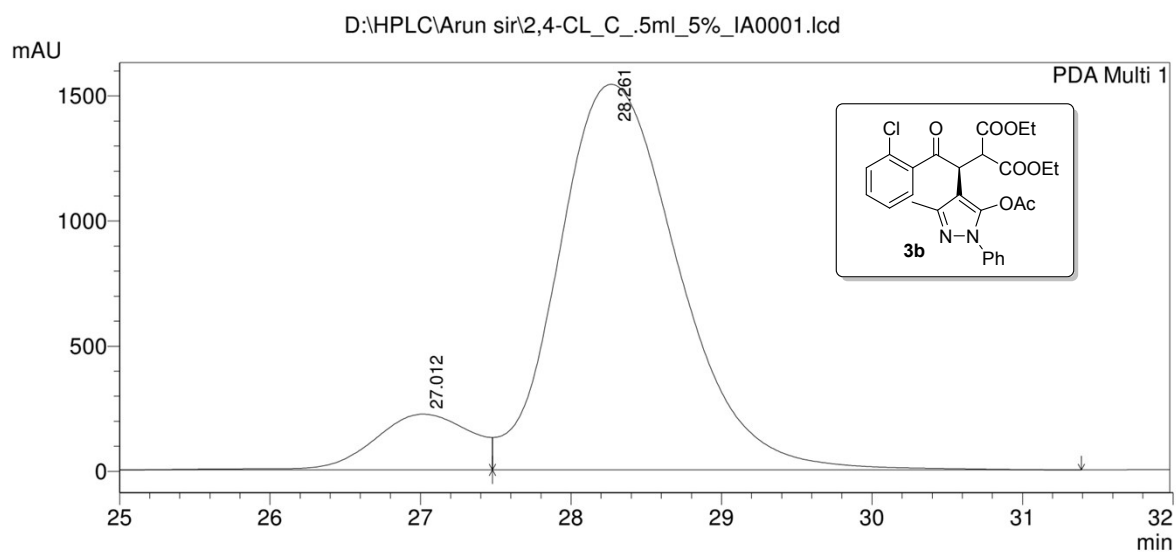

1 PDA Multi 1/254nm 4nm

PeakTable

PDA Ch1 254nm 4nm

| Peak# | Ret. Time | Area     | Height  | Area %  | Height % |
|-------|-----------|----------|---------|---------|----------|
| 1     | 27.012    | 10096634 | 223074  | 10.596  | 12.642   |
| 2     | 28.261    | 85189300 | 1541493 | 89.404  | 87.358   |
| Total |           | 95285935 | 1764567 | 100.000 | 100.000  |

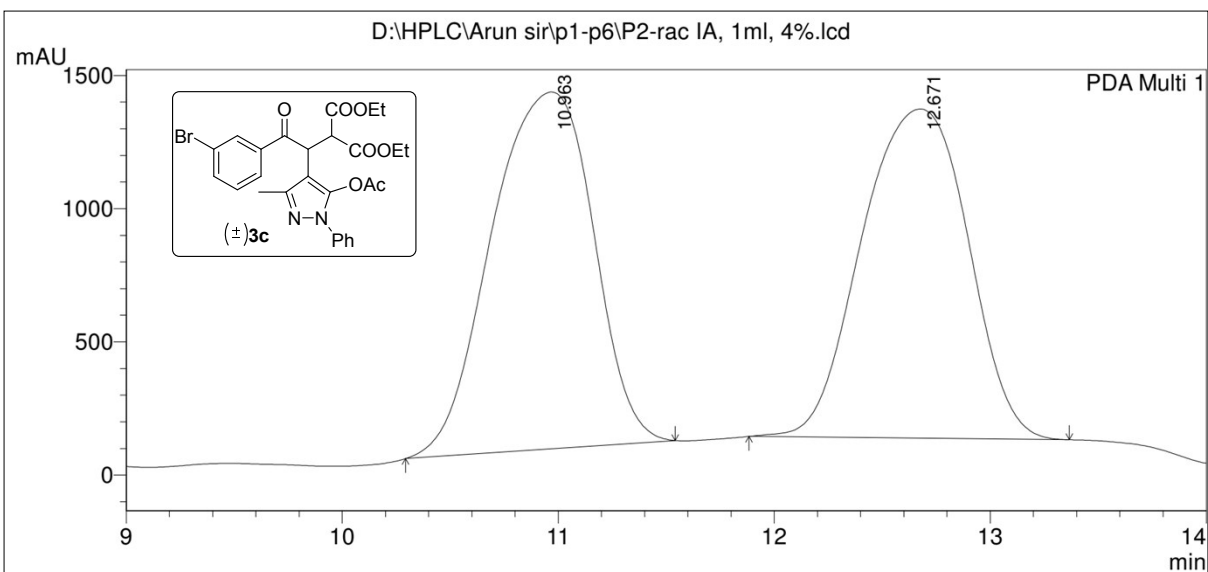

PeakTable

| Peak# | Ret. Time | Area     | Height  | Area %  | Height % |
|-------|-----------|----------|---------|---------|----------|
| 1     | 10.963    | 44124116 | 1339786 | 51.021  | 52.018   |
| 2     | 12.671    | 42357940 | 1235825 | 48.979  | 47.982   |
| Total |           | 86482057 | 2575611 | 100.000 | 100.000  |

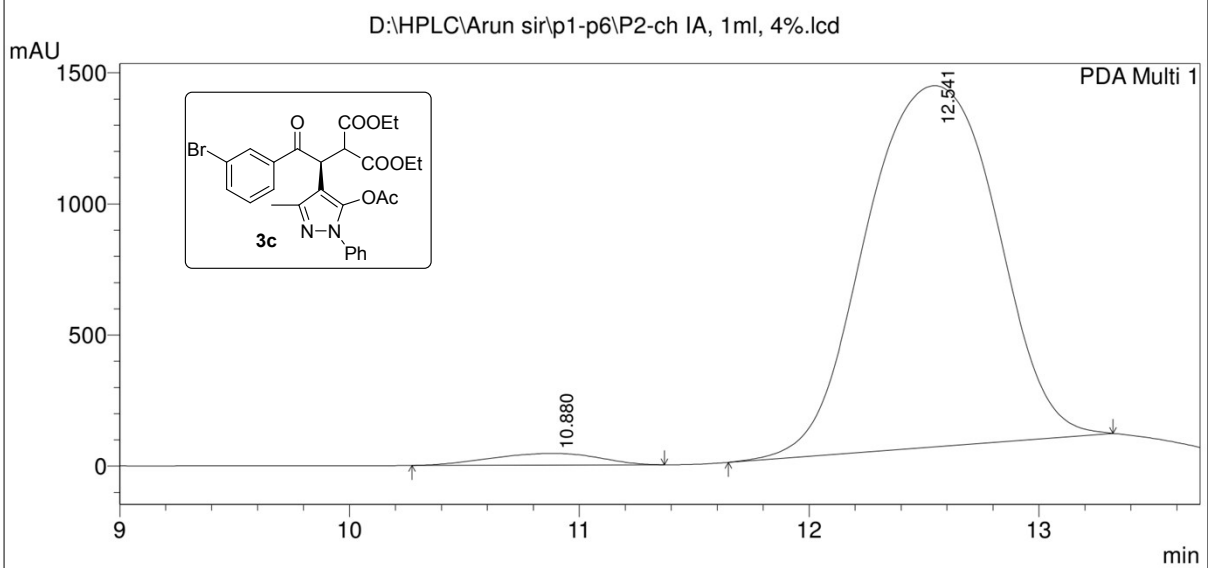

PeakTable

| Peak# | Ret. Time | Area     | Height  | Area %  | Height % |
|-------|-----------|----------|---------|---------|----------|
| 1     | 10.880    | 1446924  | 44444   | 2.581   | 3.126    |
| 2     | 12.541    | 54623572 | 1377290 | 97.419  | 96.874   |
| Total |           | 56070495 | 1421734 | 100.000 | 100.000  |

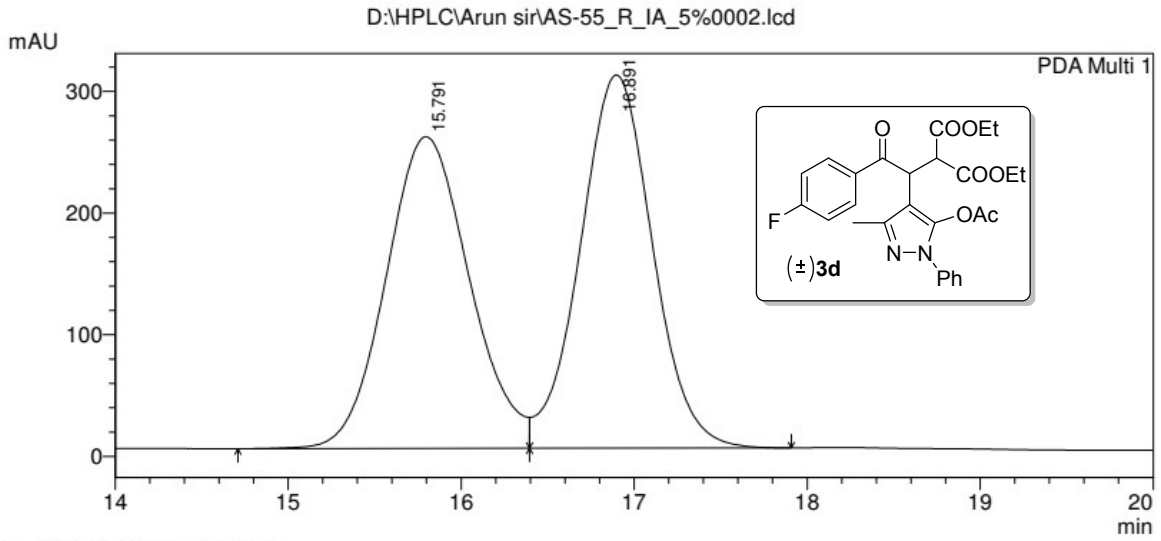

1 PDA Multi 1/254nm 4nm

PeakTable

PDA Ch1 254nm 4nm

| Peak# | Ret. Time | Area     | Height | Area %  | Height % |
|-------|-----------|----------|--------|---------|----------|
| 1     | 15.791    | 8589385  | 256322 | 49.043  | 45.511   |
| 2     | 16.891    | 8924684  | 306883 | 50.957  | 54.489   |
| Total |           | 17514069 | 563205 | 100.000 | 100.000  |

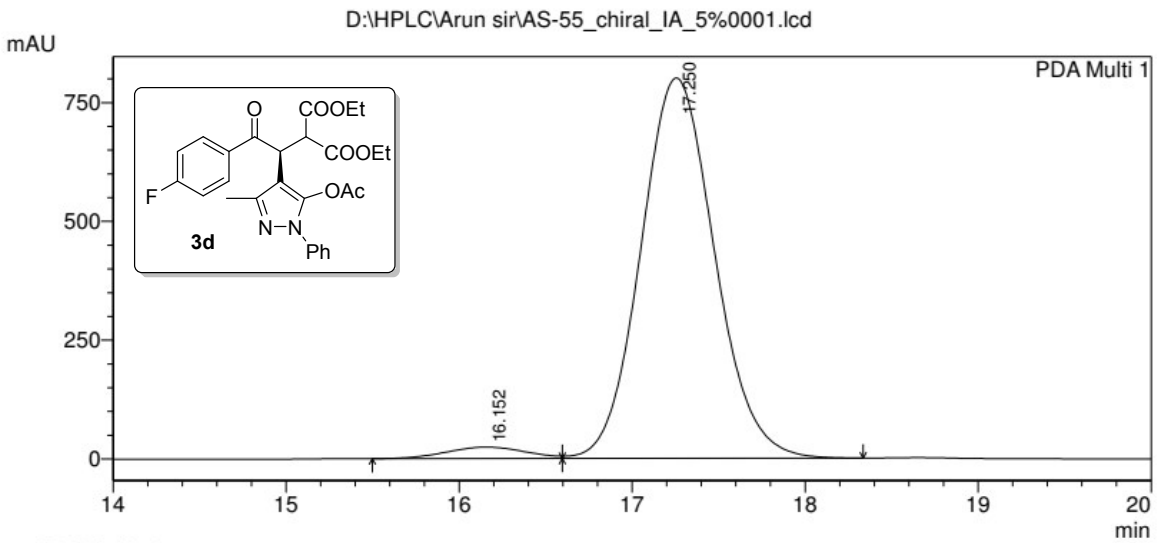

1 PDA Multi 1/254nm 4nm

PeakTable

PDA Ch1 254nm 4nm

| Peak# | Ret. Time | Area     | Height | Area %  | Height % |
|-------|-----------|----------|--------|---------|----------|
| 1     | 16.152    | 765618   | 24029  | 3.126   | 2.915    |
| 2     | 17.250    | 23725406 | 800279 | 96.874  | 97.085   |
| Total |           | 24491023 | 824308 | 100.000 | 100.000  |

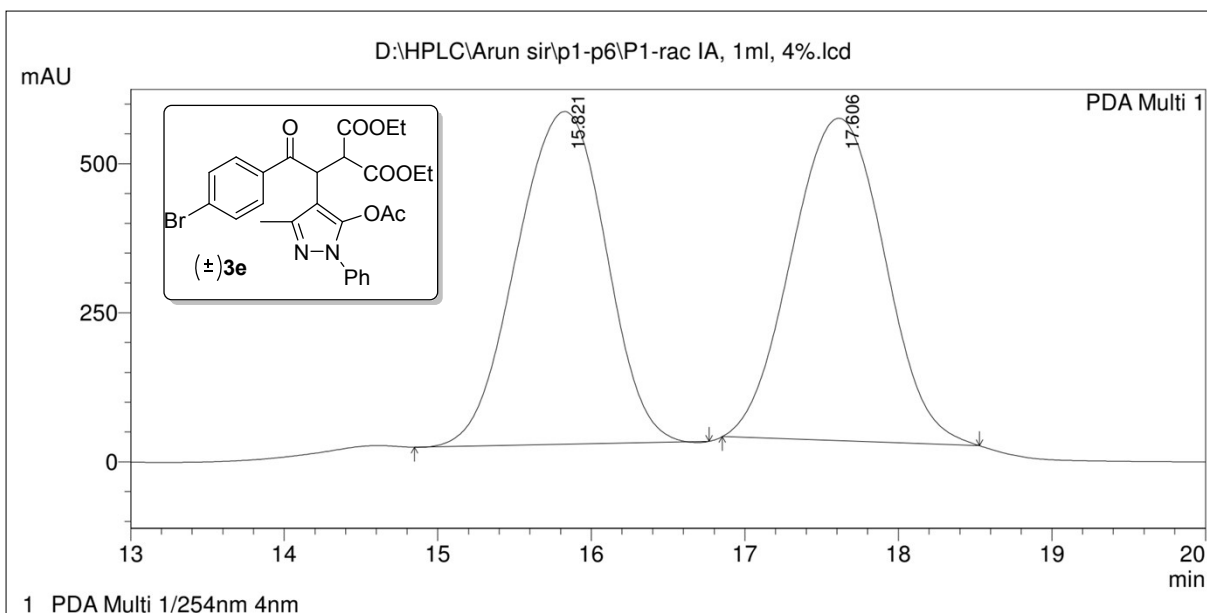

PeakTable

PDA Ch1 254nm 4nm

| Peak# | Ret. Time | Area     | Height  | Area %  | Height % |
|-------|-----------|----------|---------|---------|----------|
| 1     | 15.821    | 22554372 | 558173  | 49.762  | 50.783   |
| 2     | 17.606    | 22770048 | 540970  | 50.238  | 49.217   |
| Total |           | 45324420 | 1099143 | 100.000 | 100.000  |

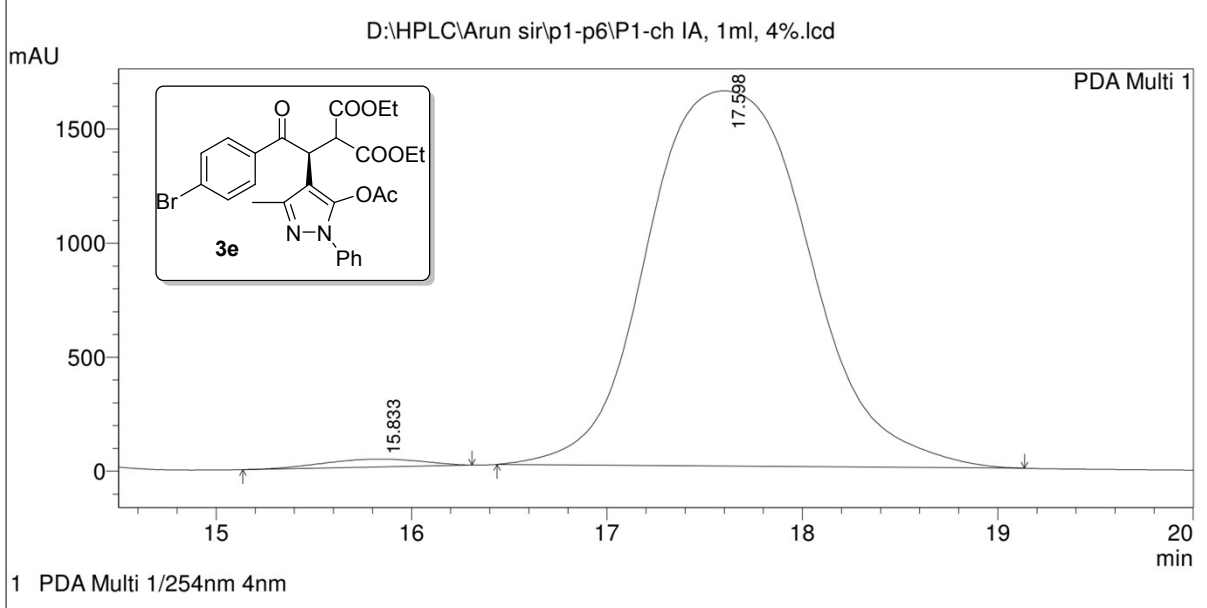

PeakTable

PDA Ch1 254nm 4nm

| Peak# | Ret. Time | Area     | Height  | Area %  | Height % |
|-------|-----------|----------|---------|---------|----------|
| 1     | 15.833    | 1214708  | 34422   | 1.272   | 2.050    |
| 2     | 17.598    | 94306096 | 1644906 | 98.728  | 97.950   |
| Total |           | 95520804 | 1679328 | 100.000 | 100.000  |

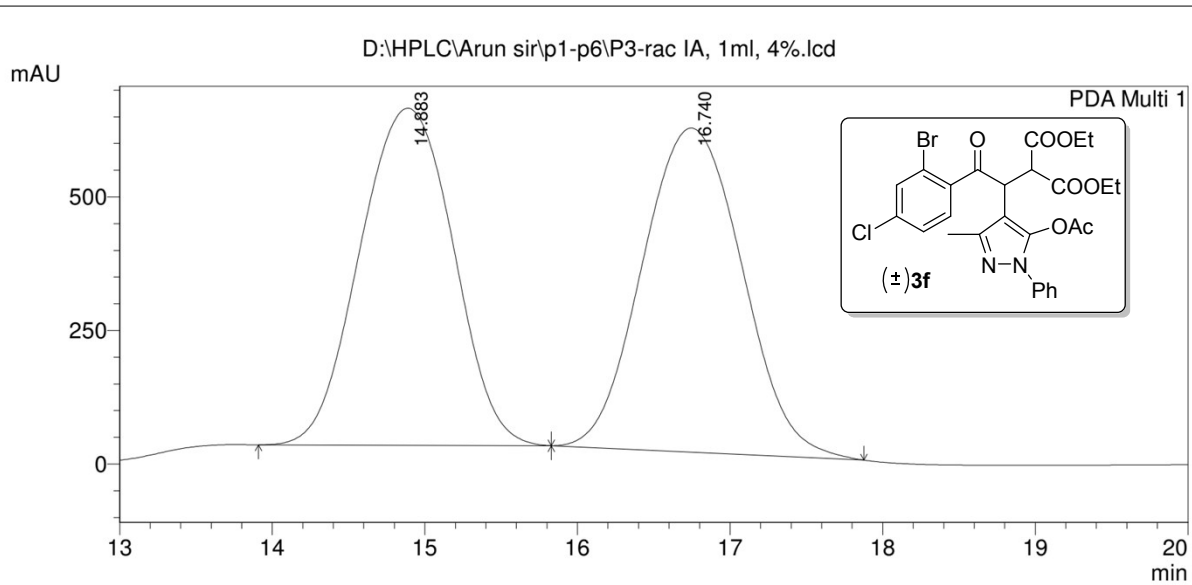

1 PDA Multi 1/254nm 4nm

PeakTable

PDA Ch1 254nm 4nm

| Peak# | Ret. Time | Area     | Height  | Area %  | Height % |
|-------|-----------|----------|---------|---------|----------|
| 1     | 14.883    | 26829850 | 630983  | 49.311  | 50.982   |
| 2     | 16.740    | 27580128 | 606685  | 50.689  | 49.018   |
| Total |           | 54409978 | 1237668 | 100.000 | 100.000  |

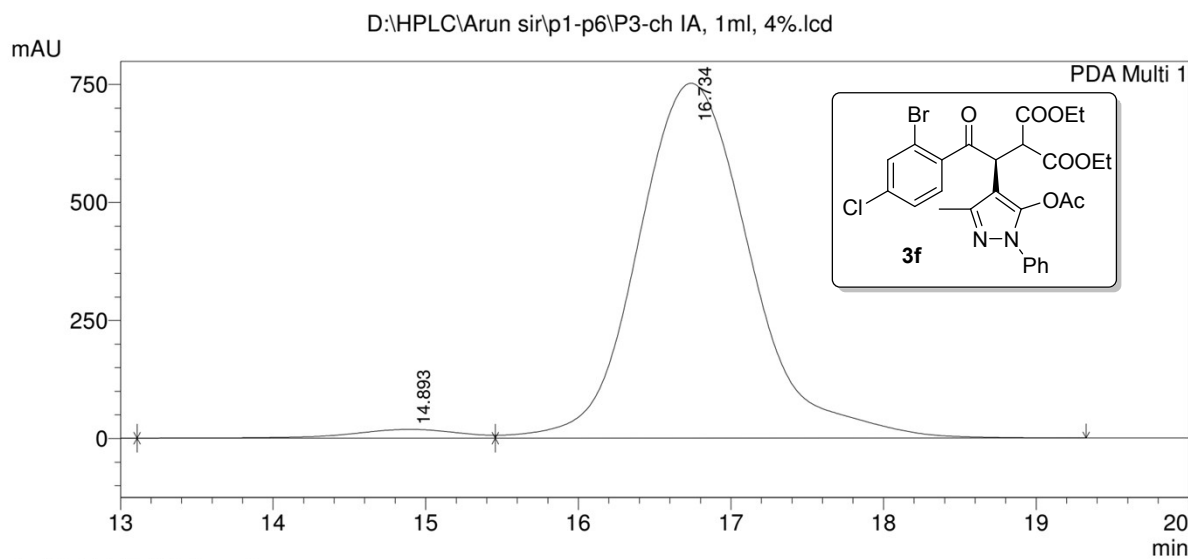

1 PDA Multi 1/254nm 4nm

PeakTable

PDA Ch1 254nm 4nm

| Peak# | Ret. Time | Area     | Height | Area %  | Height % |
|-------|-----------|----------|--------|---------|----------|
| 1     | 14.893    | 533316   | 14053  | 1.396   | 1.845    |
| 2     | 16.734    | 37683520 | 747716 | 98.604  | 98.155   |
| Total |           | 38216836 | 761769 | 100.000 | 100.000  |

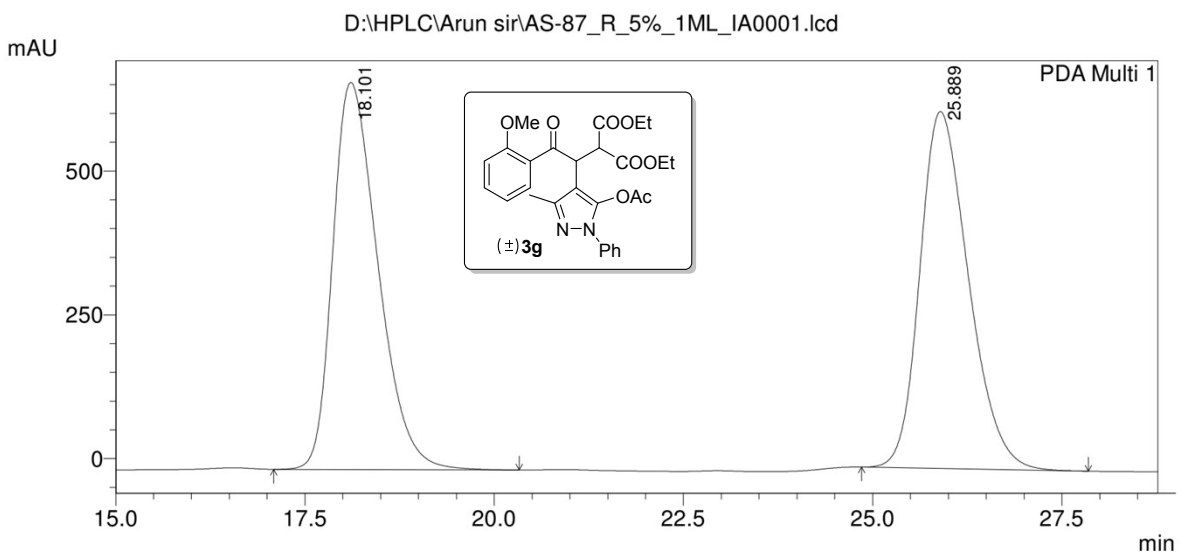

PeakTable

PDA Ch1 254nm 4nm

| Peak# | Ret. Time | Area     | Height  | Area %  | Height % |
|-------|-----------|----------|---------|---------|----------|
| 1     | 18.101    | 27961094 | 672705  | 50.175  | 52.022   |
| 2     | 25.889    | 27765837 | 620411  | 49.825  | 47.978   |
| Total |           | 55726931 | 1293116 | 100.000 | 100.000  |

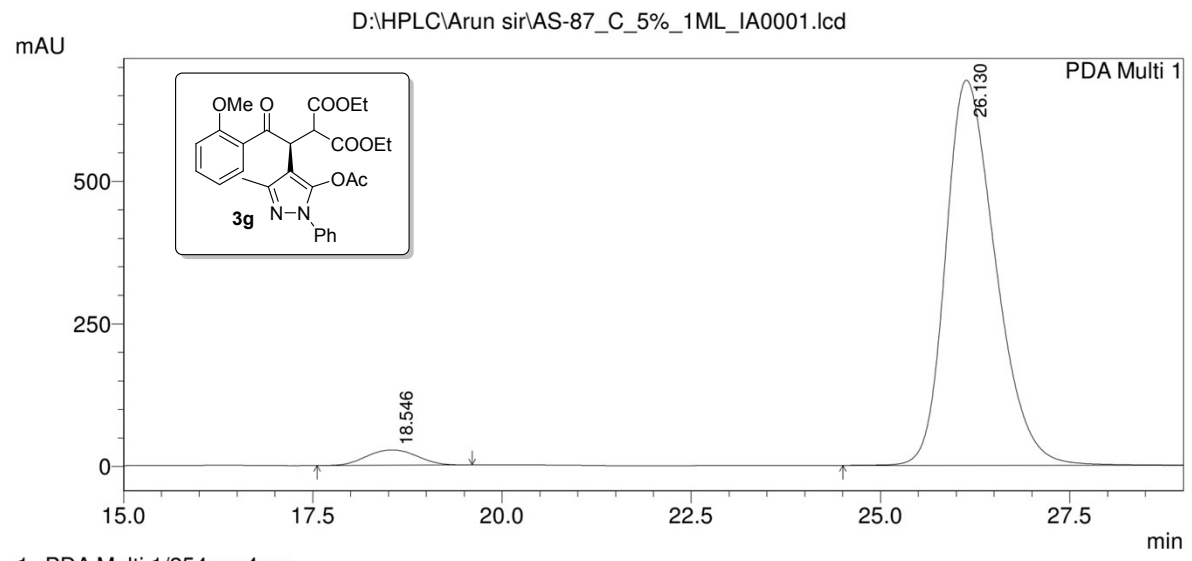

PeakTable

PDA Ch1 254nm 4nm

| Peak# | Ret. Time | Area     | Height | Area %  | Height % |
|-------|-----------|----------|--------|---------|----------|
| 1     | 18.546    | 1251969  | 26791  | 3.879   | 3.815    |
| 2     | 26.130    | 31021673 | 675532 | 96.121  | 96.185   |
| Total |           | 32273642 | 702323 | 100.000 | 100.000  |

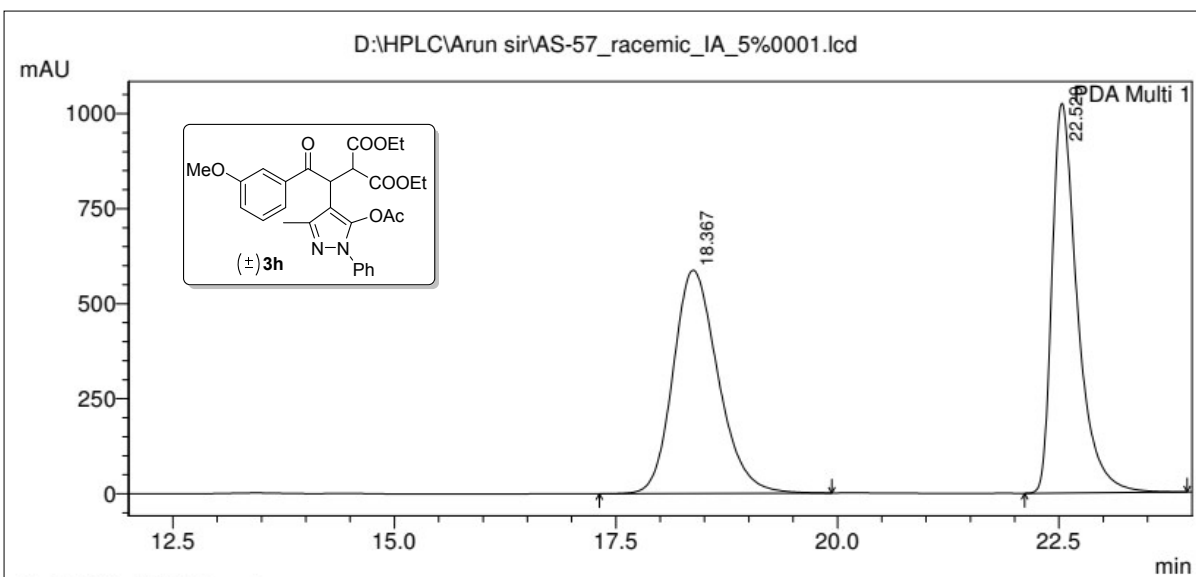

PeakTable

PDA Ch1 254nm 4nm

| Peak# | Ret. Time | Area     | Height  | Area %  | Height % |
|-------|-----------|----------|---------|---------|----------|
| 1     | 18.367    | 20761944 | 587377  | 50.455  | 36.435   |
| 2     | 22.529    | 20387622 | 1024768 | 49.545  | 63.565   |
| Total |           | 41149566 | 1612145 | 100.000 | 100.000  |

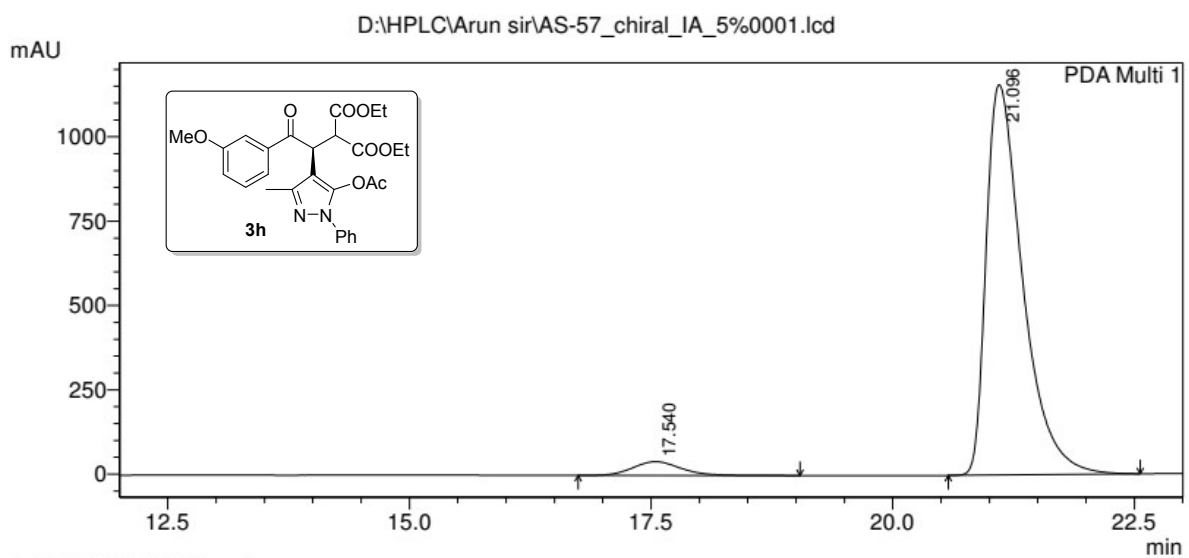

PeakTable

PDA Ch1 254nm 4nm

| Peak# | Ret. Time | Area     | Height  | Area %  | Height % |
|-------|-----------|----------|---------|---------|----------|
| 1     | 17.540    | 1436433  | 41090   | 4.513   | 3.429    |
| 2     | 21.096    | 30389947 | 1157315 | 95.487  | 96.571   |
| Total |           | 31826380 | 1198405 | 100.000 | 100.000  |



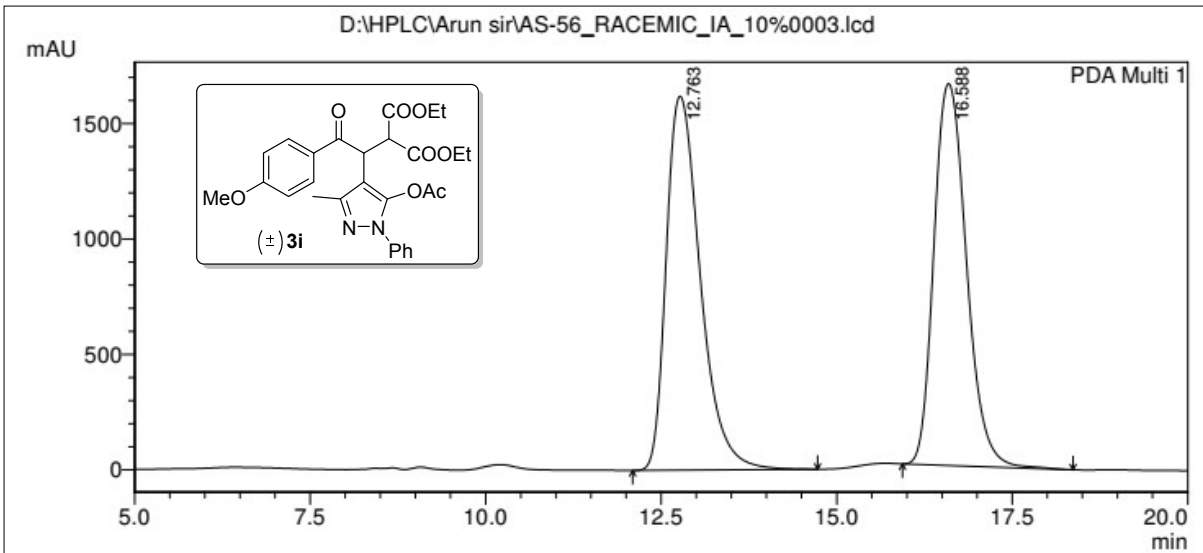

PeakTable

PDA Ch1 254nm 4nm

| Peak# | Ret. Time | Area      | Height  | Area %  | Height % |
|-------|-----------|-----------|---------|---------|----------|
| 1     | 12.763    | 54717873  | 1619988 | 50.652  | 49.481   |
| 2     | 16.588    | 53308147  | 1653950 | 49.348  | 50.519   |
| Total |           | 108026020 | 3273939 | 100.000 | 100.000  |

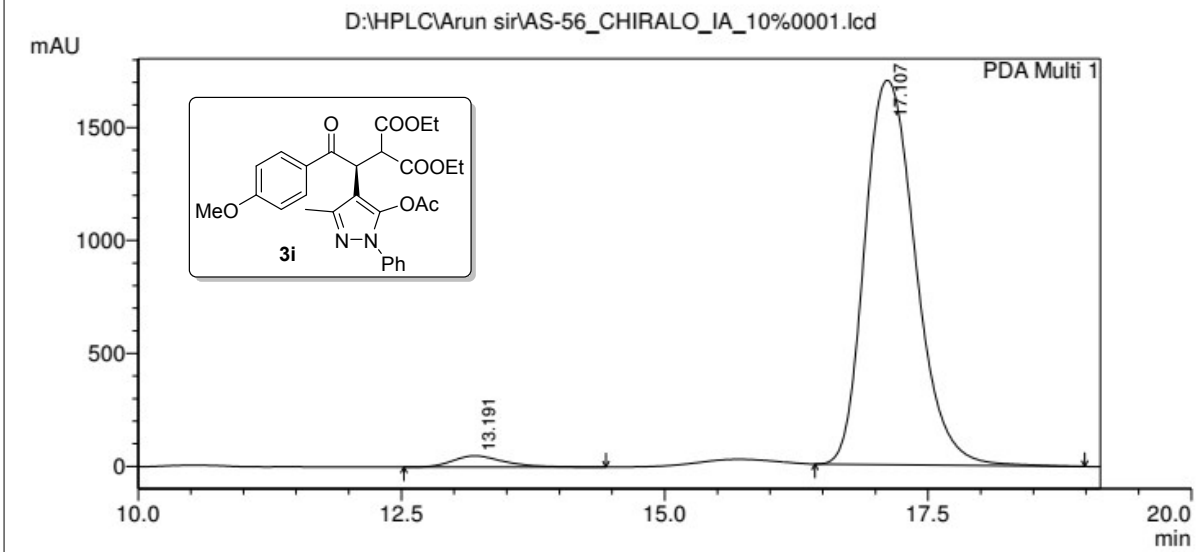

PeakTable

PDA Ch1 254nm 4nm

| Peak# | Ret. Time | Area     | Height  | Area %  | Height % |
|-------|-----------|----------|---------|---------|----------|
| 1     | 13.191    | 1688292  | 49998   | 2.862   | 2.854    |
| 2     | 17.107    | 57303046 | 1701768 | 97.138  | 97.146   |
| Total |           | 58991338 | 1751766 | 100.000 | 100.000  |

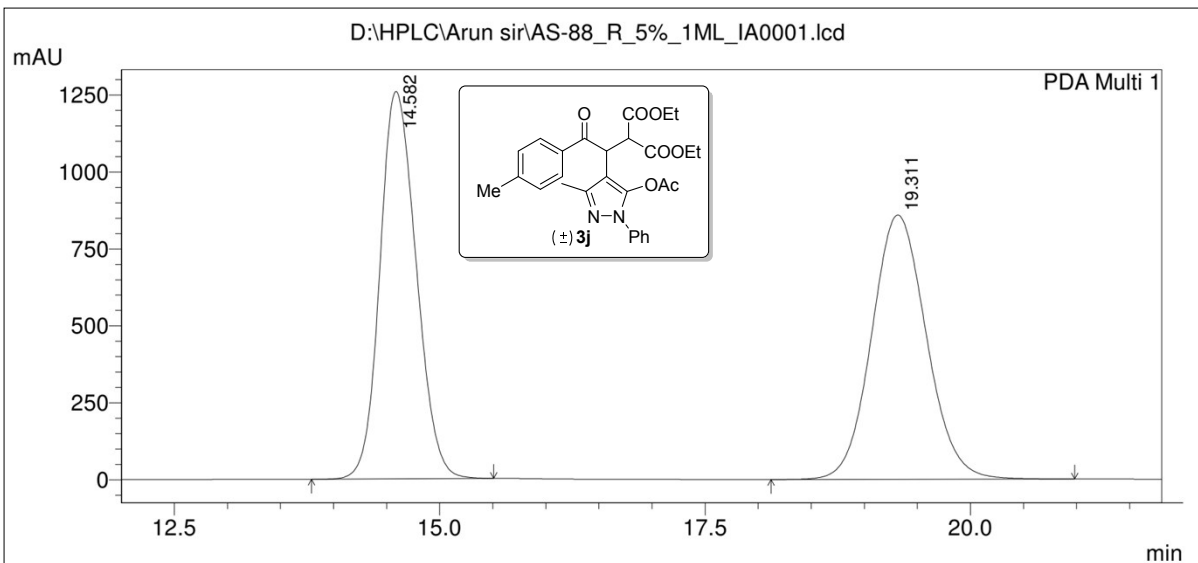

1 PDA Multi 1/254nm 4nm

PeakTable

PDA Ch1 254nm 4nm

| Peak# | Ret. Time | Area     | Height  | Area %  | Height % |
|-------|-----------|----------|---------|---------|----------|
| 1     | 14.582    | 29955948 | 1258861 | 49.283  | 59.440   |
| 2     | 19.311    | 30827972 | 858997  | 50.717  | 40.560   |
| Total |           | 60783920 | 2117857 | 100.000 | 100.000  |

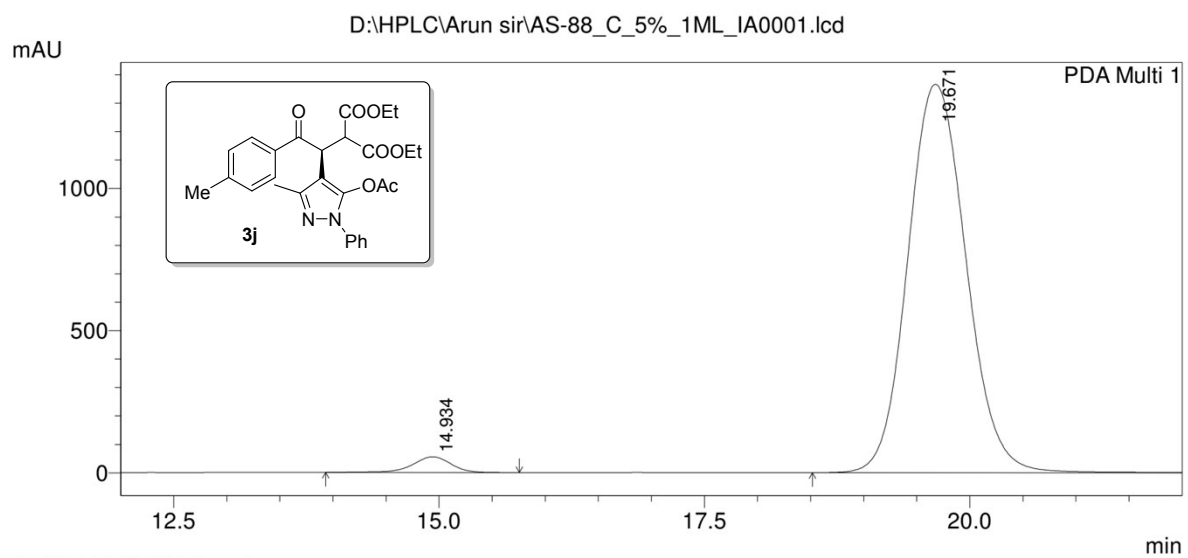

1 PDA Multi 1/254nm 4nm

PeakTable

PDA Ch1 254nm 4nm

| Peak# | Ret. Time | Area     | Height  | Area %  | Height % |
|-------|-----------|----------|---------|---------|----------|
| 1     | 14.934    | 1394943  | 54911   | 2.602   | 3.864    |
| 2     | 19.671    | 52208655 | 1366051 | 97.398  | 96.136   |
| Total |           | 53603598 | 1420962 | 100.000 | 100.000  |

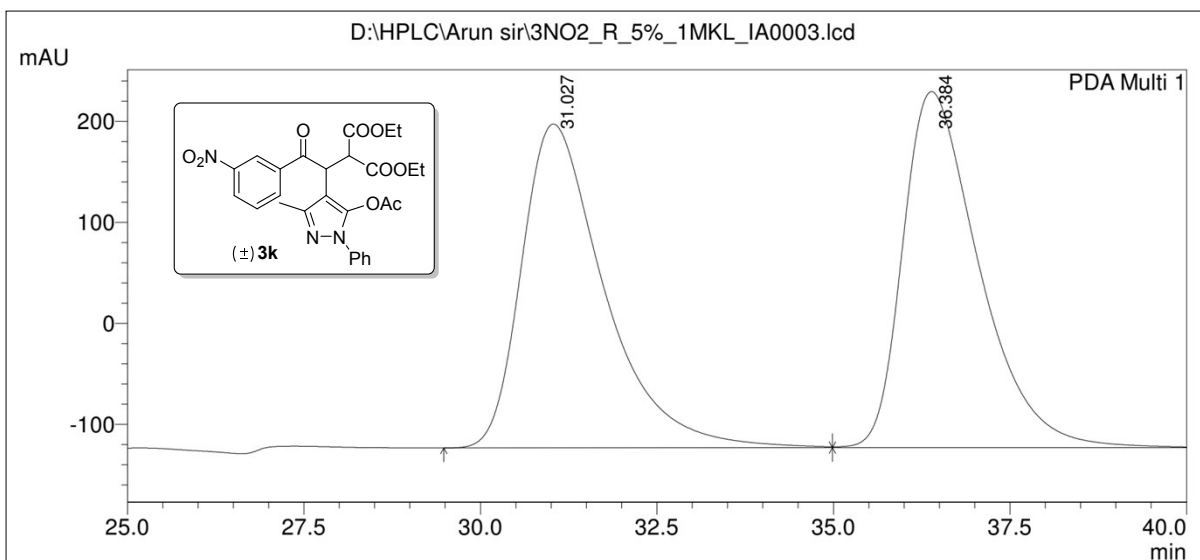

1 PDA Multi 1/254nm 4nm

PeakTable

PDA Ch1 254nm 4nm

| Peak# | Ret. Time | Area     | Height | Area %  | Height % |
|-------|-----------|----------|--------|---------|----------|
| 1     | 31.027    | 26261130 | 320704 | 49.724  | 47.622   |
| 2     | 36.384    | 26552644 | 352739 | 50.276  | 52.378   |
| Total |           | 52813774 | 673443 | 100.000 | 100.000  |

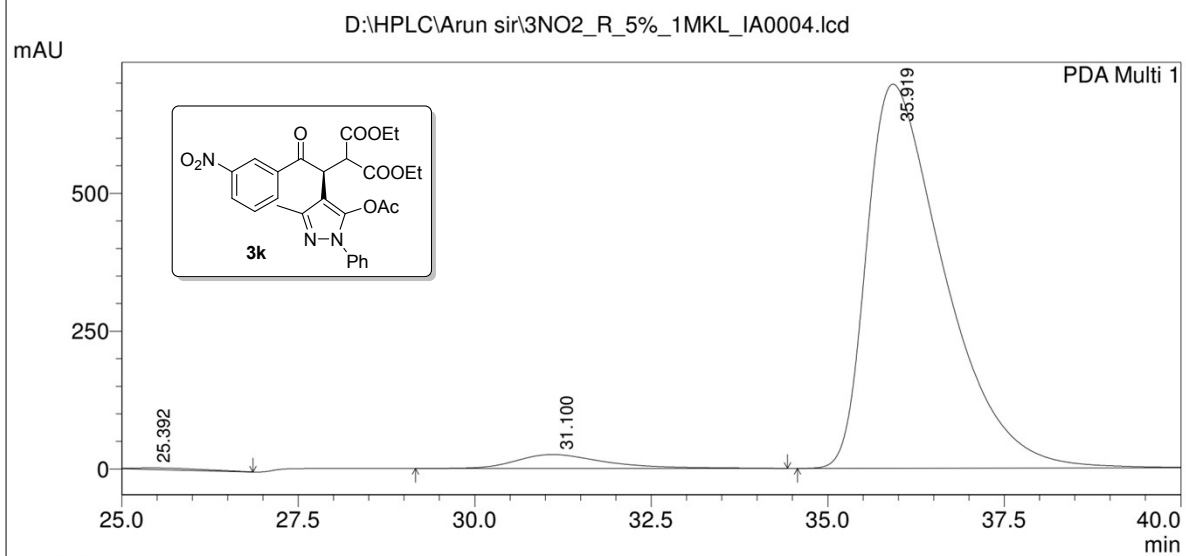

1 PDA Multi 1/254nm 4nm

PeakTable

PDA Ch1 254nm 4nm

| Peak# | Ret. Time | Area     | Height | Area %  | Height % |
|-------|-----------|----------|--------|---------|----------|
| 1     | 31.100    | 2234379  | 25361  | 4.013   | 3.510    |
| 2     | 35.919    | 53447512 | 697114 | 95.987  | 96.490   |
| Total |           | 55681891 | 722475 | 100.000 | 100.000  |

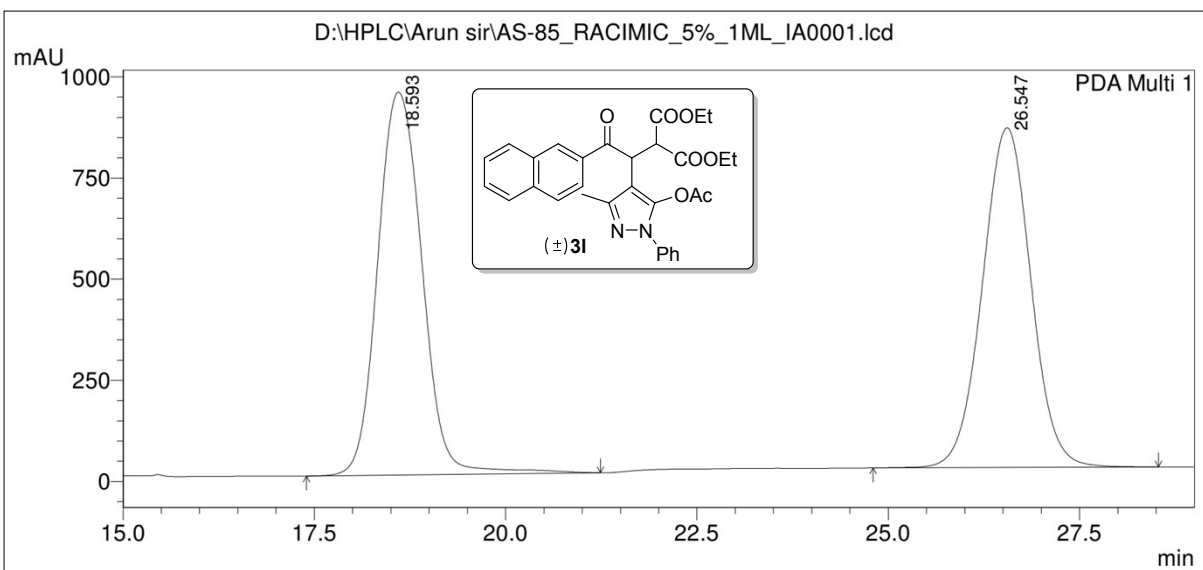

PeakTable

PDA Ch1 254nm 4nm

| Peak# | Ret. Time | Area     | Height  | Area %  | Height % |
|-------|-----------|----------|---------|---------|----------|
| 1     | 18.593    | 38149497 | 945853  | 50.736  | 52.984   |
| 2     | 26.547    | 37042392 | 839324  | 49.264  | 47.016   |
| Total |           | 75191889 | 1785176 | 100.000 | 100.000  |

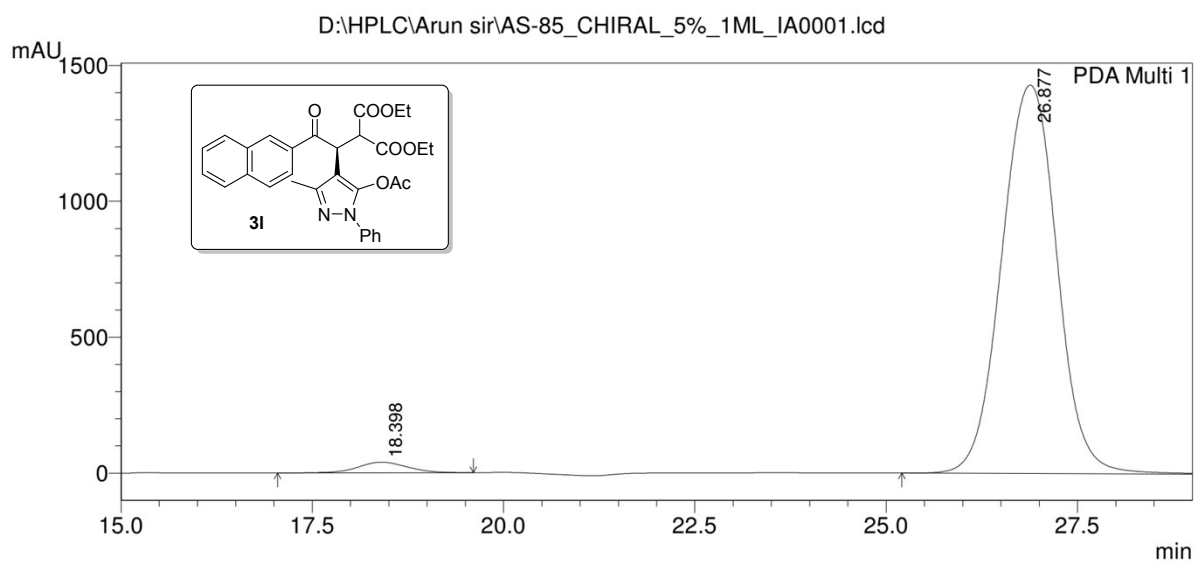

PeakTable

PDA Ch1 254nm 4nm

| Peak# | Ret. Time | Area     | Height  | Area %  | Height % |
|-------|-----------|----------|---------|---------|----------|
| 1     | 18.398    | 1755382  | 39022   | 2.370   | 2.657    |
| 2     | 26.877    | 72326546 | 1429399 | 97.630  | 97.343   |
| Total |           | 74081928 | 1468420 | 100.000 | 100.000  |

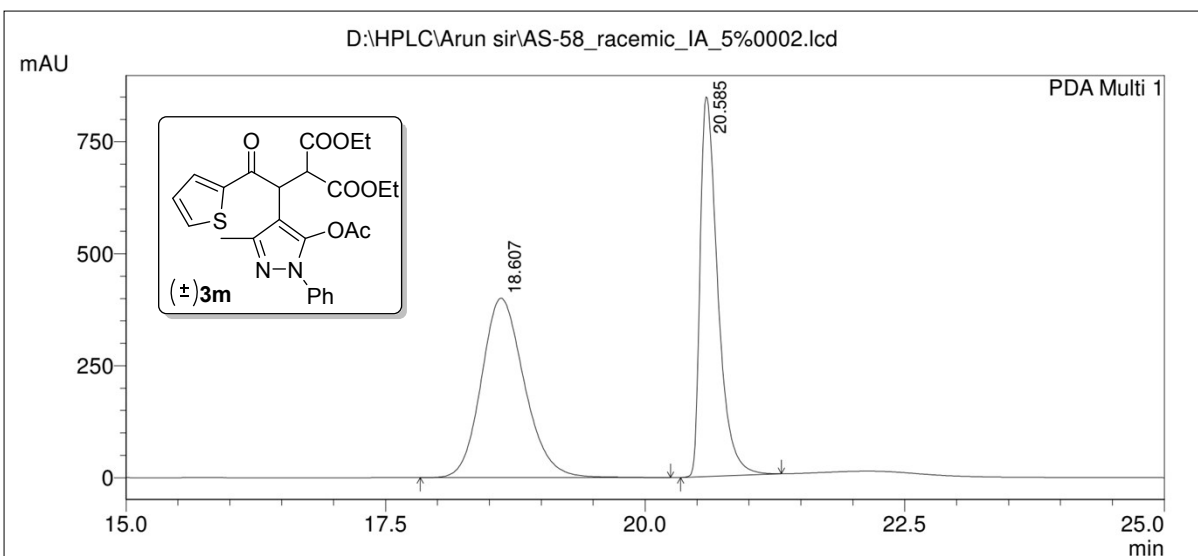

1 PDA Multi 1/254nm 4nm

PeakTable

PDA Ch1 254nm 4nm

| Peak# | Ret. Time | Area     | Height  | Area %  | Height % |
|-------|-----------|----------|---------|---------|----------|
| 1     | 18.607    | 11533326 | 400750  | 53.515  | 32.098   |
| 2     | 20.585    | 10018263 | 847757  | 46.485  | 67.902   |
| Total |           | 21551589 | 1248507 | 100.000 | 100.000  |

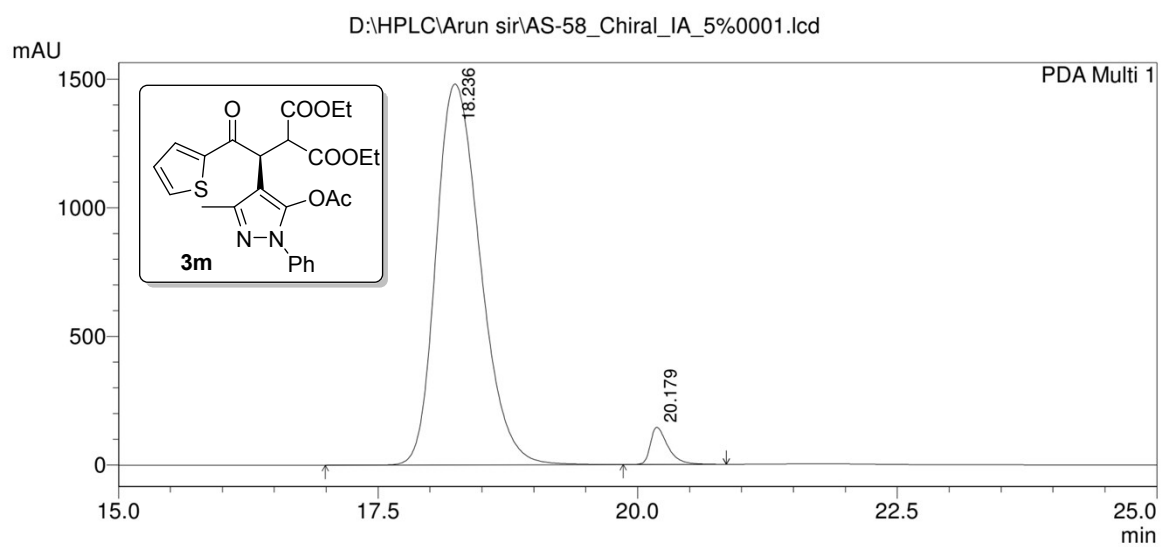

1 PDA Multi 1/254nm 4nm

PeakTable

PDA Ch1 254nm 4nm

| Peak# | Ret. Time | Area     | Height  | Area %  | Height % |
|-------|-----------|----------|---------|---------|----------|
| 1     | 18.236    | 43876138 | 1481099 | 96.279  | 91.089   |
| 2     | 20.179    | 1695744  | 144894  | 3.721   | 8.911    |
| Total |           | 45571882 | 1625993 | 100.000 | 100.000  |

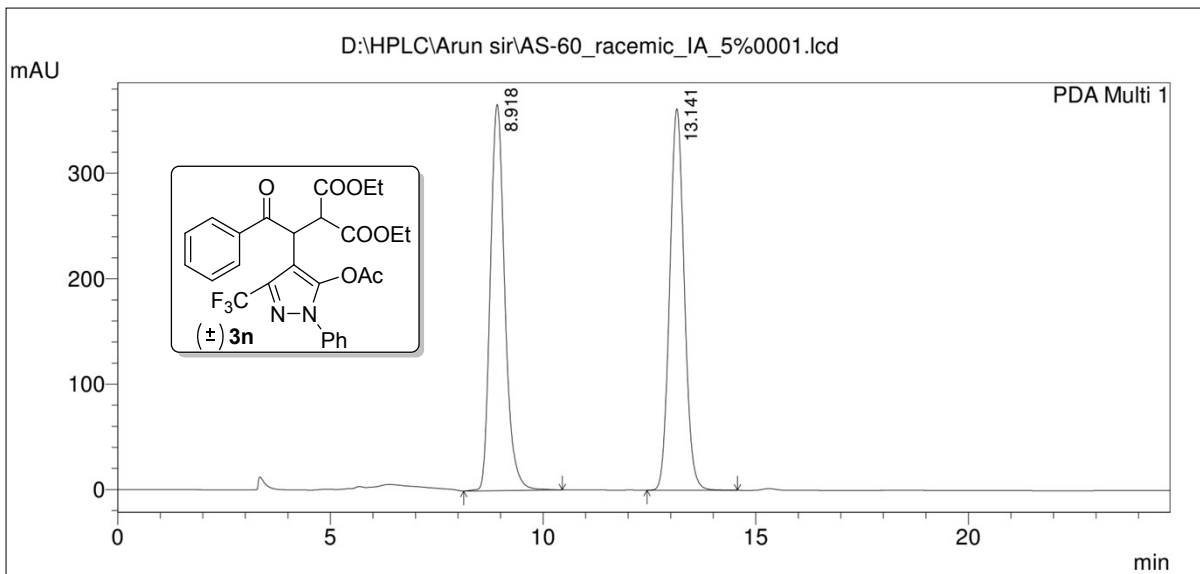

PeakTable

PDA Ch1 254nm 4nm

| Peak# | Ret. Time | Area     | Height | Area %  | Height % |
|-------|-----------|----------|--------|---------|----------|
| 1     | 8.918     | 8675873  | 366535 | 50.151  | 50.313   |
| 2     | 13.141    | 8623572  | 361981 | 49.849  | 49.687   |
| Total |           | 17299445 | 728516 | 100.000 | 100.000  |

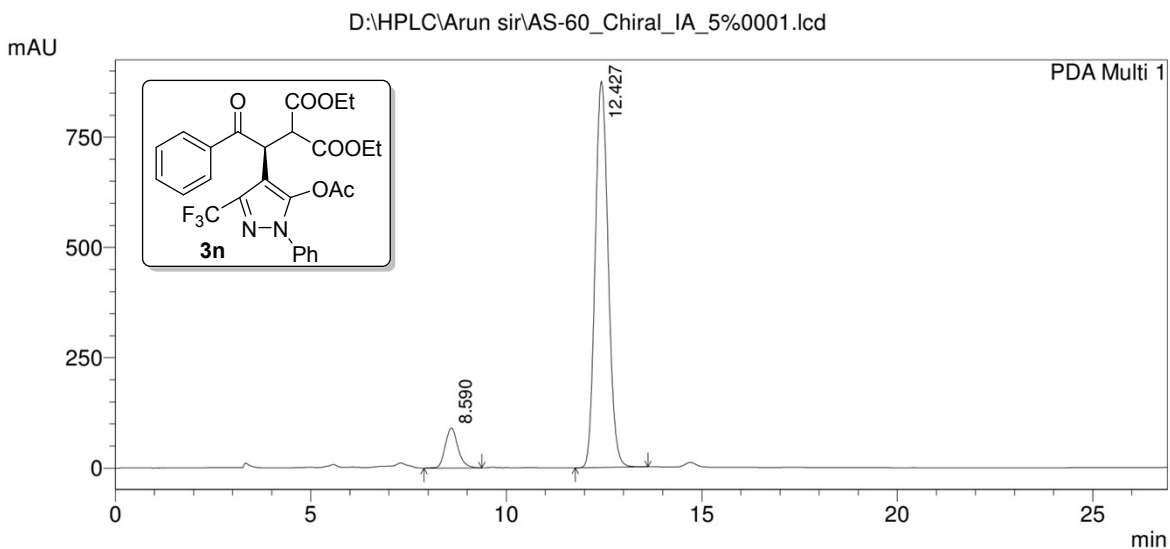

PeakTable

PDA Ch1 254nm 4nm

| Peak# | Ret. Time | Area     | Height | Area %  | Height % |
|-------|-----------|----------|--------|---------|----------|
| 1     | 8.590     | 2060829  | 90352  | 9.241   | 9.359    |
| 2     | 12.427    | 20240564 | 875008 | 90.759  | 90.641   |
| Total |           | 22301393 | 965359 | 100.000 | 100.000  |

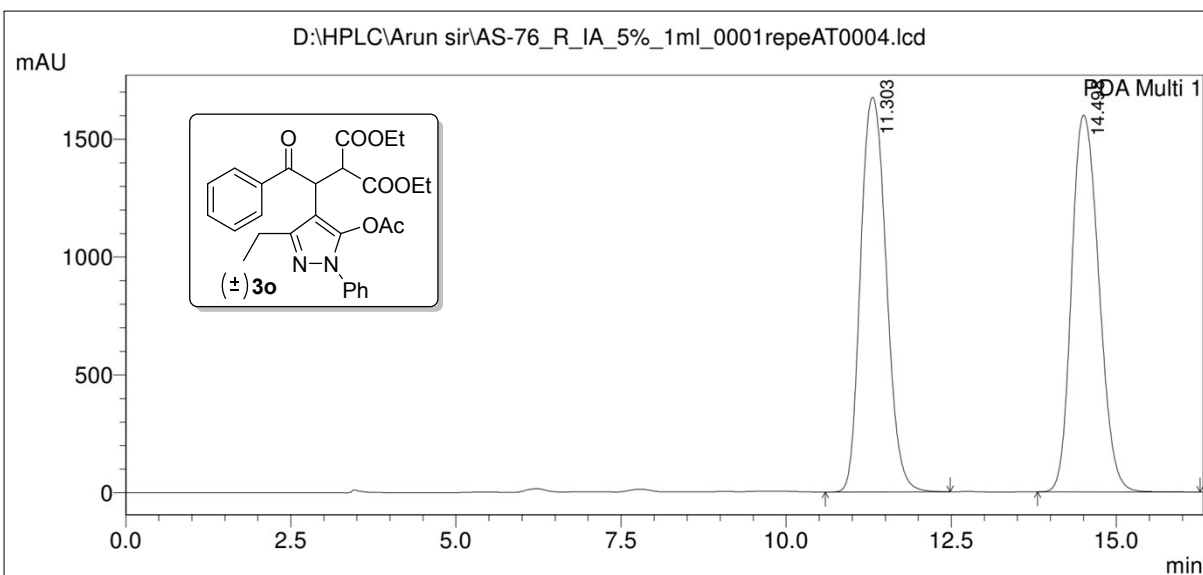

1 PDA Multi 1/254nm 4nm

PeakTable

PDA Ch1 254nm 4nm

| Peak# | Ret. Time | Area     | Height  | Area %  | Height % |
|-------|-----------|----------|---------|---------|----------|
| 1     | 11.303    | 45266761 | 1674681 | 49.580  | 51.155   |
| 2     | 14.498    | 46033621 | 1599068 | 50.420  | 48.845   |
| Total |           | 91300383 | 3273749 | 100.000 | 100.000  |

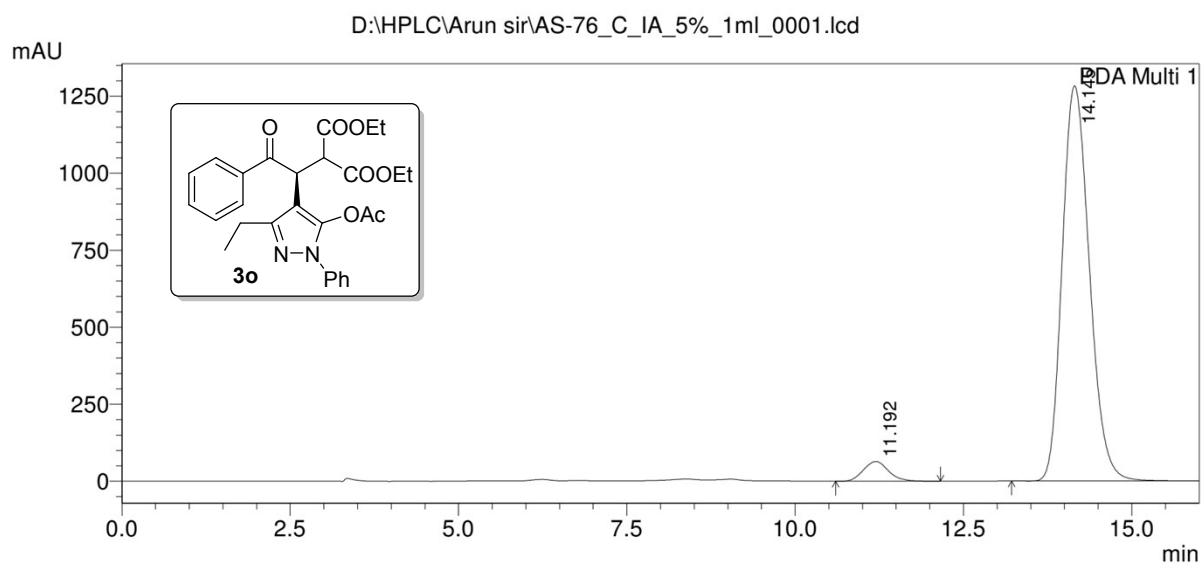

1 PDA Multi 1/254nm 4nm

PeakTable

PDA Ch1 254nm 4nm

| Peak# | Ret. Time | Area     | Height  | Area %  | Height % |
|-------|-----------|----------|---------|---------|----------|
| 1     | 11.192    | 1668952  | 64252   | 4.428   | 4.770    |
| 2     | 14.145    | 36019041 | 1282618 | 95.572  | 95.230   |
| Total |           | 37687994 | 1346870 | 100.000 | 100.000  |

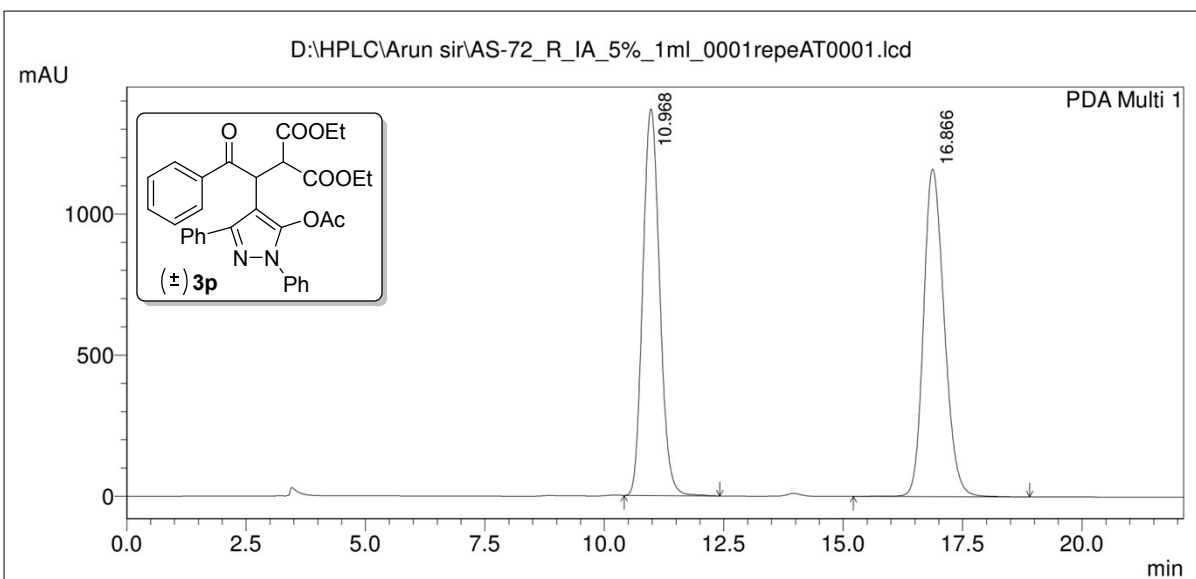

PeakTable

PDA Ch1 254nm 4nm

| Peak# | Ret. Time | Area     | Height  | Area %  | Height % |
|-------|-----------|----------|---------|---------|----------|
| 1     | 10.968    | 33703911 | 1369666 | 49.065  | 54.150   |
| 2     | 16.866    | 34988986 | 1159732 | 50.935  | 45.850   |
| Total |           | 68692896 | 2529398 | 100.000 | 100.000  |

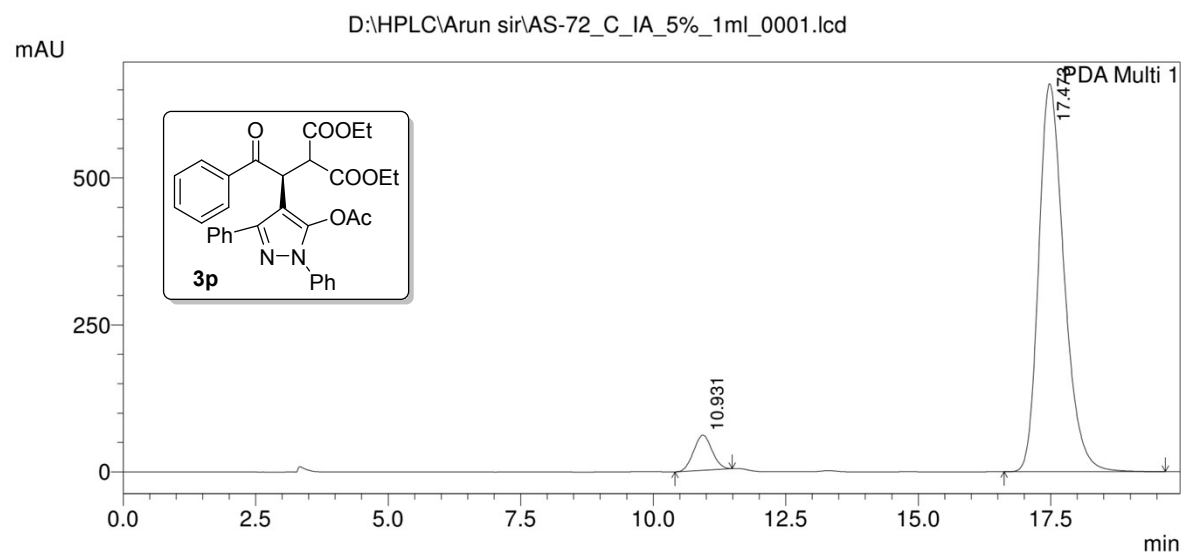

PeakTable

PDA Ch1 254nm 4nm

| Peak# | Ret. Time | Area     | Height | Area %  | Height % |
|-------|-----------|----------|--------|---------|----------|
| 1     | 10.931    | 1444969  | 59841  | 6.192   | 8.318    |
| 2     | 17.473    | 21890063 | 659609 | 93.808  | 91.682   |
| Total |           | 23335032 | 719450 | 100.000 | 100.000  |



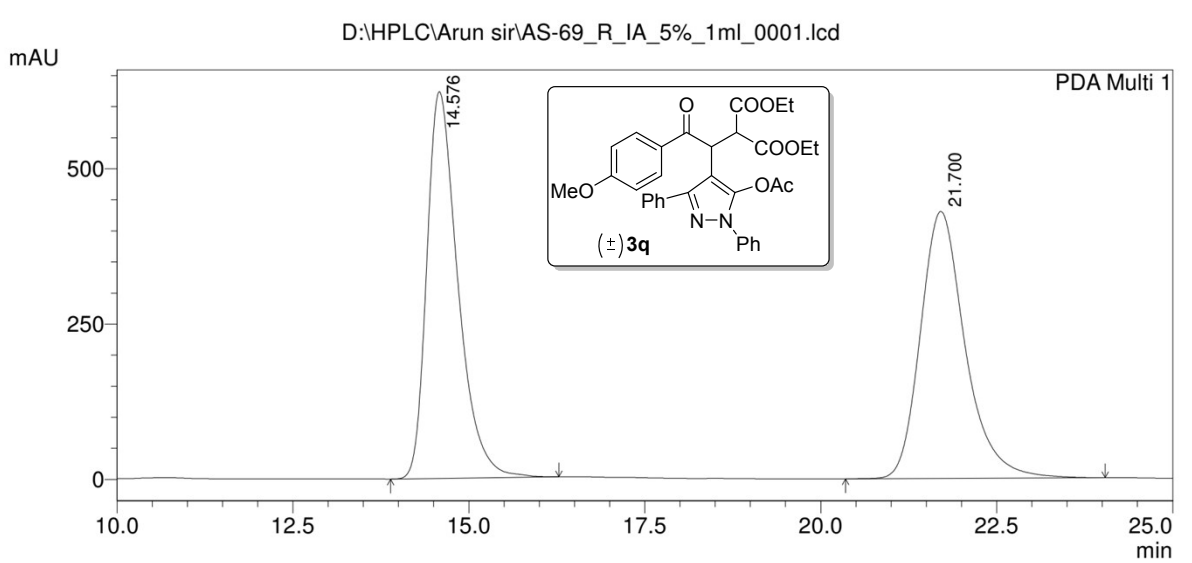

1 PDA Multi 1/254nm 4nm

PeakTable

PDA Ch1 254nm 4nm

| Peak# | Ret. Time | Area     | Height  | Area %  | Height % |
|-------|-----------|----------|---------|---------|----------|
| 1     | 14.576    | 19153561 | 622617  | 50.219  | 59.154   |
| 2     | 21.700    | 18986471 | 429919  | 49.781  | 40.846   |
| Total |           | 38140032 | 1052536 | 100.000 | 100.000  |

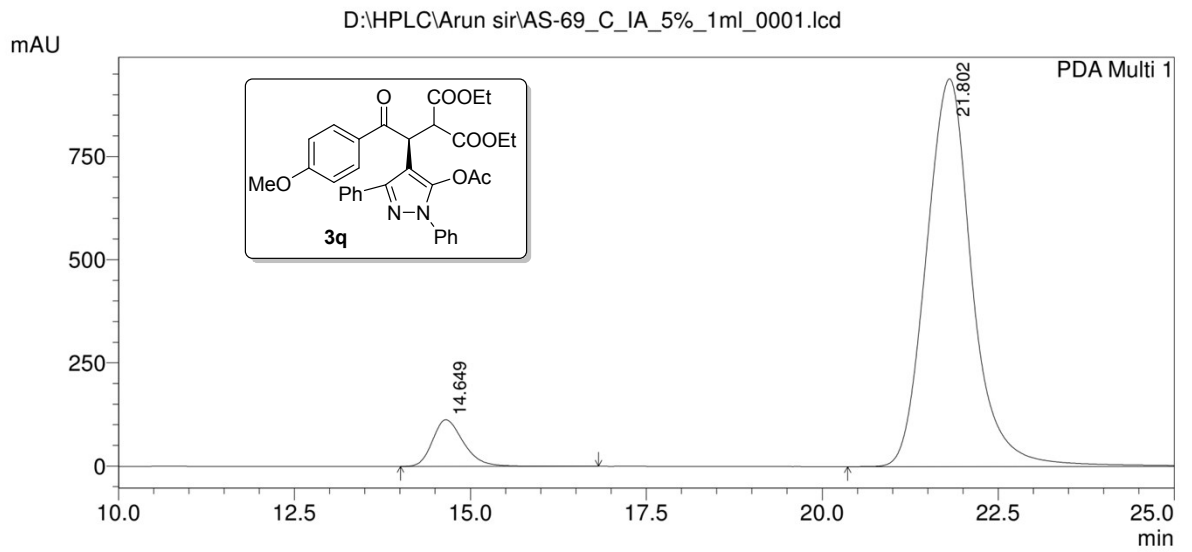

1 PDA Multi 1/254nm 4nm

PeakTable

PDA Ch1 254nm 4nm

| Peak# | Ret. Time | Area     | Height  | Area %  | Height % |
|-------|-----------|----------|---------|---------|----------|
| 1     | 14.649    | 3469732  | 113260  | 7.538   | 10.758   |
| 2     | 21.802    | 42561829 | 939556  | 92.462  | 89.242   |
| Total |           | 46031560 | 1052816 | 100.000 | 100.000  |

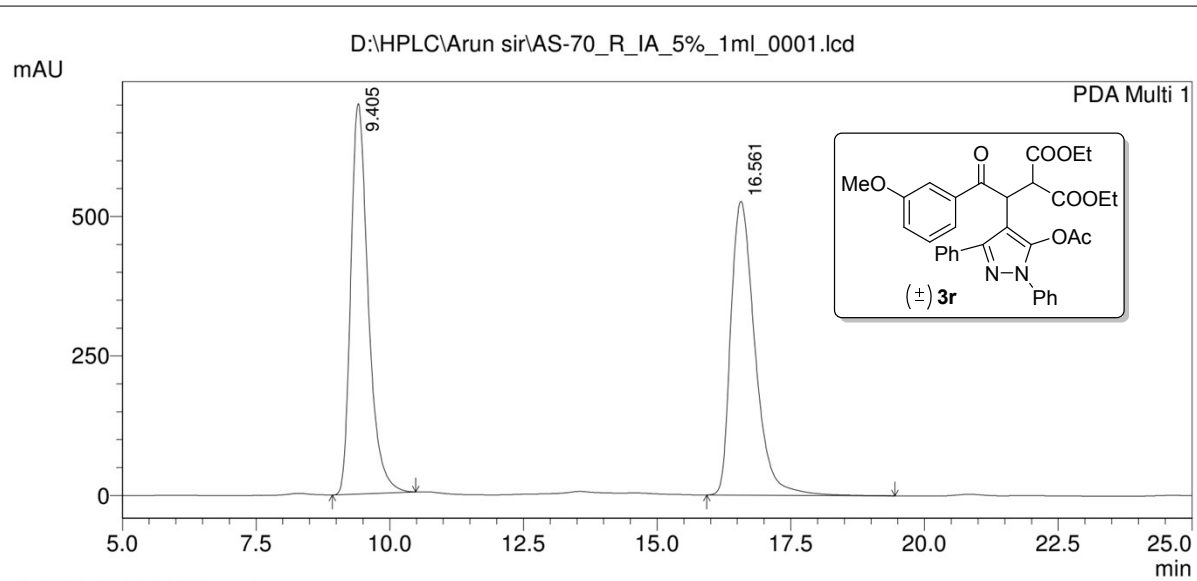

1 PDA Multi 1/254nm 4nm

PeakTable

PDA Ch1 254nm 4nm

| Peak# | Ret. Time | Area     | Height  | Area %  | Height % |
|-------|-----------|----------|---------|---------|----------|
| 1     | 9.405     | 15890377 | 699742  | 49.035  | 57.064   |
| 2     | 16.561    | 16515813 | 526508  | 50.965  | 42.936   |
| Total |           | 32406190 | 1226249 | 100.000 | 100.000  |

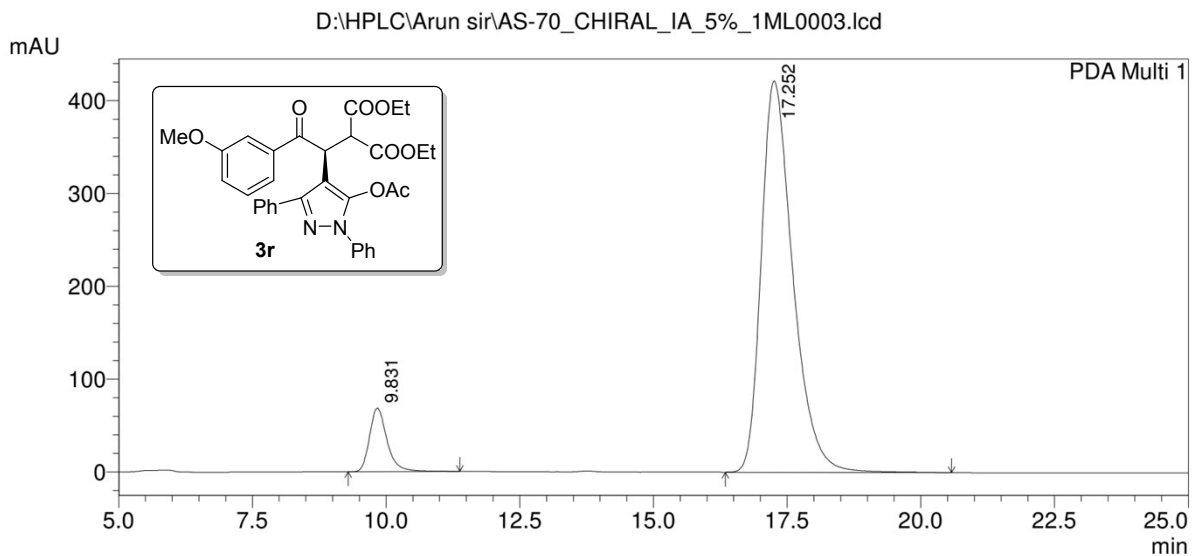

1 PDA Multi 1/254nm 4nm

PeakTable

PDA Ch1 254nm 4nm

| Peak# | Ret. Time | Area     | Height | Area %  | Height % |
|-------|-----------|----------|--------|---------|----------|
| 1     | 9.831     | 1567316  | 68575  | 8.297   | 13.992   |
| 2     | 17.252    | 17321744 | 421534 | 91.703  | 86.008   |
| Total |           | 18889060 | 490109 | 100.000 | 100.000  |

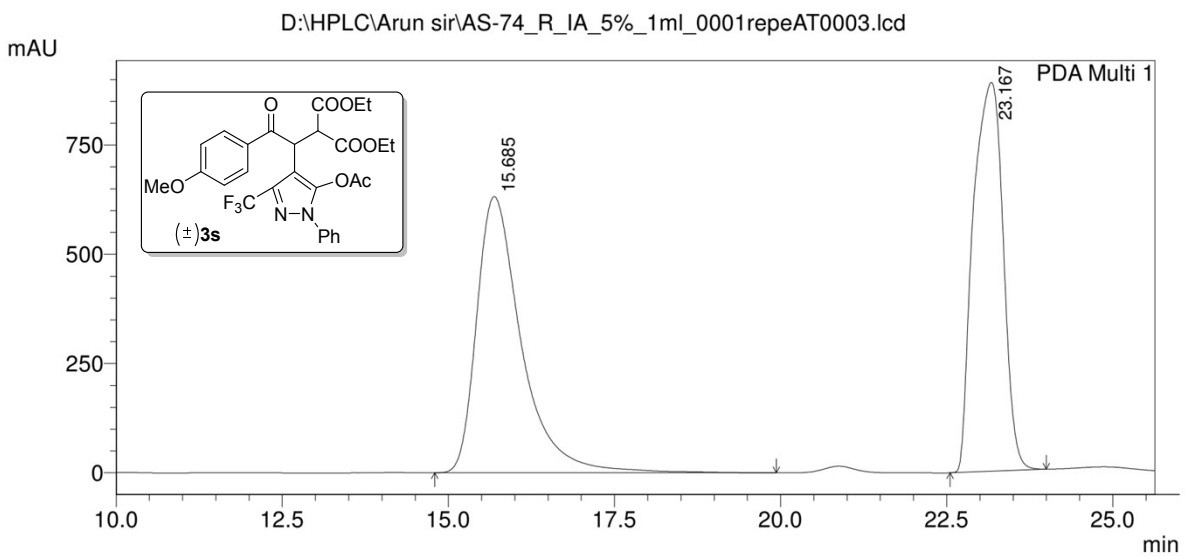

1 PDA Multi 1/254nm 4nm

PeakTable

PDA Ch1 254nm 4nm

| Peak# | Ret. Time | Area     | Height  | Area %  | Height % |
|-------|-----------|----------|---------|---------|----------|
| 1     | 15.685    | 29657805 | 632018  | 51.570  | 41.531   |
| 2     | 23.167    | 27852432 | 889779  | 48.430  | 58.469   |
| Total |           | 57510237 | 1521797 | 100.000 | 100.000  |

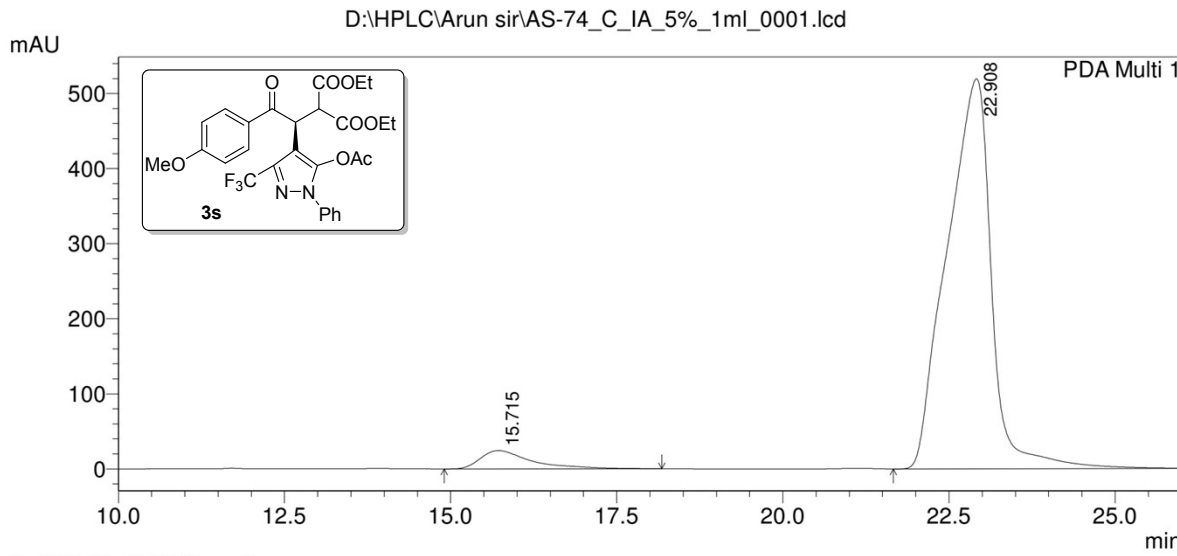

1 PDA Multi 1/254nm 4nm

PeakTable

PDA Ch1 254nm 4nm

| Peak# | Ret. Time | Area     | Height | Area %  | Height % |
|-------|-----------|----------|--------|---------|----------|
| 1     | 15.715    | 1303694  | 24450  | 5.113   | 4.493    |
| 2     | 22.908    | 24195121 | 519740 | 94.887  | 95.507   |
| Total |           | 25498815 | 544190 | 100.000 | 100.000  |

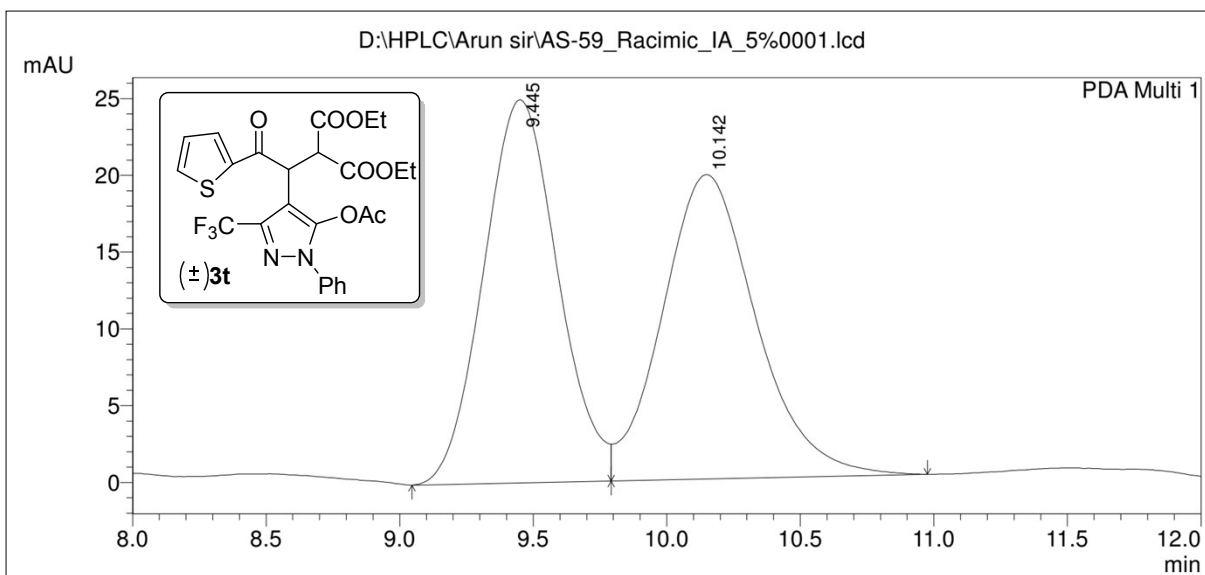

PeakTable

PDA Ch1 254nm 4nm

| Peak# | Ret. Time | Area   | Height | Area %  | Height % |
|-------|-----------|--------|--------|---------|----------|
| 1     | 9.445     | 483597 | 24964  | 49.930  | 55.728   |
| 2     | 10.142    | 484948 | 19832  | 50.070  | 44.272   |
| Total |           | 968544 | 44796  | 100.000 | 100.000  |

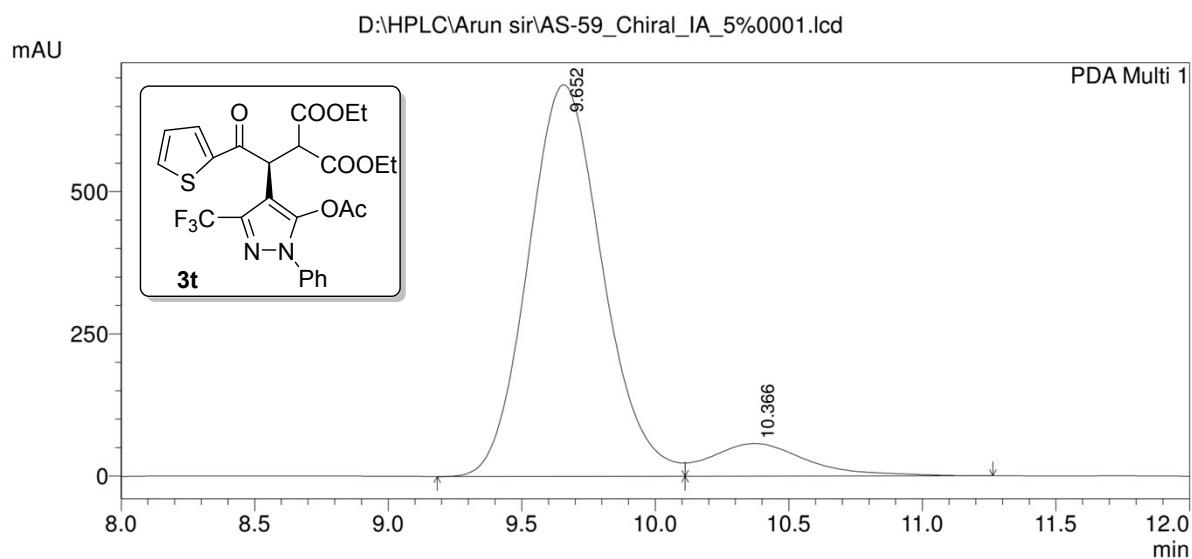

PeakTable

PDA Ch1 254nm 4nm

| Peak# | Ret. Time | Area     | Height | Area %  | Height % |
|-------|-----------|----------|--------|---------|----------|
| 1     | 9.652     | 13364514 | 688996 | 90.356  | 92.318   |
| 2     | 10.366    | 1426390  | 57331  | 9.644   | 7.682    |
| Total |           | 14790904 | 746327 | 100.000 | 100.000  |

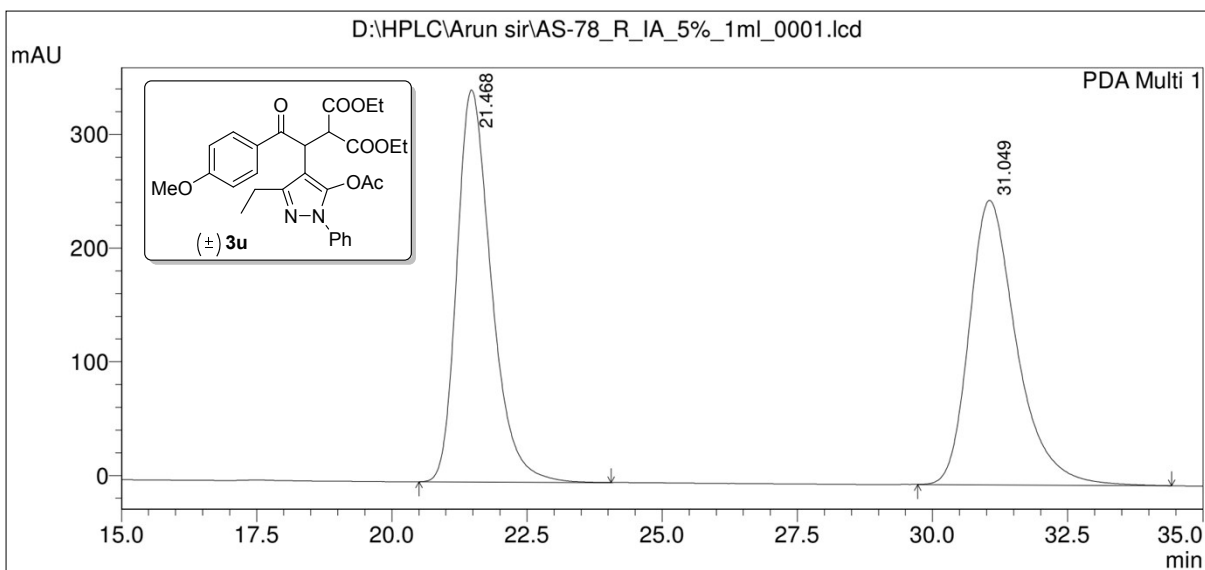

PeakTable

PDA Ch1 254nm 4nm

| Peak# | Ret. Time | Area     | Height | Area %  | Height % |
|-------|-----------|----------|--------|---------|----------|
| 1     | 21.468    | 15286118 | 344821 | 49.987  | 57.946   |
| 2     | 31.049    | 15293778 | 250254 | 50.013  | 42.054   |
| Total |           | 30579895 | 595075 | 100.000 | 100.000  |

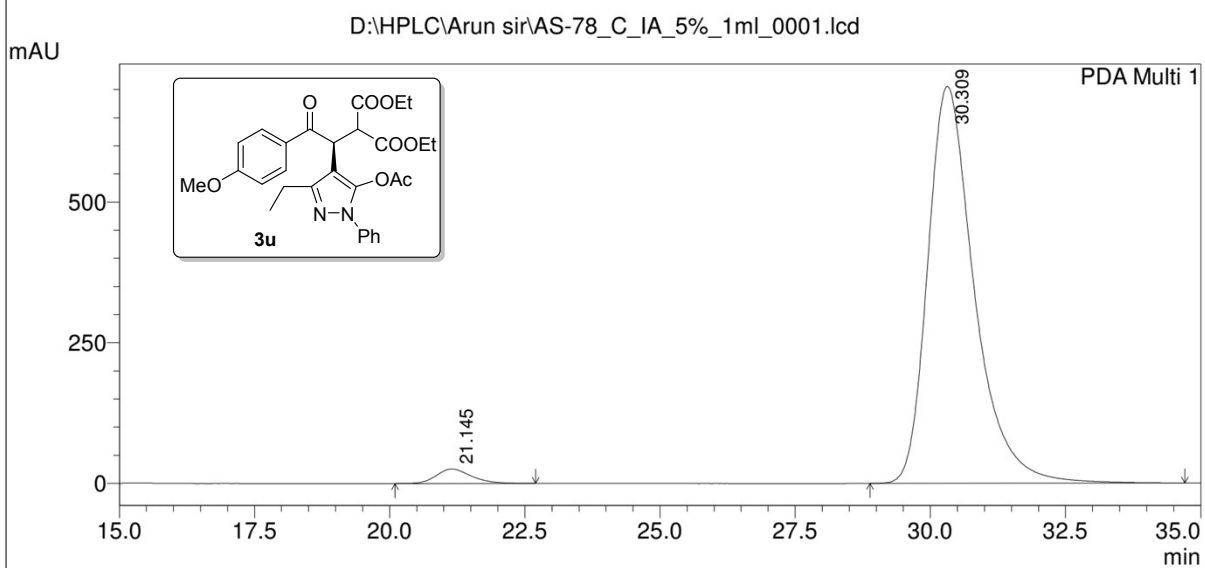

PeakTable

PDA Ch1 254nm 4nm

| Peak# | Ret. Time | Area     | Height | Area %  | Height % |
|-------|-----------|----------|--------|---------|----------|
| 1     | 21.145    | 1157759  | 25742  | 2.664   | 3.518    |
| 2     | 30.309    | 42298486 | 705997 | 97.336  | 96.482   |
| Total |           | 43456245 | 731739 | 100.000 | 100.000  |

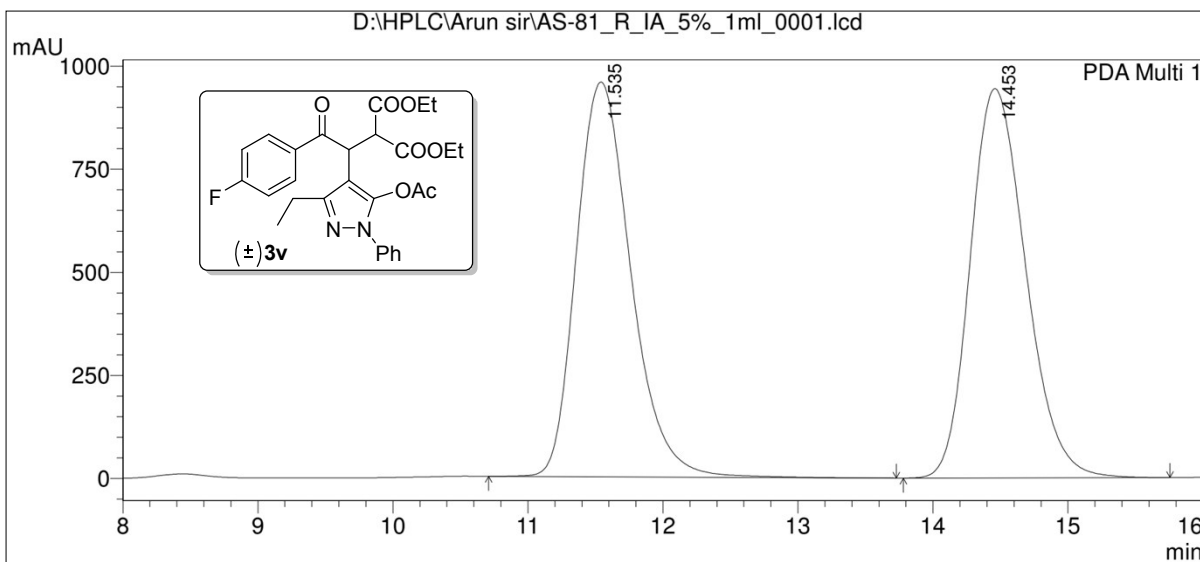

PeakTable

PDA Ch1 254nm 4nm

| Peak# | Ret. Time | Area     | Height  | Area %  | Height % |
|-------|-----------|----------|---------|---------|----------|
| 1     | 11.535    | 26844433 | 957701  | 49.895  | 50.361   |
| 2     | 14.453    | 26957015 | 943981  | 50.105  | 49.639   |
| Total |           | 53801448 | 1901681 | 100.000 | 100.000  |

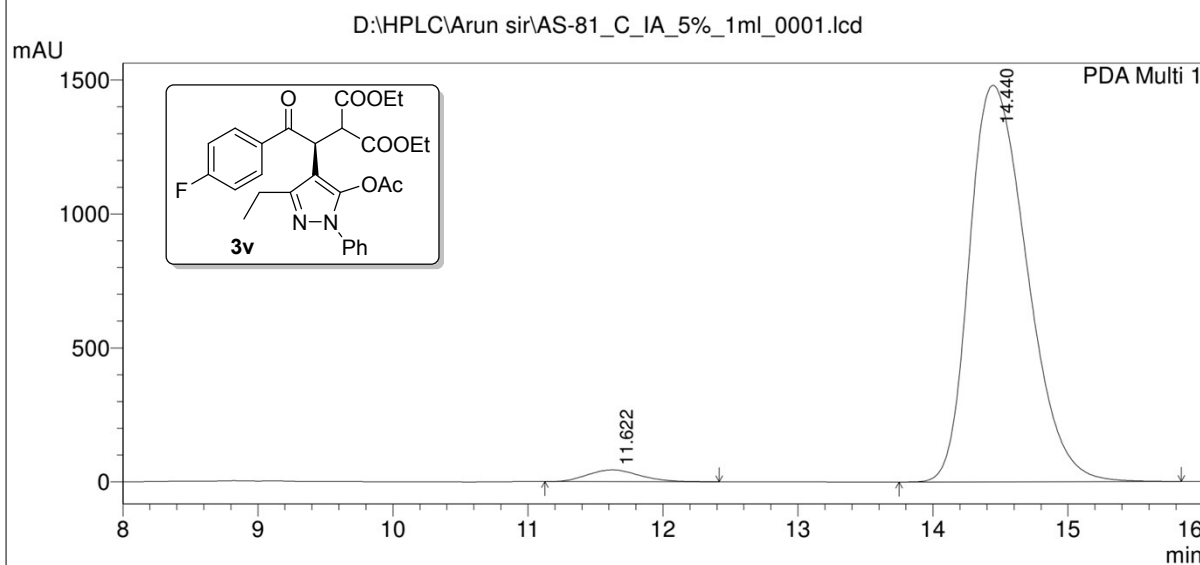

PeakTable

PDA Ch1 254nm 4nm

| Peak# | Ret. Time | Area     | Height  | Area %  | Height % |
|-------|-----------|----------|---------|---------|----------|
| 1     | 11.622    | 1175185  | 43908   | 2.615   | 2.880    |
| 2     | 14.440    | 43760158 | 1480482 | 97.385  | 97.120   |
| Total |           | 44935343 | 1524390 | 100.000 | 100.000  |

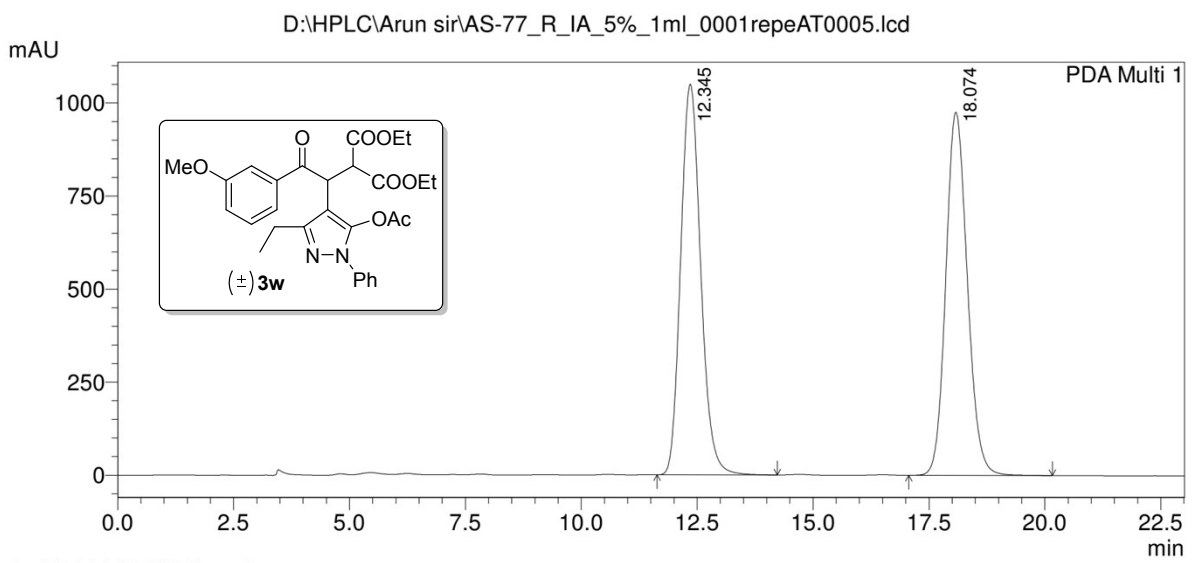

PeakTable

PDA Ch1 254nm 4nm

| Peak# | Ret. Time | Area     | Height  | Area %  | Height % |
|-------|-----------|----------|---------|---------|----------|
| 1     | 12.345    | 31530032 | 1049784 | 50.003  | 51.824   |
| 2     | 18.074    | 31526028 | 975892  | 49.997  | 48.176   |
| Total |           | 63056060 | 2025676 | 100.000 | 100.000  |

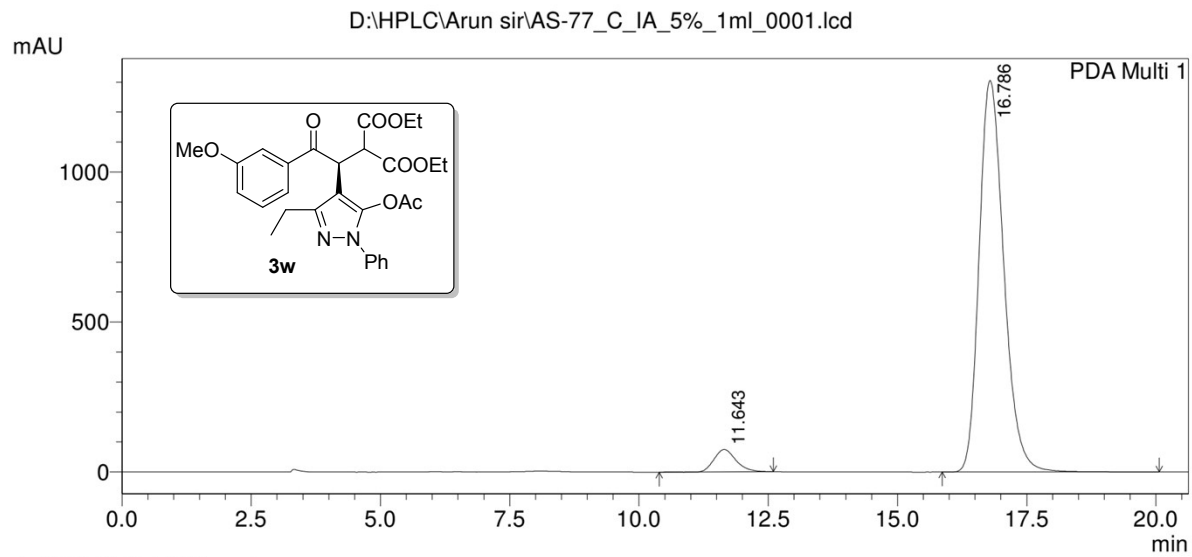

PeakTable

PDA Ch1 254nm 4nm

| Peak# | Ret. Time | Area     | Height  | Area %  | Height % |
|-------|-----------|----------|---------|---------|----------|
| 1     | 11.643    | 2194026  | 74429   | 4.814   | 5.393    |
| 2     | 16.786    | 43386091 | 1305632 | 95.186  | 94.607   |
| Total |           | 45580117 | 1380061 | 100.000 | 100.000  |

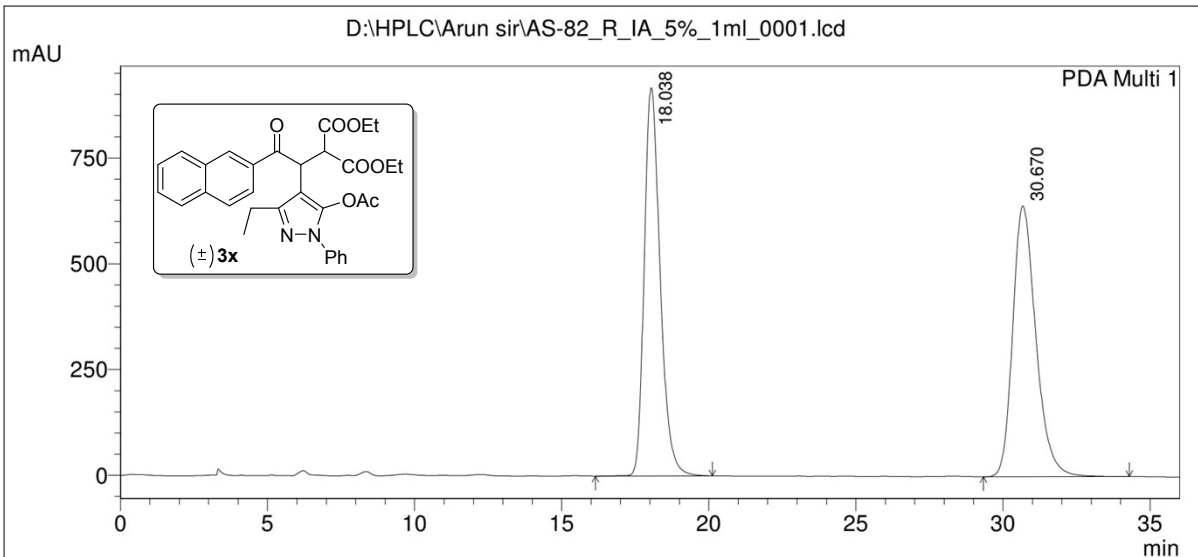

PeakTable

PDA Ch1 254nm 4nm

| Peak# | Ret. Time | Area     | Height  | Area %  | Height % |
|-------|-----------|----------|---------|---------|----------|
| 1     | 18.038    | 34536517 | 917219  | 49.651  | 58.914   |
| 2     | 30.670    | 35022409 | 639668  | 50.349  | 41.086   |
| Total |           | 69558926 | 1556887 | 100.000 | 100.000  |

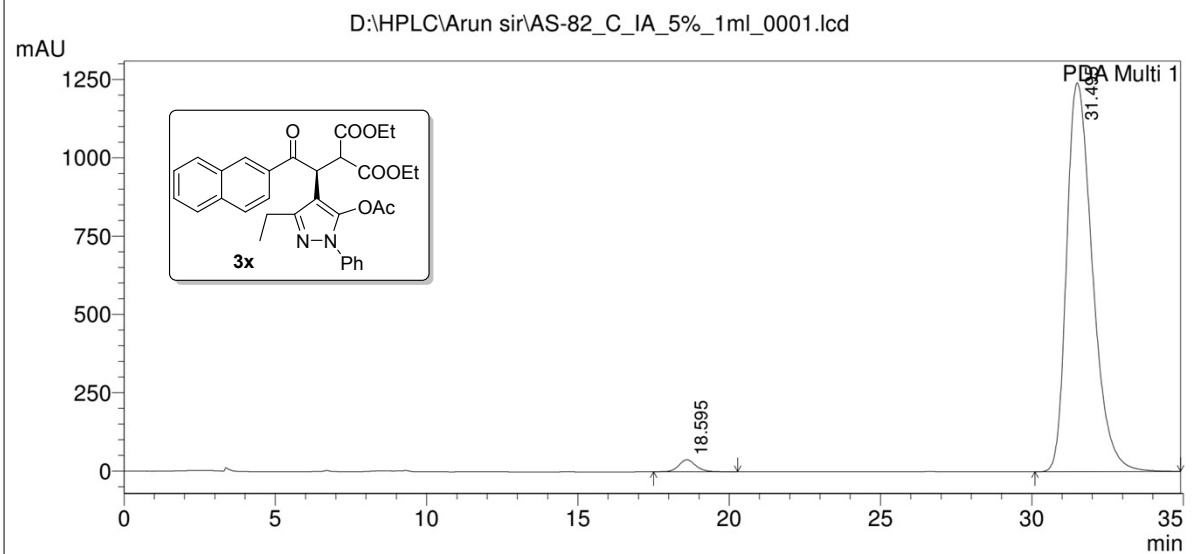

PeakTable

PDA Ch1 254nm 4nm

| Peak# | Ret. Time | Area     | Height  | Area %  | Height % |
|-------|-----------|----------|---------|---------|----------|
| 1     | 18.595    | 1490160  | 38199   | 1.984   | 2.985    |
| 2     | 31.495    | 73605388 | 1241325 | 98.016  | 97.015   |
| Total |           | 75095549 | 1279524 | 100.000 | 100.000  |



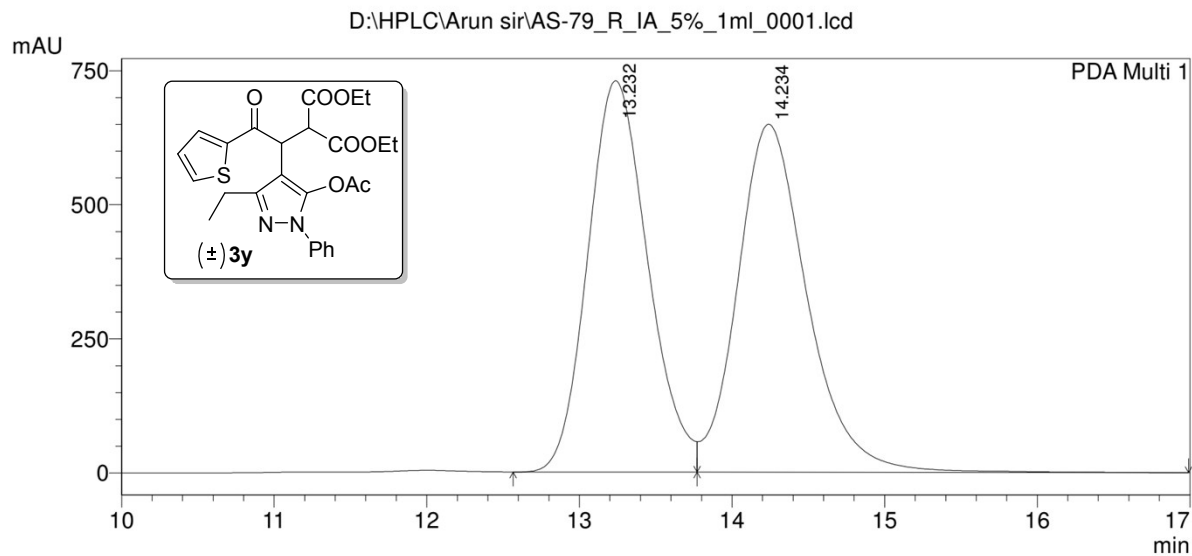

PeakTable

PDA Ch1 254nm 4nm

| Peak# | Ret. Time | Area     | Height  | Area %  | Height % |
|-------|-----------|----------|---------|---------|----------|
| 1     | 13.232    | 19928801 | 729678  | 49.155  | 52.927   |
| 2     | 14.234    | 20614366 | 648984  | 50.845  | 47.073   |
| Total |           | 40543167 | 1378662 | 100.000 | 100.000  |

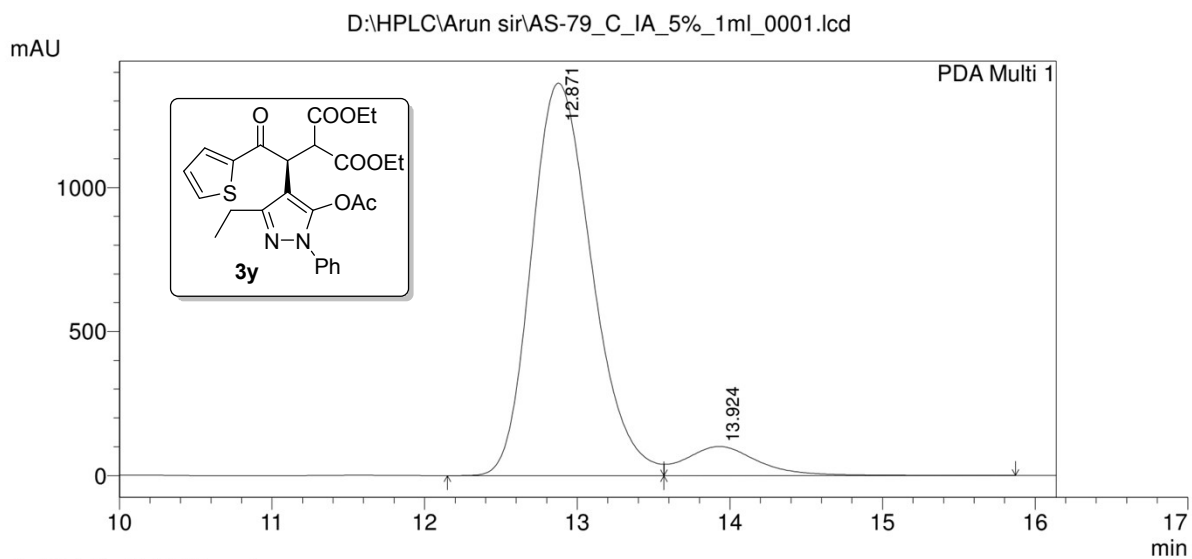

PeakTable

PDA Ch1 254nm 4nm

| Peak# | Ret. Time | Area     | Height  | Area %  | Height % |
|-------|-----------|----------|---------|---------|----------|
| 1     | 12.871    | 37589531 | 1362645 | 91.824  | 93.077   |
| 2     | 13.924    | 3347106  | 101360  | 8.176   | 6.923    |
| Total |           | 40936637 | 1464005 | 100.000 | 100.000  |

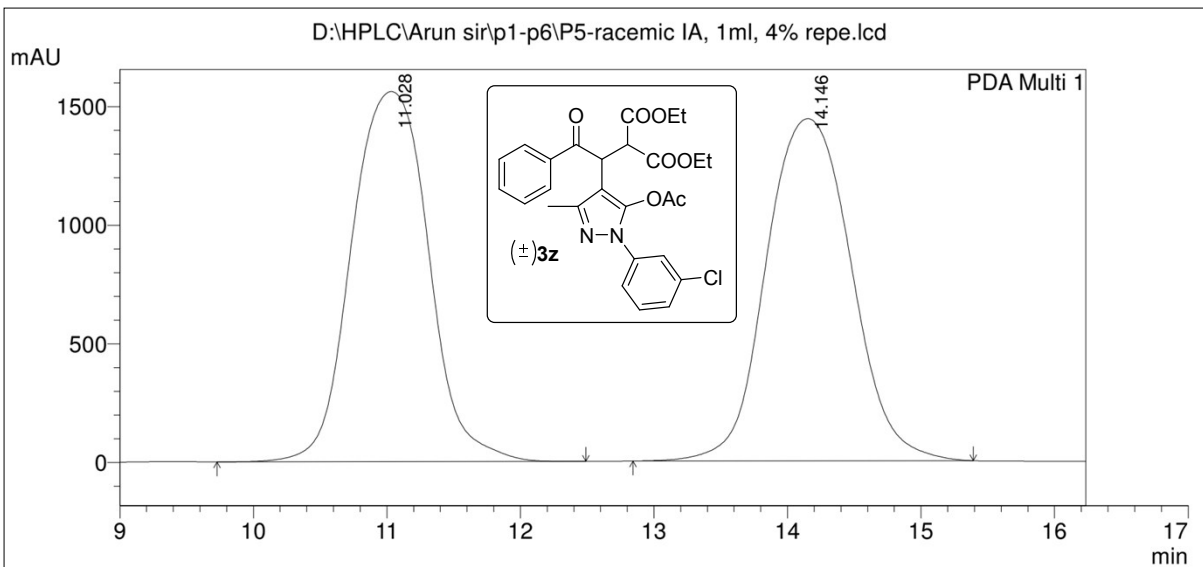

PeakTable

PDA Ch1 254nm 4nm

| Peak# | Ret. Time | Area      | Height  | Area %  | Height % |
|-------|-----------|-----------|---------|---------|----------|
| 1     | 11.028    | 62533952  | 1560458 | 49.459  | 51.963   |
| 2     | 14.146    | 63901026  | 1442582 | 50.541  | 48.037   |
| Total |           | 126434978 | 3003040 | 100.000 | 100.000  |

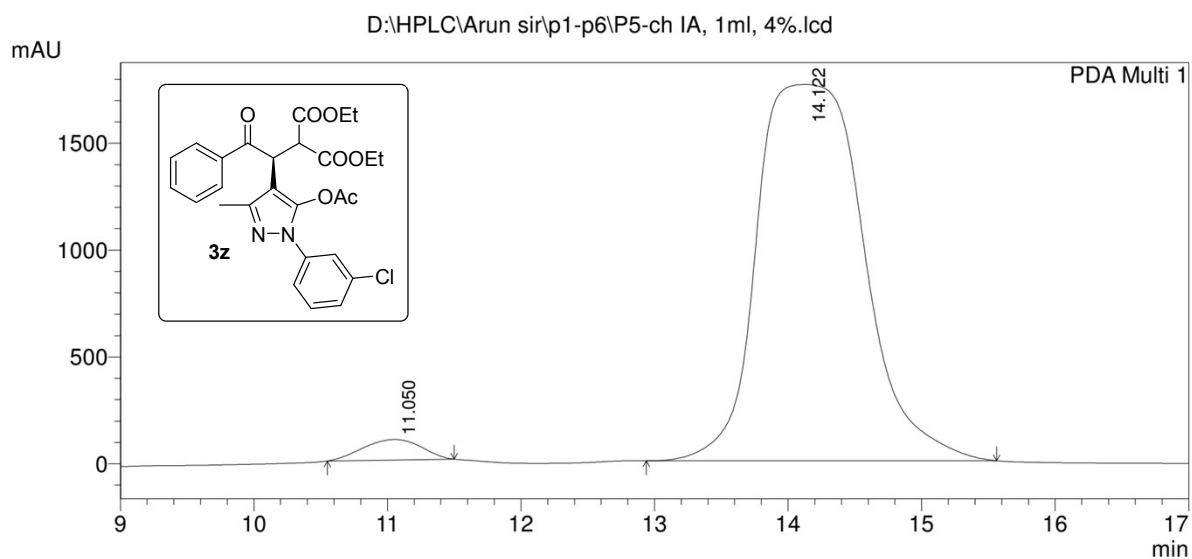

PeakTable

PDA Ch1 254nm 4nm

| Peak# | Ret. Time | Area      | Height  | Area %  | Height % |
|-------|-----------|-----------|---------|---------|----------|
| 1     | 11.050    | 2900517   | 95825   | 2.882   | 5.161    |
| 2     | 14.122    | 97744045  | 1760847 | 97.118  | 94.839   |
| Total |           | 100644562 | 1856673 | 100.000 | 100.000  |

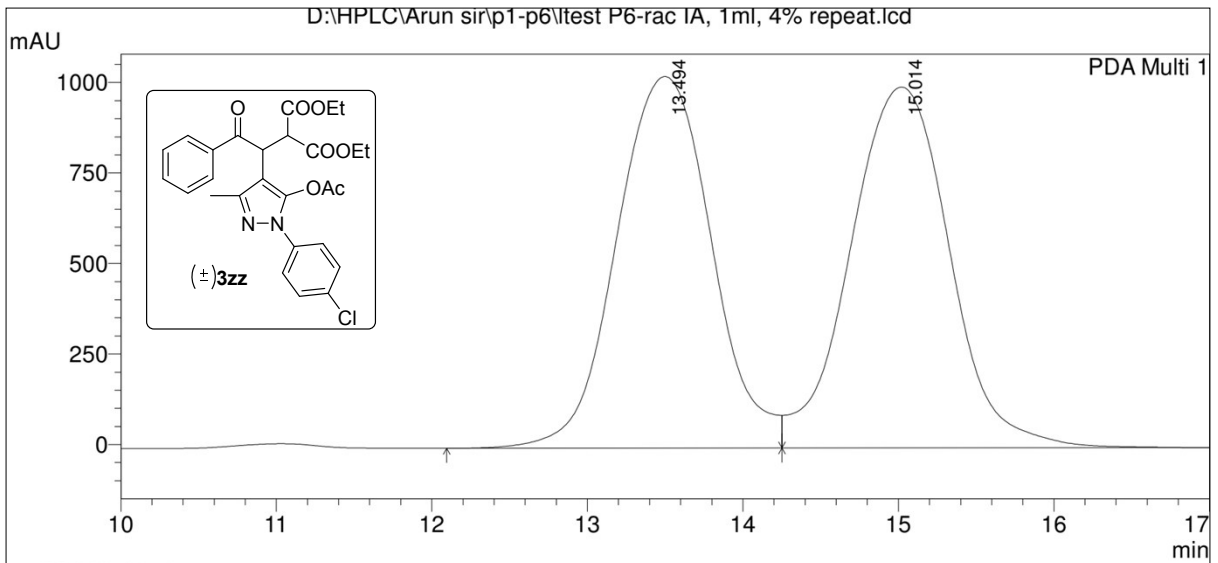

PeakTable

PDA Ch1 254nm 4nm

| Peak# | Ret. Time | Area     | Height  | Area %  | Height % |
|-------|-----------|----------|---------|---------|----------|
| 1     | 13.494    | 43512807 | 1026335 | 49.601  | 50.730   |
| 2     | 15.014    | 44212163 | 996790  | 50.399  | 49.270   |
| Total |           | 87724971 | 2023126 | 100.000 | 100.000  |

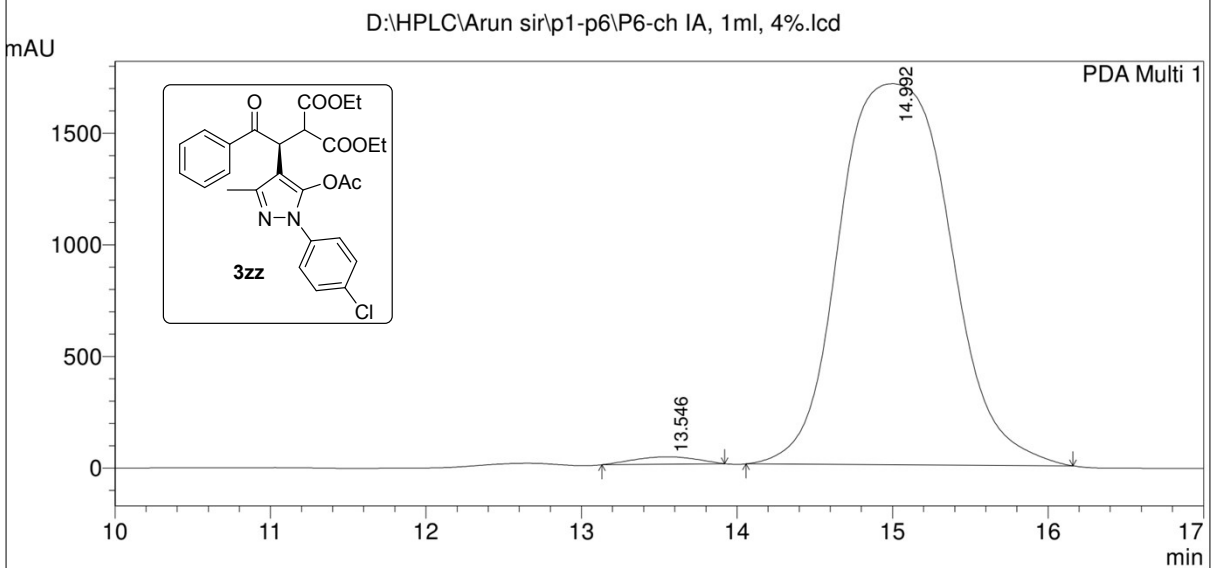

PeakTable

PDA Ch1 254nm 4nm

| Peak# | Ret. Time | Area     | Height  | Area %  | Height % |
|-------|-----------|----------|---------|---------|----------|
| 1     | 13.546    | 919684   | 32859   | 1.076   | 1.889    |
| 2     | 14.992    | 84575870 | 1706869 | 98.924  | 98.111   |
| Total |           | 85495553 | 1739727 | 100.000 | 100.000  |

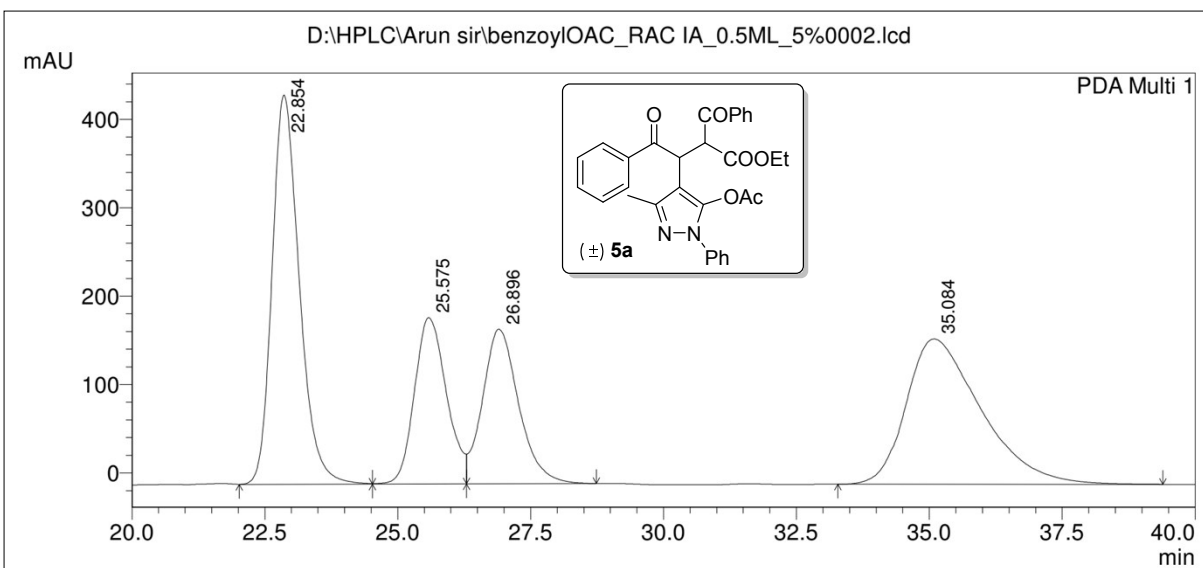

PeakTable

PDA Ch1 254nm 4nm

| Peak# | Ret. Time | Area     | Height | Area %  | Height % |
|-------|-----------|----------|--------|---------|----------|
| 1     | 22.854    | 15709351 | 440380 | 32.759  | 45.500   |
| 2     | 25.575    | 7911807  | 188207 | 16.499  | 19.446   |
| 3     | 26.896    | 8268677  | 174852 | 17.243  | 18.066   |
| 4     | 35.084    | 16064857 | 164425 | 33.500  | 16.988   |
| Total |           | 47954692 | 967864 | 100.000 | 100.000  |

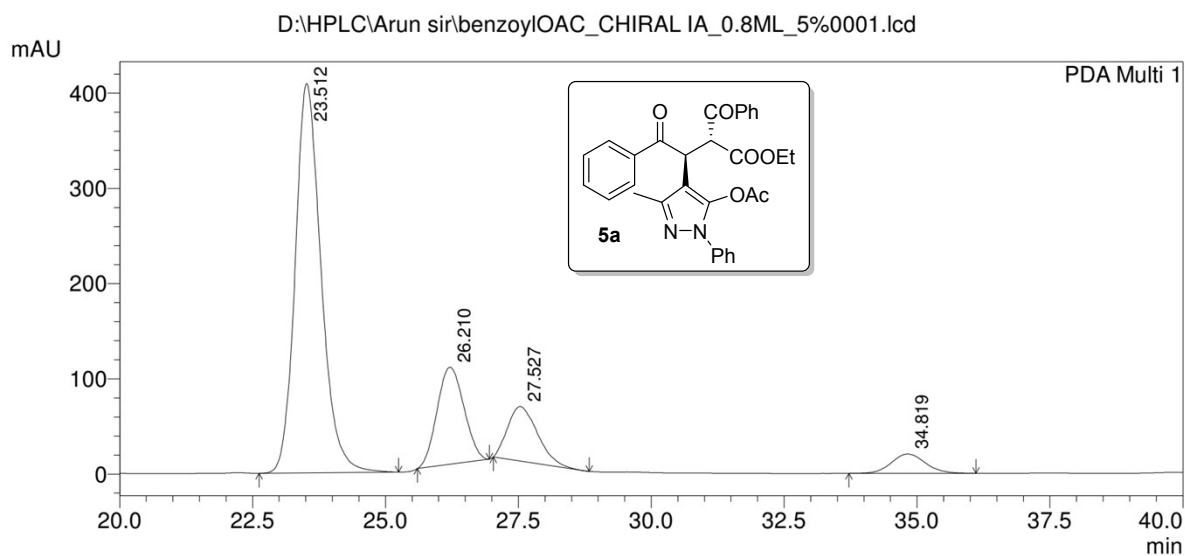

PeakTable

PDA Ch1 254nm 4nm

| Peak# | Ret. Time | Area     | Height | Area %  | Height % |
|-------|-----------|----------|--------|---------|----------|
| 1     | 23.512    | 13861082 | 409002 | 67.330  | 69.515   |
| 2     | 26.210    | 3589528  | 101961 | 17.436  | 17.330   |
| 3     | 27.527    | 2223640  | 57066  | 10.801  | 9.699    |
| 4     | 34.819    | 912447   | 20332  | 4.432   | 3.456    |
| Total |           | 20586696 | 588361 | 100.000 | 100.000  |
